# Supplementary material for: Variation in prostaglandin metabolism during growth of the diatom Thalassiosira rotula
Source: PubMed Central journal article supplement (PMC7096440; doi:10.1038/s41598-020-61967-3), 2020-03-25
Supplement: 41598_2020_61967_MOESM1_ESM.pdf [file 41598_2020_61967_MOESM1_ESM.pdf]

1 **Variation in prostaglandin metabolism during growth of the diatom *Thalassiosira rotula***  
2 **Valeria Di Dato, Roberta Barbarinaldi, Alberto Amato, Federica Di Costanzo, Carolina**  
3 **Fontanarosa, Anna Perna, Angela Amoresano, Francesco Esposito, Adele Cutignano,**  
4 **Adrianna Ianora, Giovanna Romano**

5

6

7

8

9

## **Supplementary Information**

10

11

12

13

14

15 **Supplementary information content:**

|    |                                                                                                                         |    |
|----|-------------------------------------------------------------------------------------------------------------------------|----|
| 16 | ✓ Supplementary figure 1:                                                                                               | 4  |
| 17 | <i>Phyre</i> <sup>2</sup> best hits structures from TrotCOX protein blast.                                              |    |
| 18 | ✓ Supplementary figure 2:                                                                                               | 10 |
| 19 | <i>Phyre</i> <sup>2</sup> alignment between <i>Thalassiosira rotula</i> (TrotCOX) and <i>Bos taurus</i> lactoperoxidase |    |
| 20 | (BtLPO).                                                                                                                |    |
| 21 | ✓ Supplementary figure 3:                                                                                               | 11 |
| 22 | <i>Phyre</i> <sup>2</sup> alignment between <i>Thalassiosira rotula</i> (TrotCOX) and <i>Ovis aries</i> cyclooxygenase  |    |
| 23 | (OaCOX).                                                                                                                |    |
| 24 | ✓ Supplementary figure 4:                                                                                               | 12 |
| 25 | Alignment of the diatoms sequences used in the phylogenetic analysis.                                                   |    |
| 26 | ✓ Supplementary table 1:                                                                                                | 13 |
| 27 | List of species and sequences ID used in the phylogenetic analysis.                                                     |    |
| 28 | ✓ External standard calibration method for PG quantization.                                                             | 15 |
| 29 | ✓ Supplementary figure 5:                                                                                               | 17 |
| 30 | Calibration curve of deuterated prostaglandin E2 (PGE2-d4) used as internal standard.                                   |    |
| 31 | ✓ Supplementary figure 6:                                                                                               | 18 |
| 32 | Calibration curve of prostaglandin E2 (PGE2) used as standard.                                                          |    |
| 33 | ✓ Supplementary figure 7:                                                                                               | 19 |
| 34 | Calibration curve of prostaglandin B2 (PGB2) used as standard.                                                          |    |
| 35 | ✓ Supplementary figure 8:                                                                                               | 20 |

|    |                                                                                        |    |
|----|----------------------------------------------------------------------------------------|----|
| 36 | Calibration curve of 15-Deoxy-Delta-12,14-prostaglandin J2 (15dPGJ2) used as standard. |    |
| 37 | ✓ Supplementary figure 9:                                                              | 21 |
| 38 | TIC chromatogram (A) of a representative sample and XIC chromatogram (B) of PGEM (327  |    |
| 39 | m/z precursor ion; 291 m/z and 309 m/z daughter ion).                                  |    |
| 40 | ✓ Supplementary table 3:                                                               | 22 |
| 41 | List of PGs identified in the culture medium with their LC-MS/MS parameters.           |    |
| 42 | ✓ Aligned sequences, with gap, used in the phylogenetic analysis:                      | 23 |
| 43 | ✓ Sequences used in the phylogenetic analysis, without gap                             | 38 |
| 44 | ✓ References                                                                           | 48 |
| 45 |                                                                                        |    |

46 **Supplementary figure 1.** Phyre2<sup>1</sup> best hits structures from TrotCOX protein blast.

47

48

# Phyre2

|               |                                            |
|---------------|--------------------------------------------|
| Email         | alberto.amato@cea.fr                       |
| Description   | Thalassiosira_rotula_TR754_c0_g1_i1_m_3431 |
| Date          | Thu Nov 7 16:33:40 GMT 2019                |
| Unique Job ID | ca99ec1885b17cd9                           |

Detailed template information

| #  | Template                | Alignment Coverage                                                                               | 3D Model                                                                            | Confidence | % i.d. | Template Information                                                                                                                                                                                                                                                                   |
|----|-------------------------|--------------------------------------------------------------------------------------------------|-------------------------------------------------------------------------------------|------------|--------|----------------------------------------------------------------------------------------------------------------------------------------------------------------------------------------------------------------------------------------------------------------------------------------|
| 1  | <a href="#">c2gjmA_</a> | <br>Alignment   |    | 100.0      | 19     | <b>PDB header:</b> oxidoreductase<br><b>Chain:</b> A: <b>PDB Molecule:</b> lactoperoxidase;<br><b>PDBTitle:</b> crystal structure of buffalo lactoperoxidase at 2.75a resolution                                                                                                       |
| 2  | <a href="#">c2oyuP_</a> | <br>Alignment   |    | 100.0      | 28     | <b>PDB header:</b> oxidoreductase<br><b>Chain:</b> P: <b>PDB Molecule:</b> prostaglandin g/h synthase 1;<br><b>PDBTitle:</b> indomethacin-(s)-alpha-ethyl-ethanolamide bound to cyclooxygenase-1                                                                                       |
| 3  | <a href="#">c1pggB_</a> | <br>Alignment   |    | 100.0      | 28     | <b>PDB header:</b> oxidoreductase<br><b>Chain:</b> B: <b>PDB Molecule:</b> prostaglandin h2 synthase-1;<br><b>PDBTitle:</b> prostaglandin h2 synthase-1 complexed with 1-(4-iodobenzoyl)-5-2 methoxy-2-methylindole-3-acetic acid (iodoindomethacin), trans model                      |
| 4  | <a href="#">c1ht8B_</a> | <br>Alignment   |    | 100.0      | 28     | <b>PDB header:</b> oxidoreductase<br><b>Chain:</b> B: <b>PDB Molecule:</b> prostaglandin h2 synthase-1;<br><b>PDBTitle:</b> the 2.7 angstrom resolution model of ovine cox-1 complexed with2 alclufenac                                                                                |
| 5  | <a href="#">d1q4ga1</a> | <br>Alignment |  | 100.0      | 28     | <b>Fold:</b> Heme-dependent peroxidases<br><b>Superfamily:</b> Heme-dependent peroxidases<br><b>Family:</b> Myeloperoxidase-like                                                                                                                                                       |
| 6  | <a href="#">c6ercA_</a> | <br>Alignment |  | 100.0      | 26     | <b>PDB header:</b> oxidoreductase<br><b>Chain:</b> A: <b>PDB Molecule:</b> peroxinectin a;<br><b>PDBTitle:</b> peroxidase a from dictyostelium discoideum (ddpoxa)                                                                                                                     |
| 7  | <a href="#">c5mfaA_</a> | <br>Alignment |  | 100.0      | 20     | <b>PDB header:</b> oxidoreductase<br><b>Chain:</b> A: <b>PDB Molecule:</b> myeloperoxidase;<br><b>PDBTitle:</b> crystal structure of human promyeloperoxidase (prompo)                                                                                                                 |
| 8  | <a href="#">c1ddxA_</a> | <br>Alignment |  | 100.0      | 27     | <b>PDB header:</b> oxidoreductase<br><b>Chain:</b> A: <b>PDB Molecule:</b> protein (prostaglandin h2 synthase-2);<br><b>PDBTitle:</b> crystal structure of a mixture of arachidonic acid and prostaglandin2 bound to the cyclooxygenase active site of cox-2: prostaglandin3 structure |
| 9  | <a href="#">c3pghD_</a> | <br>Alignment |  | 100.0      | 27     | <b>PDB header:</b> oxidoreductase<br><b>Chain:</b> D: <b>PDB Molecule:</b> cyclooxygenase-2;<br><b>PDBTitle:</b> cyclooxygenase-2 (prostaglandin synthase-2) complexed with a non-2 selective inhibitor, flurbiprofen                                                                  |
| 10 | <a href="#">d1cvua1</a> | <br>Alignment |  | 100.0      | 27     | <b>Fold:</b> Heme-dependent peroxidases<br><b>Superfamily:</b> Heme-dependent peroxidases<br><b>Family:</b> Myeloperoxidase-like                                                                                                                                                       |
| 11 | <a href="#">c1d2vD_</a> | <br>Alignment |  | 100.0      | 20     | <b>PDB header:</b> oxidoreductase<br><b>Chain:</b> D: <b>PDB Molecule:</b> myeloperoxidase;<br><b>PDBTitle:</b> crystal structure of bromide-bound human myeloperoxidase isoform c at2 ph 5.5                                                                                          |

|    |                         |           |              |       |    |                                                                                                                                                                                                                                                                      |
|----|-------------------------|-----------|--------------|-------|----|----------------------------------------------------------------------------------------------------------------------------------------------------------------------------------------------------------------------------------------------------------------------|
| 12 | <a href="#">c4hhsA_</a> | Alignment |              | 100.0 | 19 | <b>PDB header:</b> oxidoreductase<br><b>Chain:</b> A: <b>PDB Molecule:</b> alpha-dioxygenase;<br><b>PDBTitle:</b> crystal structure of fatty acid alpha-dioxygenase (arabidopsis2 thaliana)                                                                          |
| 13 | <a href="#">c4kvjA_</a> | Alignment |              | 100.0 | 19 | <b>PDB header:</b> oxidoreductase<br><b>Chain:</b> A: <b>PDB Molecule:</b> fatty acid alpha-oxidase;<br><b>PDBTitle:</b> crystal structure of oryza sativa fatty acid alpha-dioxygenase with2 hydrogen peroxide                                                      |
| 14 | <a href="#">c5gvrA_</a> | Alignment |              | 36.3  | 17 | <b>PDB header:</b> hydrolase<br><b>Chain:</b> A: <b>PDB Molecule:</b> probable atp-dependent rna helicase ddx41;<br><b>PDBTitle:</b> crystal structure of the ddx41 dead domain in an apo closed form                                                                |
| 15 | <a href="#">c3brcA_</a> | Alignment |              | 35.0  | 18 | <b>PDB header:</b> structural genomics, unknown function<br><b>Chain:</b> A: <b>PDB Molecule:</b> conserved protein of unknown function;<br><b>PDBTitle:</b> crystal structure of a conserved protein of unknown function from2 methanobacterium thermoautotrophicum |
| 16 | <a href="#">c1vk5A_</a> | Alignment |              | 33.5  | 20 | <b>PDB header:</b> structural genomics, unknown function<br><b>Chain:</b> A: <b>PDB Molecule:</b> expressed protein;<br><b>PDBTitle:</b> x-ray structure of gene product from arabidopsis thaliana at3g22680                                                         |
| 17 | <a href="#">d1vk5a_</a> | Alignment |              | 33.5  | 20 | <b>Fold:</b> Hypothetical protein At3g22680<br><b>Superfamily:</b> Hypothetical protein At3g22680<br><b>Family:</b> Hypothetical protein At3g22680                                                                                                                   |
| 18 | <a href="#">d1u7ka_</a> | Alignment |              | 28.8  | 33 | <b>Fold:</b> Retrovirus capsid protein, N-terminal core domain<br><b>Superfamily:</b> Retrovirus capsid protein, N-terminal core domain<br><b>Family:</b> Retrovirus capsid protein, N-terminal core domain                                                          |
| 19 | <a href="#">c3fe2B_</a> | Alignment |              | 22.4  | 13 | <b>PDB header:</b> hydrolase<br><b>Chain:</b> B: <b>PDB Molecule:</b> probable atp-dependent rna helicase ddx5;<br><b>PDBTitle:</b> human dead-box rna helicase ddx5 (p68), conserved domain i in complex2 with adp                                                  |
| 20 | <a href="#">c4px9C_</a> | Alignment |              | 21.3  | 12 | <b>PDB header:</b> translation, rna binding protein<br><b>Chain:</b> C: <b>PDB Molecule:</b> atp-dependent rna helicase ddx3x;<br><b>PDBTitle:</b> dead-box rna helicase ddx3x domain 1 with n-terminal atp-binding loop                                             |
| 21 | <a href="#">c3evyB_</a> | Alignment | not modelled | 17.7  | 9  | <b>PDB header:</b> hydrolase<br><b>Chain:</b> B: <b>PDB Molecule:</b> putative type i restriction enzyme r protein;<br><b>PDBTitle:</b> crystal structure of a fragment of a putative type i restriction2 enzyme r protein from bacteroides fragilis                 |
| 22 | <a href="#">d1ou9a_</a> | Alignment | not modelled | 17.3  | 21 | <b>Fold:</b> SspB-like<br><b>Superfamily:</b> SspB-like<br><b>Family:</b> Stringent starvation protein B, SspB                                                                                                                                                       |
| 23 | <a href="#">c2noxP_</a> | Alignment | not modelled | 17.3  | 14 | <b>PDB header:</b> oxidoreductase<br><b>Chain:</b> P: <b>PDB Molecule:</b> tryptophan 2,3-dioxygenase;<br><b>PDBTitle:</b> crystal structure of tryptophan 2,3-dioxygenase from ralstonia2 metallidurans                                                             |
| 24 | <a href="#">c6hwwA_</a> | Alignment | not modelled | 16.6  | 33 | <b>PDB header:</b> viral protein<br><b>Chain:</b> A: <b>PDB Molecule:</b> putative gag polyprotein;<br><b>PDBTitle:</b> immature mlv capsid hexamer structure in intact virus particles                                                                              |
| 25 | <a href="#">d1zszc1</a> | Alignment | not modelled | 16.5  | 16 | <b>Fold:</b> SspB-like<br><b>Superfamily:</b> SspB-like<br><b>Family:</b> Stringent starvation protein B, SspB                                                                                                                                                       |
| 26 | <a href="#">c6hwyB_</a> | Alignment | not modelled | 15.9  | 33 | <b>PDB header:</b> viral protein<br><b>Chain:</b> B: <b>PDB Molecule:</b> putative gag polyprotein;<br><b>PDBTitle:</b> mature mlv capsid pentamer structure in intact virus particles                                                                               |
| 27 | <a href="#">c3fhcB_</a> | Alignment | not modelled | 15.6  | 9  | <b>PDB header:</b> transport protein/hydrolase<br><b>Chain:</b> B: <b>PDB Molecule:</b> atp-dependent rna helicase ddx19b;<br><b>PDBTitle:</b> crystal structure of human dbp5 in complex with nup214                                                                |
| 28 | <a href="#">d1or7b2</a> | Alignment | not modelled | 15.0  | 32 | <b>Fold:</b> Sigma2 domain of RNA polymerase sigma factors<br><b>Superfamily:</b> Sigma2 domain of RNA polymerase sigma factors<br><b>Family:</b> Sigma2 domain of RNA polymerase sigma factors                                                                      |

|    |                         |           |              |      |    |                                                                                                                                                                                                                                                                                                                                                                        |
|----|-------------------------|-----------|--------------|------|----|------------------------------------------------------------------------------------------------------------------------------------------------------------------------------------------------------------------------------------------------------------------------------------------------------------------------------------------------------------------------|
| 29 | <a href="#">c4cmxB</a>  | Alignment | not modelled | 14.8 | 14 | <b>PDB header:</b> nuclear protein<br><b>Chain:</b> B: <b>PDB Molecule:</b> rv3378c;<br><b>PDBTitle:</b> crystal structure of rv3378c                                                                                                                                                                                                                                  |
| 30 | <a href="#">d1g1xc</a>  | Alignment | not modelled | 14.3 | 25 | <b>Fold:</b> DNA/RNA-binding 3-helical bundle<br><b>Superfamily:</b> Ribosomal protein S18<br><b>Family:</b> Ribosomal protein S18                                                                                                                                                                                                                                     |
| 31 | <a href="#">c4qicB</a>  | Alignment | not modelled | 14.2 | 18 | <b>PDB header:</b> signaling protein/dna binding protein<br><b>Chain:</b> B: <b>PDB Molecule:</b> anti-sigma factor nepr;<br><b>PDBTitle:</b> co-crystal structure of anti-anti-sigma factor phyr complexed with2 anti-sigma factor nepr from bartonella quintana                                                                                                      |
| 32 | <a href="#">d1mn3a</a>  | Alignment | not modelled | 13.8 | 14 | <b>Fold:</b> RuvA C-terminal domain-like<br><b>Superfamily:</b> UBA-like<br><b>Family:</b> CUE domain                                                                                                                                                                                                                                                                  |
| 33 | <a href="#">d1ou8a</a>  | Alignment | not modelled | 12.8 | 21 | <b>Fold:</b> SspB-like<br><b>Superfamily:</b> SspB-like<br><b>Family:</b> Stringent starvation protein B, SspB                                                                                                                                                                                                                                                         |
| 34 | <a href="#">c2c2xB</a>  | Alignment | not modelled | 12.6 | 14 | <b>PDB header:</b> oxidoreductase<br><b>Chain:</b> B: <b>PDB Molecule:</b> methylenetetrahydrofolate dehydrogenase-<br><b>PDBTitle:</b> three dimensional structure of bifunctional methylenetetrahydrofolate2 dehydrogenase-cyclohydrolase from mycobacterium tuberculosis                                                                                            |
| 35 | <a href="#">c1fcuA</a>  | Alignment | not modelled | 12.6 | 36 | <b>PDB header:</b> hydrolase<br><b>Chain:</b> A: <b>PDB Molecule:</b> hyaluronoglucosaminidase;<br><b>PDBTitle:</b> crystal structure (trigonal) of bee venom hyaluronidase                                                                                                                                                                                            |
| 36 | <a href="#">d1fcqa</a>  | Alignment | not modelled | 12.5 | 36 | <b>Fold:</b> TIM beta/alpha-barrel<br><b>Superfamily:</b> (Trans)glycosidases<br><b>Family:</b> Bee venom hyaluronidase                                                                                                                                                                                                                                                |
| 37 | <a href="#">c3fmpD</a>  | Alignment | not modelled | 12.2 | 9  | <b>PDB header:</b> oncoprotein/hydrolase<br><b>Chain:</b> D: <b>PDB Molecule:</b> atp-dependent rna helicase ddx19b;<br><b>PDBTitle:</b> crystal structure of the nucleoporin nup214 in complex with the dead-2 box helicase ddx19                                                                                                                                     |
| 38 | <a href="#">d1yfna1</a> | Alignment | not modelled | 11.9 | 21 | <b>Fold:</b> SspB-like<br><b>Superfamily:</b> SspB-like<br><b>Family:</b> Stringent starvation protein B, SspB                                                                                                                                                                                                                                                         |
| 39 | <a href="#">c2b19A</a>  | Alignment | not modelled | 11.5 | 42 | <b>PDB header:</b> neuropeptide<br><b>Chain:</b> A: <b>PDB Molecule:</b> neuropeptide k;<br><b>PDBTitle:</b> solution structure of mammalian tachykinin peptide,2 neuropeptide k                                                                                                                                                                                       |
| 40 | <a href="#">c3rfaB</a>  | Alignment | not modelled | 11.0 | 13 | <b>PDB header:</b> oxidoreductase<br><b>Chain:</b> B: <b>PDB Molecule:</b> ribosomal rna large subunit methyltransferase n;<br><b>PDBTitle:</b> x-ray structure of rlmn from escherichia coli in complex with s-2 adenosylmethionine                                                                                                                                   |
| 41 | <a href="#">c2kneB</a>  | Alignment | not modelled | 10.8 | 32 | <b>PDB header:</b> metal transport<br><b>Chain:</b> B: <b>PDB Molecule:</b> atpase, ca++ transporting, plasma membrane 4;<br><b>PDBTitle:</b> calmodulin wraps around its binding domain in the plasma2 membrane ca2+ pump anchored by a novel 18-1 motif                                                                                                              |
| 42 | <a href="#">d1upka</a>  | Alignment | not modelled | 10.6 | 12 | <b>Fold:</b> alpha-alpha superhelix<br><b>Superfamily:</b> ARM repeat<br><b>Family:</b> Mo25 protein                                                                                                                                                                                                                                                                   |
| 43 | <a href="#">c3rfaA</a>  | Alignment | not modelled | 10.2 | 13 | <b>PDB header:</b> oxidoreductase<br><b>Chain:</b> A: <b>PDB Molecule:</b> ribosomal rna large subunit methyltransferase n;<br><b>PDBTitle:</b> x-ray structure of rlmn from escherichia coli in complex with s-2 adenosylmethionine                                                                                                                                   |
| 44 | <a href="#">d2bmfa1</a> | Alignment | not modelled | 10.1 | 21 | <b>Fold:</b> P-loop containing nucleoside triphosphate hydrolases<br><b>Superfamily:</b> P-loop containing nucleoside triphosphate hydrolases<br><b>Family:</b> RNA helicase                                                                                                                                                                                           |
| 45 | <a href="#">d2qalr1</a> | Alignment | not modelled | 10.1 | 29 | <b>Fold:</b> DNA/RNA-binding 3-helical bundle<br><b>Superfamily:</b> Ribosomal protein S18<br><b>Family:</b> Ribosomal protein S18                                                                                                                                                                                                                                     |
| 46 | <a href="#">c3df1R</a>  | Alignment | not modelled | 10.1 | 29 | <b>PDB header:</b> ribosome<br><b>Chain:</b> R: <b>PDB Molecule:</b> 30s ribosomal protein s18;<br><b>PDBTitle:</b> crystal structure of the bacterial ribosome from escherichia coli in2 complex with hygromycin b. this file contains the 30s subunit of the3 first 70s ribosome, with hygromycin b bound. the entire crystal4 structure contains two 70s ribosomes. |
| 47 | <a href="#">d1ho8a</a>  | Alignment | not modelled | 9.9  | 21 | <b>Fold:</b> alpha-alpha superhelix<br><b>Superfamily:</b> ARM repeat<br><b>Family:</b> Regulatory subunit H of the V-type ATPase                                                                                                                                                                                                                                      |
| 48 | <a href="#">c3cuza</a>  | Alignment | not modelled | 9.9  | 9  | <b>PDB header:</b> transferase<br><b>Chain:</b> A: <b>PDB Molecule:</b> malate synthase a;<br><b>PDBTitle:</b> atomic resolution structures of escherichia coli and2 bacillus anthracis malate synthase a: comparison with3 isoform g and implications for structure based drug design                                                                                 |
| 49 | <a href="#">c2g2bA</a>  | Alignment | not modelled | 9.9  | 7  | <b>PDB header:</b> immune system<br><b>Chain:</b> A: <b>PDB Molecule:</b> allograft inflammatory factor 1;<br><b>PDBTitle:</b> nmr structure of the human allograft inflammatory factor 1                                                                                                                                                                              |
| 50 | <a href="#">c5gjuA</a>  | Alignment | not modelled | 9.5  | 26 | <b>PDB header:</b> hydrolase<br><b>Chain:</b> A: <b>PDB Molecule:</b> atp-dependent rna helicase dead;<br><b>PDBTitle:</b> dead-box rna helicase                                                                                                                                                                                                                       |
| 51 | <a href="#">c5cofA</a>  | Alignment | not modelled | 9.4  | 11 | <b>PDB header:</b> unknown function<br><b>Chain:</b> A: <b>PDB Molecule:</b> uncharacterized protein;<br><b>PDBTitle:</b> crystal structure of uncharacterised protein q1r1x2 from escherichia2 coli uti89                                                                                                                                                             |
| 52 | <a href="#">c5o5jR</a>  | Alignment | not modelled | 9.3  | 31 | <b>PDB header:</b> ribosome<br><b>Chain:</b> R: <b>PDB Molecule:</b> 30s ribosomal protein s18 2;<br><b>PDBTitle:</b> structure of the 30s small ribosomal subunit from mycobacterium2 smegmatis                                                                                                                                                                       |
| 53 | <a href="#">c3a0bT</a>  | Alignment | not modelled | 8.9  | 20 | <b>PDB header:</b> electron transport<br><b>Chain:</b> T: <b>PDB Molecule:</b> photosystem ii reaction center protein t;<br><b>PDBTitle:</b> crystal structure of br-substituted photosystem ii complex                                                                                                                                                                |

|    |                         |           |              |     |    |                                                                                                                                                                                                                                                              |
|----|-------------------------|-----------|--------------|-----|----|--------------------------------------------------------------------------------------------------------------------------------------------------------------------------------------------------------------------------------------------------------------|
| 54 | <a href="#">c5mx2T</a>  | Alignment | not modelled | 8.2 | 18 | <b>PDB header:</b> oxidoreductase<br><b>Chain:</b> T; <b>PDB Molecule:</b> photosystem ii reaction center protein t;<br><b>PDBTitle:</b> photosystem ii depleted of the mn4cao5 cluster at 2.55 a resolution                                                 |
| 55 | <a href="#">c2lv1J</a>  | Alignment | not modelled | 8.2 | 17 | <b>PDB header:</b> lyase<br><b>Chain:</b> J; <b>PDB Molecule:</b> cyanate hydratase;<br><b>PDBTitle:</b> site directed mutagenesis of key residues involved in the catalytic2 mechanism of cyanase                                                           |
| 56 | <a href="#">d1rfya</a>  | Alignment | not modelled | 8.2 | 24 | <b>Fold:</b> Long alpha-hairpin<br><b>Superfamily:</b> Transcriptional repressor TraM<br><b>Family:</b> Transcriptional repressor TraM                                                                                                                       |
| 57 | <a href="#">c5aj3R</a>  | Alignment | not modelled | 8.0 | 6  | <b>PDB header:</b> ribosome<br><b>Chain:</b> R; <b>PDB Molecule:</b> mitoribosomal protein bs18m, mrps18c;<br><b>PDBTitle:</b> structure of the small subunit of the mammalian mitoribosome                                                                  |
| 58 | <a href="#">c2c0zA</a>  | Alignment | not modelled | 7.9 | 22 | <b>PDB header:</b> isomerase<br><b>Chain:</b> A; <b>PDB Molecule:</b> novw;<br><b>PDBTitle:</b> the 1.6 a resolution crystal structure of novw: a 4-keto-6-2 deoxy sugar epimerase from the novobiocin biosynthetic3 gene cluster of streptomyces spheroides |
| 59 | <a href="#">c3j0xU</a>  | Alignment | not modelled | 7.8 | 31 | <b>PDB header:</b> ribosome<br><b>Chain:</b> U; <b>PDB Molecule:</b> 30s ribosomal protein s18;<br><b>PDBTitle:</b> structural characterization of mrna-trna translocation intermediates2 (30s ribosome of class 4b of the six classes)                      |
| 60 | <a href="#">d1wrka1</a> | Alignment | not modelled | 7.8 | 7  | <b>Fold:</b> EF Hand-like<br><b>Superfamily:</b> EF-hand<br><b>Family:</b> Calmodulin-like                                                                                                                                                                   |
| 61 | <a href="#">c1upiA</a>  | Alignment | not modelled | 7.8 | 16 | <b>PDB header:</b> epimerase<br><b>Chain:</b> A; <b>PDB Molecule:</b> ddtp-4-dehydrorhamnose 3,5-epimerase;<br><b>PDBTitle:</b> mycobacterium tuberculosis rmlc epimerase (rv3465)                                                                           |
| 62 | <a href="#">c5b66T</a>  | Alignment | not modelled | 7.7 | 18 | <b>PDB header:</b> electron transport, photosynthesis<br><b>Chain:</b> T; <b>PDB Molecule:</b> photosystem ii reaction center protein t;<br><b>PDBTitle:</b> crystal structure analysis of photosystem ii complex                                            |
| 63 | <a href="#">c3bbnR</a>  | Alignment | not modelled | 7.7 | 27 | <b>PDB header:</b> ribosome<br><b>Chain:</b> R; <b>PDB Molecule:</b> ribosomal protein s18;<br><b>PDBTitle:</b> homology model for the spinach chloroplast 30s subunit fitted to 9.4a2 cryo-em map of the 70s chlororibosome.                                |
| 64 | <a href="#">c5gtht</a>  | Alignment | not modelled | 7.6 | 18 | <b>PDB header:</b> photosynthesis<br><b>Chain:</b> T; <b>PDB Molecule:</b> photosystem ii reaction center protein t;<br><b>PDBTitle:</b> native xfel structure of photosystem ii (dark dataset)                                                              |
| 65 | <a href="#">c5ws5t</a>  | Alignment | not modelled | 7.6 | 18 | <b>PDB header:</b> photosynthesis<br><b>Chain:</b> T; <b>PDB Molecule:</b> photosystem ii reaction center protein t;<br><b>PDBTitle:</b> native xfel structure of photosystem ii (preflash dark dataset)                                                     |
| 66 | <a href="#">c5ws6t</a>  | Alignment | not modelled | 7.6 | 18 | <b>PDB header:</b> photosynthesis<br><b>Chain:</b> T; <b>PDB Molecule:</b> photosystem ii reaction center protein t;<br><b>PDBTitle:</b> native xfel structure of photosystem ii (preflash two-flash dataset)                                                |
| 67 | <a href="#">c5ws5T</a>  | Alignment | not modelled | 7.6 | 18 | <b>PDB header:</b> photosynthesis<br><b>Chain:</b> T; <b>PDB Molecule:</b> photosystem ii reaction center protein t;<br><b>PDBTitle:</b> native xfel structure of photosystem ii (preflash dark dataset)                                                     |
| 68 | <a href="#">c5gthT</a>  | Alignment | not modelled | 7.6 | 18 | <b>PDB header:</b> photosynthesis<br><b>Chain:</b> T; <b>PDB Molecule:</b> photosystem ii reaction center protein t;<br><b>PDBTitle:</b> native xfel structure of photosystem ii (dark dataset)                                                              |
| 69 | <a href="#">c3wu2T</a>  | Alignment | not modelled | 7.6 | 18 | <b>PDB header:</b> electron transport, photosynthesis<br><b>Chain:</b> T; <b>PDB Molecule:</b> photosystem ii reaction center protein t;<br><b>PDBTitle:</b> crystal structure analysis of photosystem ii complex                                            |
| 70 | <a href="#">c5h2fT</a>  | Alignment | not modelled | 7.6 | 18 | <b>PDB header:</b> photosynthesis<br><b>Chain:</b> T; <b>PDB Molecule:</b> photosystem ii reaction center protein t;<br><b>PDBTitle:</b> crystal structure of the psbm-deletion mutant of photosystem ii                                                     |
| 71 | <a href="#">c5kait</a>  | Alignment | not modelled | 7.6 | 18 | <b>PDB header:</b> electron transport<br><b>Chain:</b> T; <b>PDB Molecule:</b> photosystem ii reaction center protein t;<br><b>PDBTitle:</b> nh3-bound rt xfel structure of photosystem ii 500 ms after the 2nd2 illumination (2f) at 2.8 a resolution       |
| 72 | <a href="#">c5h2ft</a>  | Alignment | not modelled | 7.6 | 18 | <b>PDB header:</b> photosynthesis<br><b>Chain:</b> T; <b>PDB Molecule:</b> photosystem ii reaction center protein t;<br><b>PDBTitle:</b> crystal structure of the psbm-deletion mutant of photosystem ii                                                     |
| 73 | <a href="#">c4ub8t</a>  | Alignment | not modelled | 7.6 | 18 | <b>PDB header:</b> electron transport, photosynthesis<br><b>Chain:</b> T; <b>PDB Molecule:</b> photosystem ii reaction center protein t;<br><b>PDBTitle:</b> native structure of photosystem ii (dataset-2) by a femtosecond x-ray2 laser                    |
| 74 | <a href="#">c3wu2t</a>  | Alignment | not modelled | 7.6 | 18 | <b>PDB header:</b> electron transport, photosynthesis<br><b>Chain:</b> T; <b>PDB Molecule:</b> photosystem ii reaction center protein t;<br><b>PDBTitle:</b> crystal structure analysis of photosystem ii complex                                            |
| 75 | <a href="#">c5gtiT</a>  | Alignment | not modelled | 7.6 | 18 | <b>PDB header:</b> photosynthesis<br><b>Chain:</b> T; <b>PDB Molecule:</b> photosystem ii reaction center protein t;<br><b>PDBTitle:</b> native xfel structure of photosystem ii (two flash dataset)                                                         |
| 76 | <a href="#">c5v2cT</a>  | Alignment | not modelled | 7.6 | 18 | <b>PDB header:</b> electron transport, photosynthesis<br><b>Chain:</b> T; <b>PDB Molecule:</b> photosystem ii reaction center protein t;<br><b>PDBTitle:</b> re-refinement of crystal structure of photosystem ii complex                                    |
| 77 | <a href="#">c5gtit</a>  | Alignment | not modelled | 7.6 | 18 | <b>PDB header:</b> photosynthesis<br><b>Chain:</b> T; <b>PDB Molecule:</b> photosystem ii reaction center protein t;<br><b>PDBTitle:</b> native xfel structure of photosystem ii (two flash dataset)                                                         |
| 78 | <a href="#">c5v2ct</a>  | Alignment | not modelled | 7.6 | 18 | <b>PDB header:</b> electron transport, photosynthesis<br><b>Chain:</b> T; <b>PDB Molecule:</b> photosystem ii reaction center protein t;<br><b>PDBTitle:</b> re-refinement of crystal structure of photosystem ii complex                                    |
| 79 | <a href="#">c6j1pt</a>  | Alignment | not modelled | 7.6 | 18 | <b>PDB header:</b> photosynthesis<br><b>Chain:</b> T; <b>PDB Molecule:</b> photosystem ii reaction center protein t;<br><b>PDBTitle:</b> xfel structure of cyanobacterial photosystem ii (3f state, dataset2)                                                |
|    |                         |           |              |     |    | <b>PDB header:</b> photosynthesis                                                                                                                                                                                                                            |



|    |                        |           |              |     |    |                                                                                                                                                                                                                                                     |
|----|------------------------|-----------|--------------|-----|----|-----------------------------------------------------------------------------------------------------------------------------------------------------------------------------------------------------------------------------------------------------|
| 80 | <a href="#">c6jlpT</a> | Alignment | not modelled | 7.6 | 18 | <b>Chain:</b> T; <b>PDB Molecule:</b> photosystem ii reaction center protein t; <b>PDBTitle:</b> xfel structure of cyanobacterial photosystem ii (3f state, dataset2)                                                                               |
| 81 | <a href="#">c6jlmT</a> | Alignment | not modelled | 7.6 | 18 | <b>PDB header:</b> photosynthesis<br><b>Chain:</b> T; <b>PDB Molecule:</b> photosystem ii reaction center protein t; <b>PDBTitle:</b> xfel structure of cyanobacterial photosystem ii (dark state, dataset2)                                        |
| 82 | <a href="#">c6jlkT</a> | Alignment | not modelled | 7.6 | 18 | <b>PDB header:</b> photosynthesis<br><b>Chain:</b> T; <b>PDB Molecule:</b> photosystem ii reaction center protein t; <b>PDBTitle:</b> xfel structure of cyanobacterial photosystem ii (1f state, dataset1)                                          |
| 83 | <a href="#">c6jloT</a> | Alignment | not modelled | 7.6 | 18 | <b>PDB header:</b> photosynthesis<br><b>Chain:</b> T; <b>PDB Molecule:</b> photosystem ii reaction center protein t; <b>PDBTitle:</b> xfel structure of cyanobacterial photosystem ii (2f state, dataset2)                                          |
| 84 | <a href="#">c6jltT</a> | Alignment | not modelled | 7.6 | 18 | <b>PDB header:</b> photosynthesis<br><b>Chain:</b> T; <b>PDB Molecule:</b> photosystem ii reaction center protein t; <b>PDBTitle:</b> xfel structure of cyanobacterial photosystem ii (dark state, dataset1)                                        |
| 85 | <a href="#">c6jllT</a> | Alignment | not modelled | 7.6 | 18 | <b>PDB header:</b> photosynthesis<br><b>Chain:</b> T; <b>PDB Molecule:</b> photosystem ii reaction center protein t; <b>PDBTitle:</b> xfel structure of cyanobacterial photosystem ii (2f state, dataset1)                                          |
| 86 | <a href="#">c6jlot</a> | Alignment | not modelled | 7.6 | 18 | <b>PDB header:</b> photosynthesis<br><b>Chain:</b> T; <b>PDB Molecule:</b> photosystem ii reaction center protein t; <b>PDBTitle:</b> xfel structure of cyanobacterial photosystem ii (2f state, dataset2)                                          |
| 87 | <a href="#">c6jlnT</a> | Alignment | not modelled | 7.6 | 18 | <b>PDB header:</b> photosynthesis<br><b>Chain:</b> T; <b>PDB Molecule:</b> photosystem ii reaction center protein t; <b>PDBTitle:</b> xfel structure of cyanobacterial photosystem ii (1f state, dataset2)                                          |
| 88 | <a href="#">c6jlnT</a> | Alignment | not modelled | 7.6 | 18 | <b>PDB header:</b> photosynthesis<br><b>Chain:</b> T; <b>PDB Molecule:</b> photosystem ii reaction center protein t; <b>PDBTitle:</b> xfel structure of cyanobacterial photosystem ii (1f state, dataset2)                                          |
| 89 | <a href="#">c6jllT</a> | Alignment | not modelled | 7.6 | 18 | <b>PDB header:</b> photosynthesis<br><b>Chain:</b> T; <b>PDB Molecule:</b> photosystem ii reaction center protein t; <b>PDBTitle:</b> xfel structure of cyanobacterial photosystem ii (2f state, dataset1)                                          |
| 90 | <a href="#">c6jikt</a> | Alignment | not modelled | 7.6 | 18 | <b>PDB header:</b> photosynthesis<br><b>Chain:</b> T; <b>PDB Molecule:</b> photosystem ii reaction center protein t; <b>PDBTitle:</b> xfel structure of cyanobacterial photosystem ii (1f state, dataset1)                                          |
| 91 | <a href="#">c6jimt</a> | Alignment | not modelled | 7.6 | 18 | <b>PDB header:</b> photosynthesis<br><b>Chain:</b> T; <b>PDB Molecule:</b> photosystem ii reaction center protein t; <b>PDBTitle:</b> xfel structure of cyanobacterial photosystem ii (dark state, dataset2)                                        |
| 92 | <a href="#">c6jjtT</a> | Alignment | not modelled | 7.6 | 18 | <b>PDB header:</b> photosynthesis<br><b>Chain:</b> T; <b>PDB Molecule:</b> photosystem ii reaction center protein t; <b>PDBTitle:</b> xfel structure of cyanobacterial photosystem ii (dark state, dataset1)                                        |
| 93 | <a href="#">c5tisT</a> | Alignment | not modelled | 7.6 | 18 | <b>PDB header:</b> photosynthesis<br><b>Chain:</b> T; <b>PDB Molecule:</b> photosystem ii reaction center protein t; <b>PDBTitle:</b> room temperature xfel structure of the native, doubly-illuminated2 photosystem ii complex                     |
| 94 | <a href="#">c5zznT</a> | Alignment | not modelled | 7.6 | 18 | <b>PDB header:</b> electron transport<br><b>Chain:</b> T; <b>PDB Molecule:</b> photosystem ii reaction center protein t; <b>PDBTitle:</b> crystal structure of photosystem ii from an sqdg-deficient mutant of2 thermosynechococcus elongatus       |
| 95 | <a href="#">c5kaiT</a> | Alignment | not modelled | 7.6 | 18 | <b>PDB header:</b> electron transport<br><b>Chain:</b> T; <b>PDB Molecule:</b> photosystem ii reaction center protein t; <b>PDBTitle:</b> nh3-bound rt xfel structure of photosystem ii 500 ms after the 2nd2 illumination (2f) at 2.8 a resolution |
| 96 | <a href="#">c5kafT</a> | Alignment | not modelled | 7.6 | 18 | <b>PDB header:</b> electron transport<br><b>Chain:</b> T; <b>PDB Molecule:</b> photosystem ii reaction center protein t; <b>PDBTitle:</b> rt xfel structure of photosystem ii in the dark state at 3.0 a2 resolution                                |
| 97 | <a href="#">c4ub6T</a> | Alignment | not modelled | 7.6 | 18 | <b>PDB header:</b> electron transport, photosynthesis<br><b>Chain:</b> T; <b>PDB Molecule:</b> photosystem ii reaction center protein t; <b>PDBTitle:</b> native structure of photosystem ii (dataset-1) by a femtosecond x-ray2 laser              |
| 98 | <a href="#">c5zznT</a> | Alignment | not modelled | 7.6 | 18 | <b>PDB header:</b> electron transport<br><b>Chain:</b> T; <b>PDB Molecule:</b> photosystem ii reaction center protein t; <b>PDBTitle:</b> crystal structure of photosystem ii from an sqdg-deficient mutant of2 thermosynechococcus elongatus       |
| 99 | <a href="#">c4il6T</a> | Alignment | not modelled | 7.6 | 18 | <b>PDB header:</b> electron transport<br><b>Chain:</b> T; <b>PDB Molecule:</b> photosystem ii reaction center protein t; <b>PDBTitle:</b> structure of sr-substituted photosystem ii                                                                |

54 **Supplementary figure 2.** Phyre2<sup>1</sup> alignment between *Thalassiosira rotula* (TrotCOX) and *Bos*  
 55 *taurus* lactoperoxidase (BtLPO).

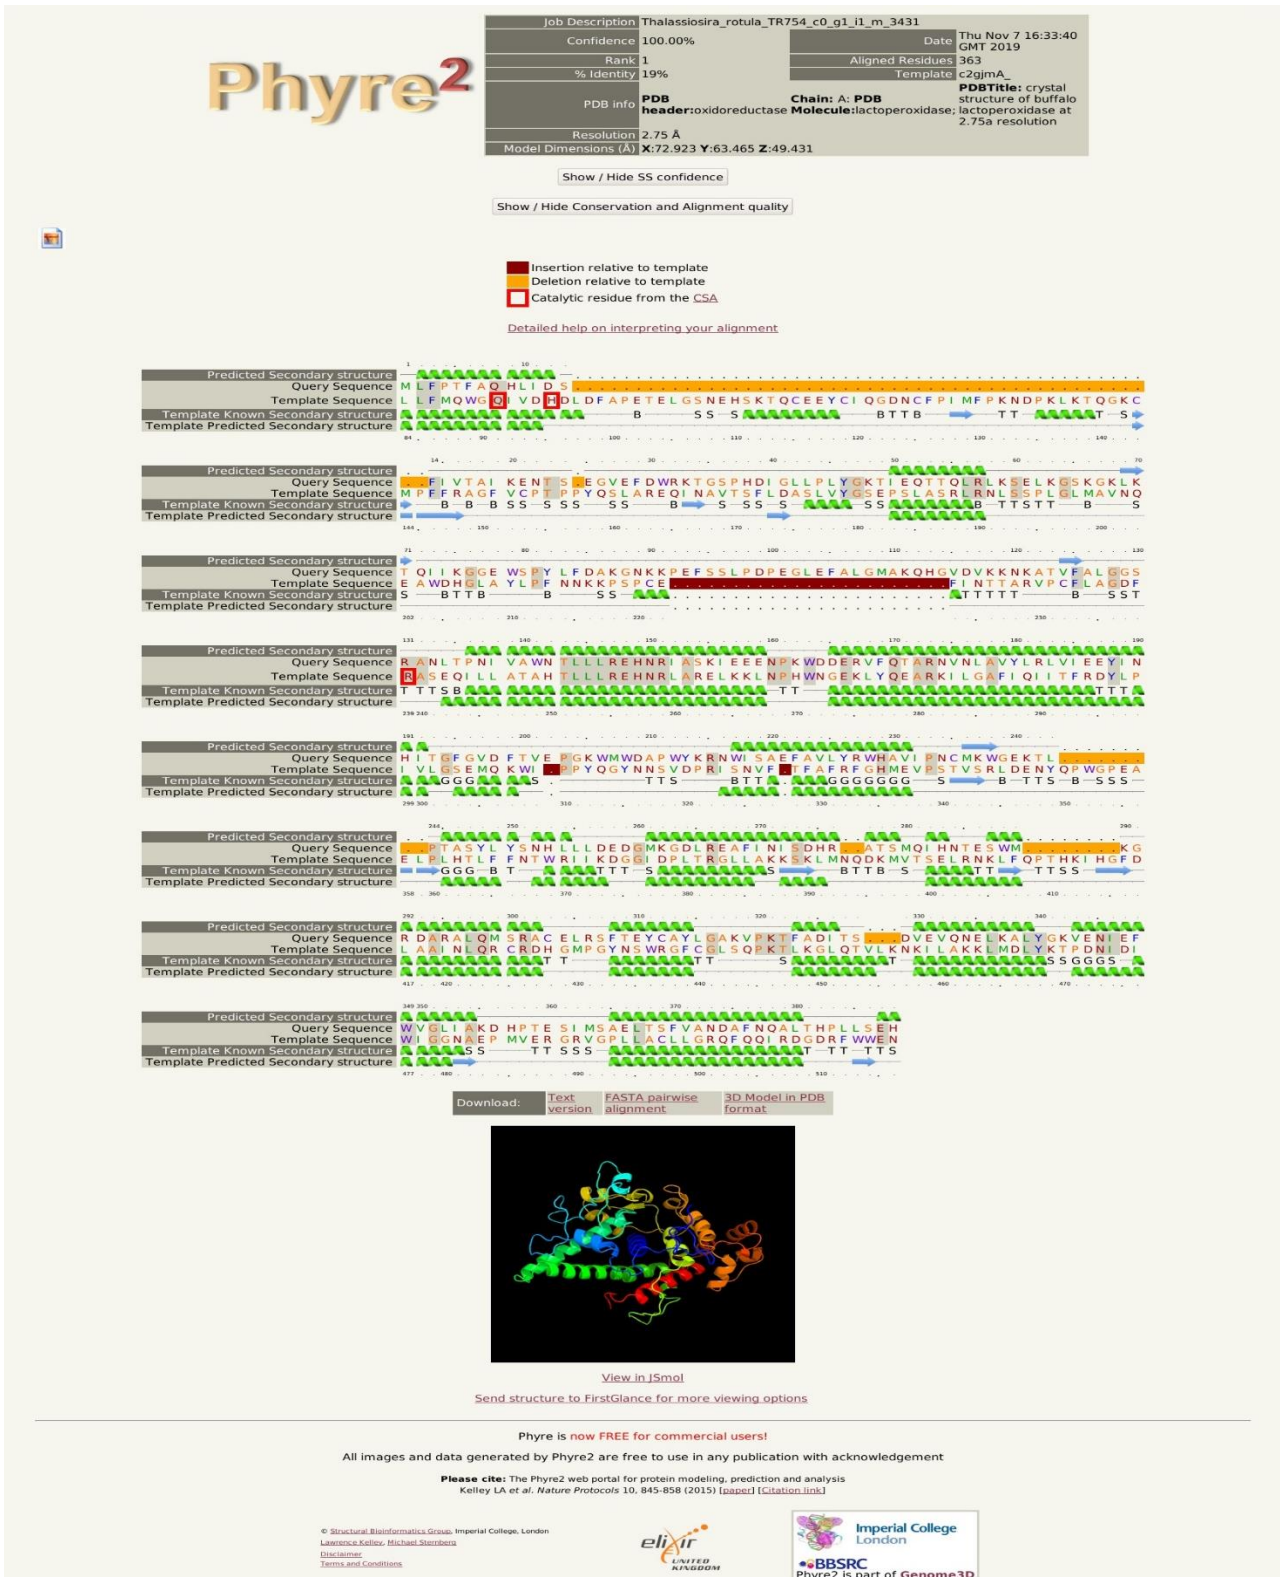

57 **Supplementary figure 3.** Phyre2<sup>1</sup> alignment between *Thalassiosira rotula* (TrotCOX) and *Ovis aries*  
 58 cyclooxygenase (OaCOX).

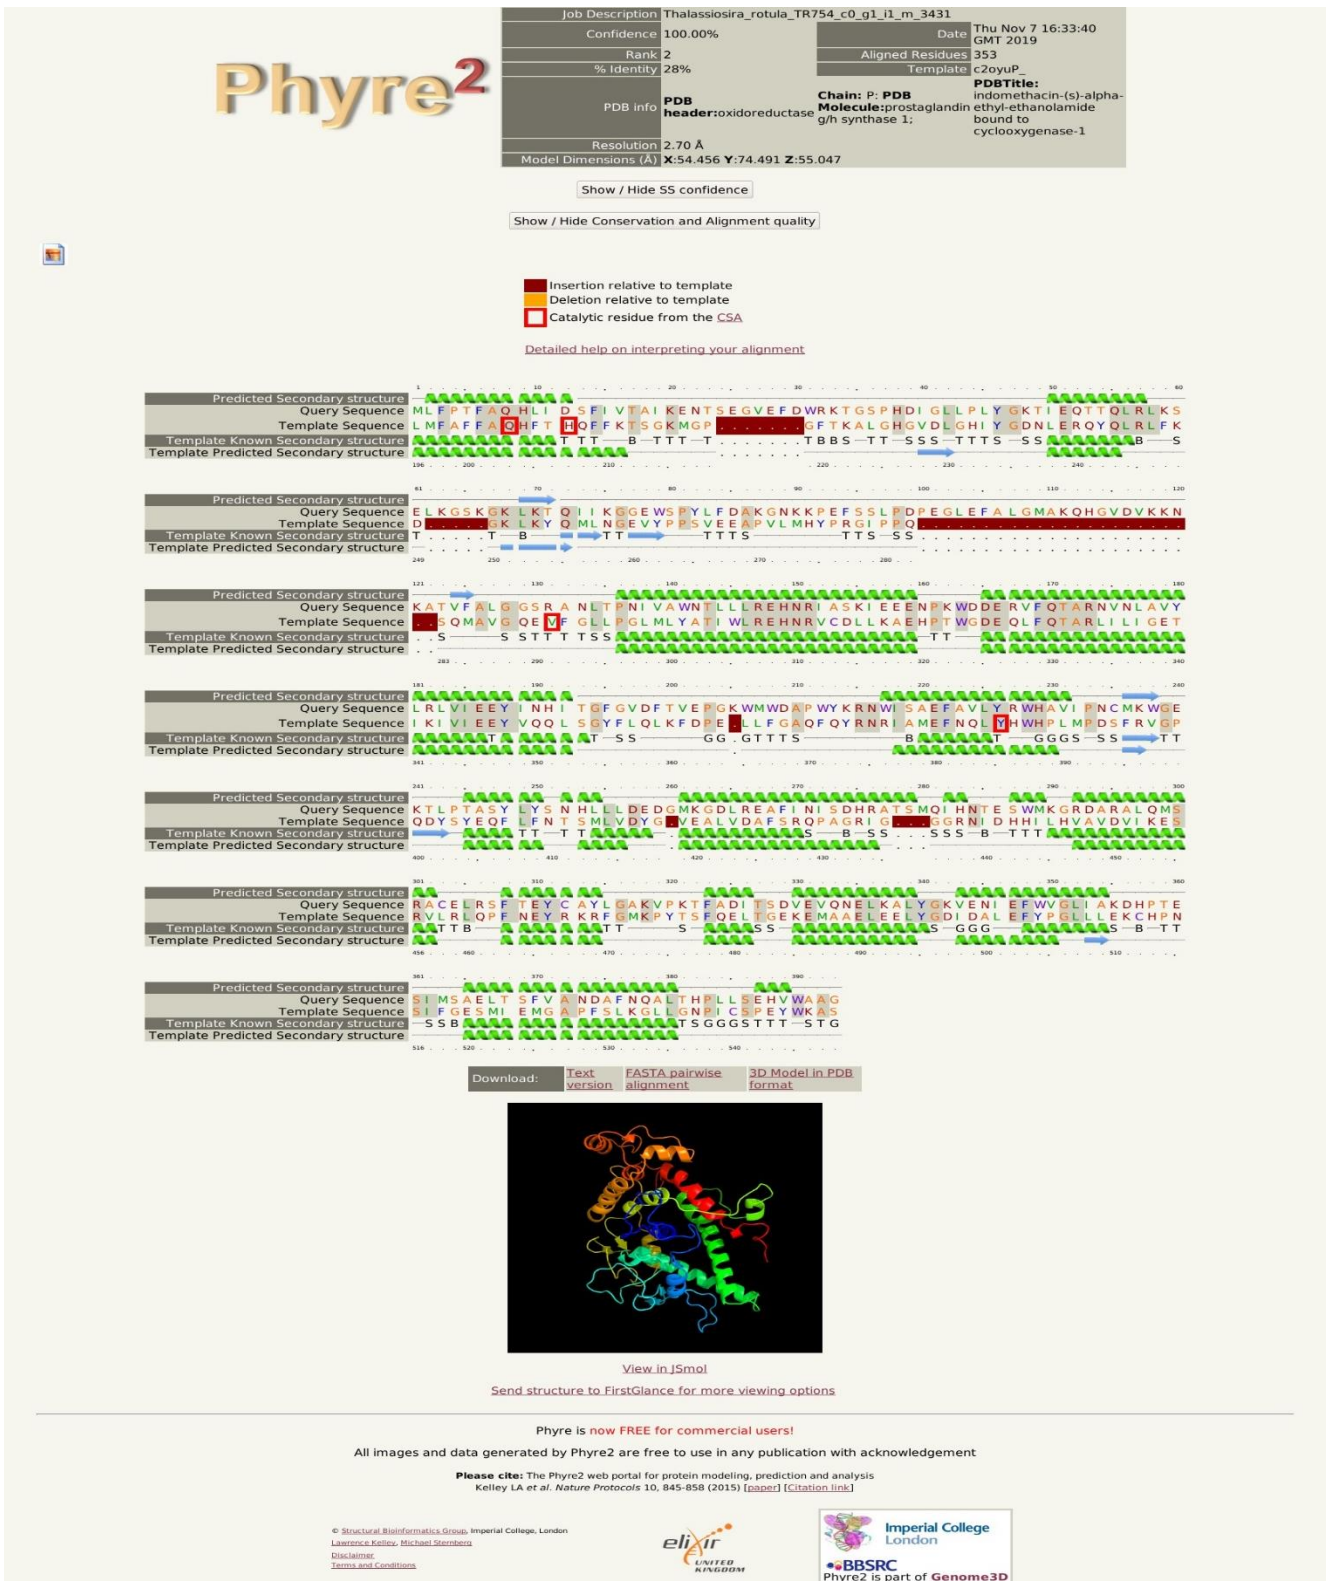

60 **Supplementary figure 4.** Alignment of the diatoms sequences used in the phylogenetic analysis  
 61 (Figure 3, diatoms clade).

62 In red box the *T. rotula* sequence. The red arrow indicate the glutamate residue transformed in  
 63 leucine in diatoms (yellow circle).

64 BtLPO = *Bos taurus* LPO; A.sub = *Aulacoseira subarctica* strain; S.cos = *Skeletonema costatum*;  
 65 S.mar = *Skeletonema marinoi*; D.con = *Detonula confervacea*; T.fra = *Thalassionema frauenfeldii*;  
 66 P.are = *Pseudo-nitzschia arenisensis*; C.men = *Cyclotella meneghiniana*; Odont = *Odontella*; T.rot  
 67 = *Thalassiosira rotula*; C.cur = *Chaetoceros curvisetus*; C.deb = *Chaetoceros debilis*; C.aff =  
 68 *Chaetoceros affinis*; A.gla = *Asterionellopsis glacialis*; C.neo = *Chaetoceros neogracile*.

69  
 70

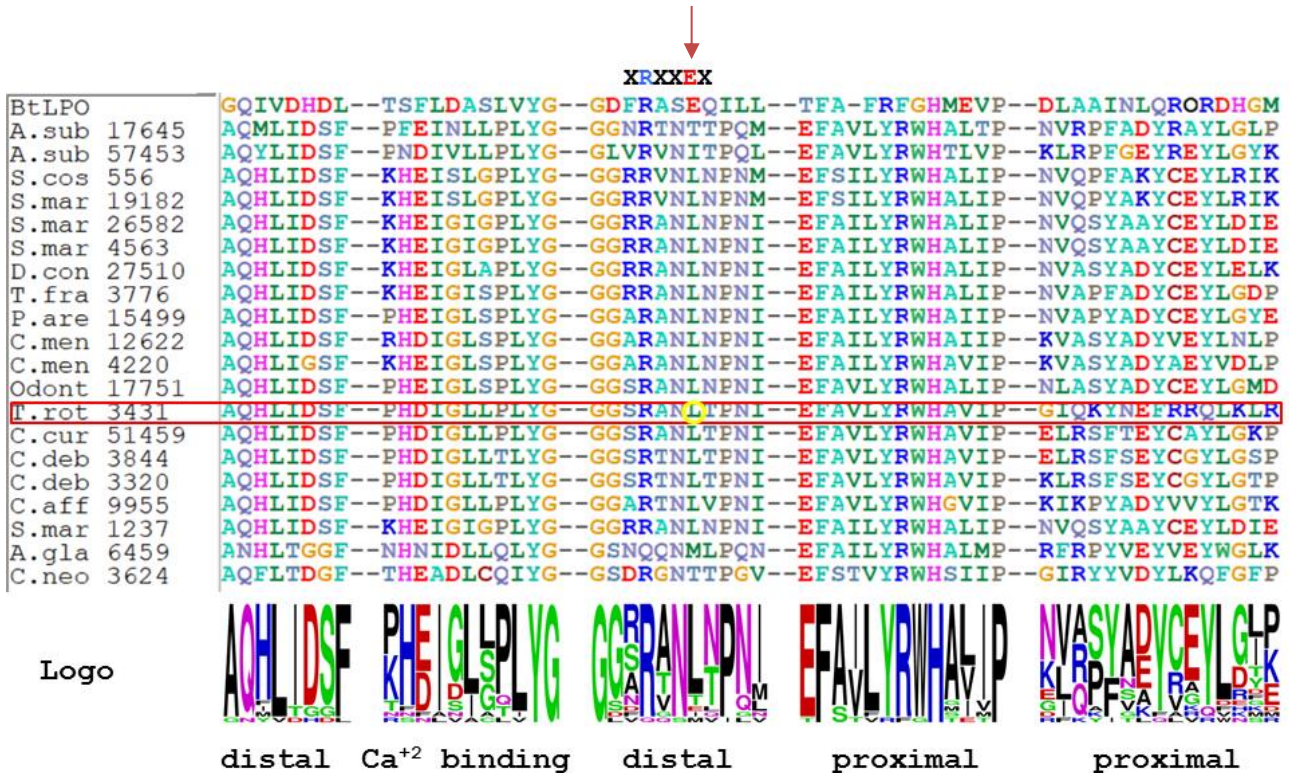

71

72 **Supplementary table 1: List of species and sequences IDs used in the phylogenetic analysis.**

| <b>Species</b>                           | <b>Annotation</b>          | <b>Sequence ID</b>          |
|------------------------------------------|----------------------------|-----------------------------|
| <i>Chaetoceros neogracile</i>            |                            | MMETSP0751-20121128_3624    |
| <i>Asterionellopsis glacialis</i>        |                            | MMETSP0707-20130614_6459    |
| <i>Aulacoseira subarctica</i>            |                            | MMETSP1064-20121228_17645   |
| <i>Aulacoseira subarctica</i>            |                            | MMETSP1064-20121228_57453   |
| <i>Chaetoceros affine</i>                |                            | MMETSP0090-20130426_9955    |
| <i>Chaetoceros curvisetus</i>            |                            | MMETSP0717-20131115_51459   |
| <i>Chaetoceros debilis</i>               |                            | MMETSP0149-20130528_3320    |
| <i>Chaetoceros debilis</i>               |                            | MMETSP0150-20130528_3844    |
| <i>Odontella</i>                         |                            | MMETSP0015_2-20120614_17751 |
| <i>Cyclotella meneghiniana</i>           |                            | MMETSP1057-20121228_4220    |
| <i>Cyclotella meneghiniana</i>           |                            | MMETSP1057-20121228_12622   |
| <i>Pseudo-nitzschia arenysensis</i>      |                            | MMETSP0329-20121206_15499   |
| <i>Thalassionema frauenfeldii</i>        |                            | MMETSP0786-20121207_3776    |
| <i>Skeletonema marinoi</i>               |                            | MMETSP0320-20121206_19182   |
| <i>Skeletonema costatum</i>              |                            | MMETSP0013_2-20120614_556   |
| <i>Detonula confervacea</i>              |                            | MMETSP1058-20130122_27510   |
| <i>Skeletonema marinoi</i>               |                            | MMETSP1039-20121108_4563    |
| <i>Skeletonema marinoi</i>               |                            | MMETSP0319-20121206_26582   |
| <i>Skeletonema marinoi</i>               |                            | MMETSP0562-20121206_1237    |
| <i>Skeletonema marinoi</i>               |                            | MMETSP1428-20130617_783     |
| <i>Synedropsis recta</i>                 |                            | MMETSP1176-20130426_10672   |
| <i>Nostoc</i> sp.                        | COX-1                      | WP015113127                 |
| <i>Chaetoceros</i> cf. <i>neogracile</i> |                            | MMETSP1336-20130426_1470    |
| <i>Grammatophora oceanica</i>            |                            | MMETSP0009_2-20130614_5553  |
| <i>Gersemia fruticosa</i>                | COX-A                      | AAF93168                    |
| <i>Gersemia fruticosa</i>                | COX-B                      | AAS48061                    |
| <i>Plexaura homomalla</i>                | 5S-specific-cyclooxygenase | AAU87497                    |
| <i>Plexaura homomalla</i>                | COX-1                      | AAF93169                    |
| <i>Gammarus</i> sp.                      | COX-1                      | ADB65786                    |
| <i>Caprella</i> sp.                      | COX-1                      | ADB65785                    |
| <i>Nitzschia</i> sp                      |                            | MMETSP0014_2-20120614_6887  |
| <i>Skeletonema marinoi</i>               |                            | MMETSP0319-20121206_1511    |
| <i>Pseudo-nitzschia pungens</i>          |                            | MMETSP1061-20121228_74475   |
| <i>Thalassiosira rotula</i>              |                            | TR754 c0_g1_i1 m.3431       |
| <i>Skeletonema marinoi</i>               |                            | MMETSP0920-20130426_33289   |
| <i>Fragilariopsis kerguelensis</i>       |                            | MMETSP0907-20130614_13332   |
| <i>Skeletonema grethae</i>               |                            | MMETSP0578-20130828_1168    |
| <i>Staurosira</i> sp.                    |                            | MMETSP1361-20130828_23824   |

|                                              |                   |                           |
|----------------------------------------------|-------------------|---------------------------|
| <i>Skeletonema marinoi</i>                   |                   | MMETSP1428-20130617_31509 |
| <i>Homo sapiens</i>                          | COX-1             | NP000953                  |
| <i>Ovis aries</i>                            | COX-1             | NP001009476               |
| <i>Homo sapiens</i>                          | COX-2             | NP000954                  |
| <i>Coccotylus truncatus</i>                  | COX-1             | AFN20596                  |
| <i>Ciona intestinalis</i>                    | COX-a             | XP002127674               |
| <i>Ciona intestinalis</i>                    | COX-b             | XP002123273               |
| <i>Oncorhynchus mykiss</i>                   | COX-1             | CAC10360.1                |
| <i>Fistulifera solaris</i>                   | Alpha-dioxygenase | GAX23950.1                |
| <i>Cyanothece</i> sp.                        | Heme peroxidase   | ACB53655.1                |
| <i>Fistulifera solaris</i>                   |                   | GAX18717.1                |
| <i>Alcanivorax nanhaiticus</i>               |                   | WP_035233415.1            |
| <i>Hordeum vulgare</i> subsp. <i>vulgare</i> |                   | BAJ90503.1                |
| <i>Triticum aestivum</i>                     |                   | CDM84254.1                |
| <i>Rhizophagus clarus</i>                    |                   | GBC07128.1                |
| <i>Emiliana huxleyi</i>                      |                   | XP_005780718.1            |
| <i>Rhodococcus gordoniae</i>                 |                   | WP_064063209.1            |
| <i>Herbidospora mongoliensis</i>             |                   | WP_066371138.1            |
| <i>Eutrema halophilum</i>                    |                   | BAJ34623.1                |
| <i>Pisum sativum</i>                         | Alpha-dioxygenase | CAH05011.1                |

74 **External standard calibration method for PG quantization.**

75 For an external standard quantitation, known data from a calibration standard and unknown data from  
76 the sample are combined to generate a quantitative report. Working standard solutions containing all  
77 the analytes at 1  $\mu\text{g}/\text{mL}$  were prepared, from stock solutions of 100  $\mu\text{g}/\text{mL}$  for each standard: PGE<sub>2</sub>,  
78 15-d-PGJ<sub>2</sub>, PGB<sub>2</sub>, PGD<sub>2</sub>, PGJ<sub>2</sub> (SIGMA ALDRICH, Saint Louis, MO), 20-oh-PGE<sub>2</sub>, 6-keto-PGF<sub>1 $\alpha$</sub> ,  
79 DHK (CAYMAN CHEMICAL, Michigan, USA). From these standard solutions, five solutions at  
80 different concentration levels were prepared: 1, 5, 25, 50, 100 ng/mL for the construction of the  
81 calibration curves. The coefficients of determination (R<sup>2</sup>) were used to evaluate the linearity of the  
82 calibration ranges. All R<sup>2</sup> were greater than 0.99, demonstrating that the method was linear in the  
83 range of calibration for all analytes.

84 The amount of prostaglandins was normalized by the sampled volume extracted for each daily  
85 replicate and then by the number of cells per mL for each replicate. The final value reported in the  
86 graph were pg cell<sup>-1</sup>.

87

88 **Supplementary figure 5: calibration curve of deuterated prostaglandin E2 (PGE2-d4) used as**  
89 **internal standard.**

90

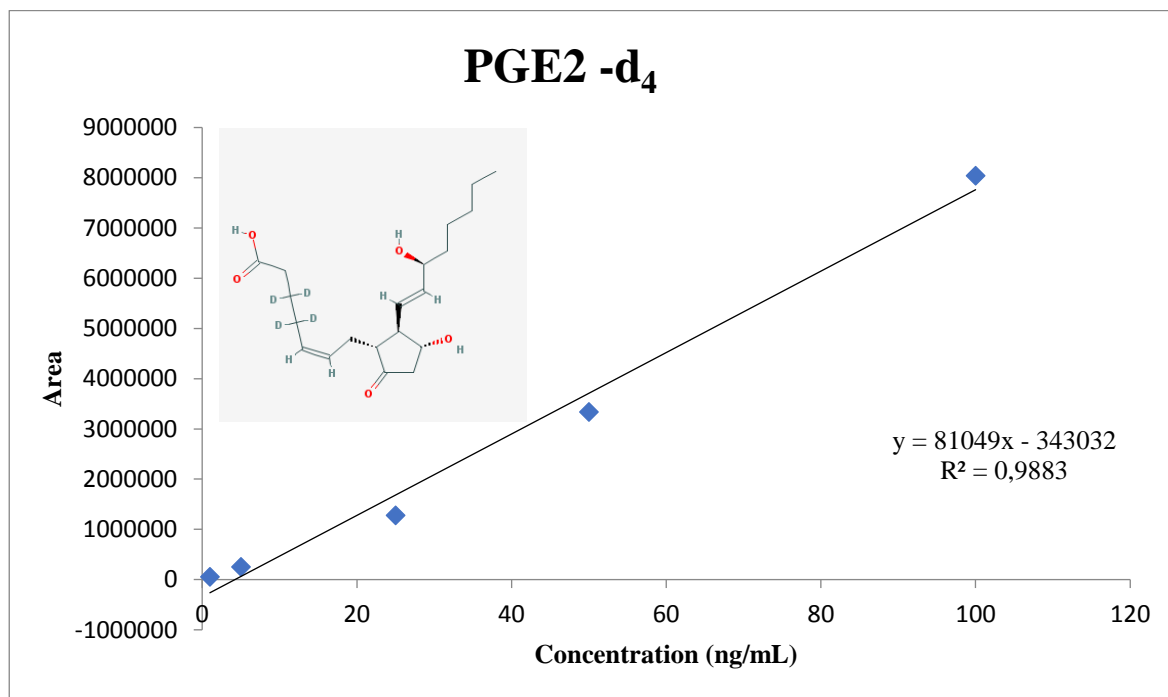

91

92



93 **Supplementary figure 6: calibration curve of prostaglandin E2 (PGE2) used as standard.**

94

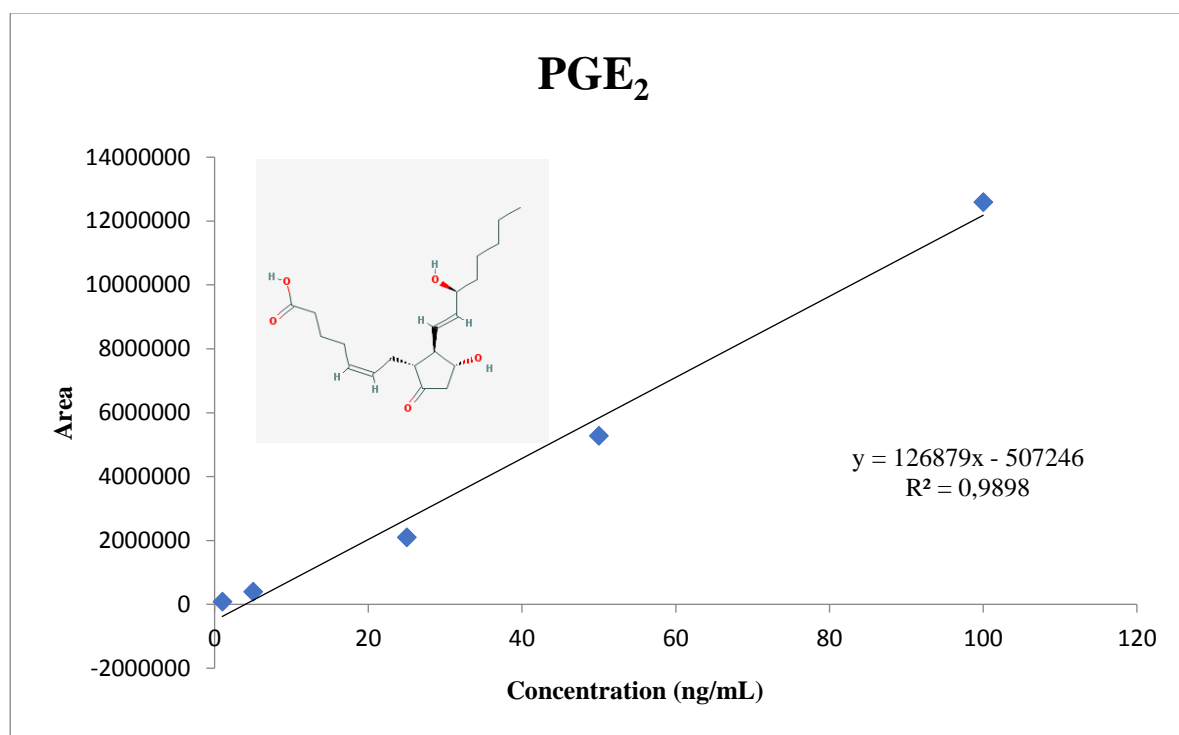

95

96

97 **Supplementary figure 7: calibration curve of prostaglandin B2 (PGB2) used as standard.**  
98  
99  
100

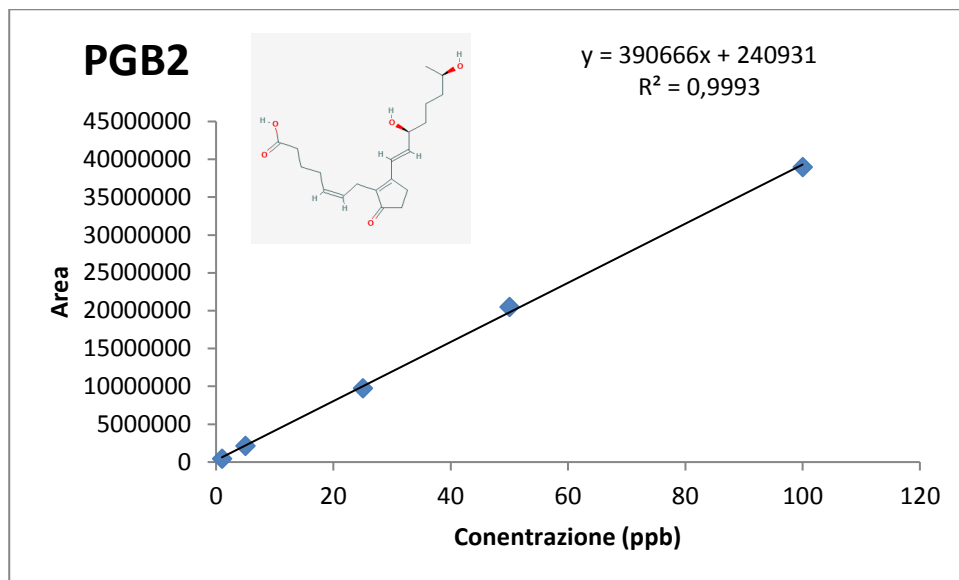

101

102

103

104 **Supplementary figure 8: calibration curve of 15-Deoxy-Delta-12,14-prostaglandin J2**  
105 **(15dPGJ2) used as standard.**  
106

107

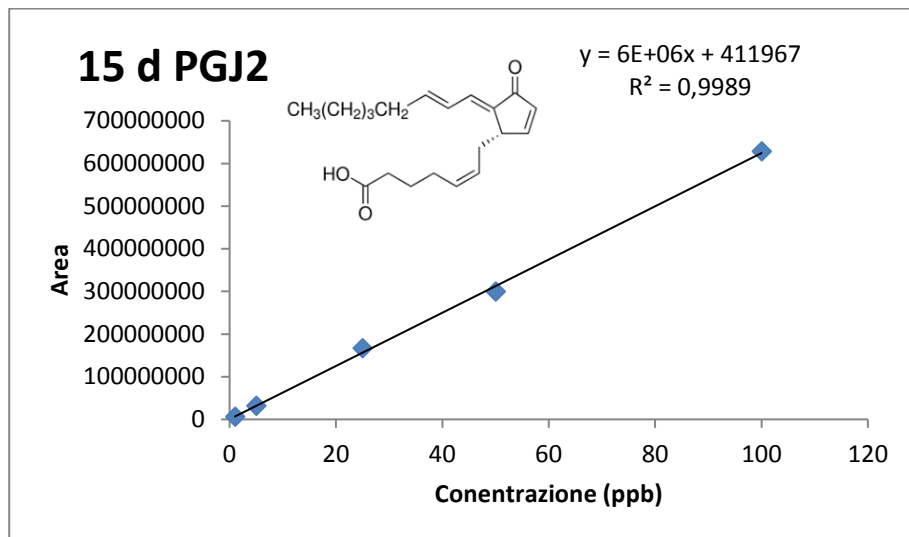

108

109 **Supplementary figure 9: examples of TIC chromatograms.**

110 **a.** a representative sample from the LC-MS/MS analysis of the culture medium and XIC  
111 chromatogram;

112 **b.** PGEM (327 m/z precursor ion; 291 m/z and 309 m/z daughter ion) peaks.  
113

114

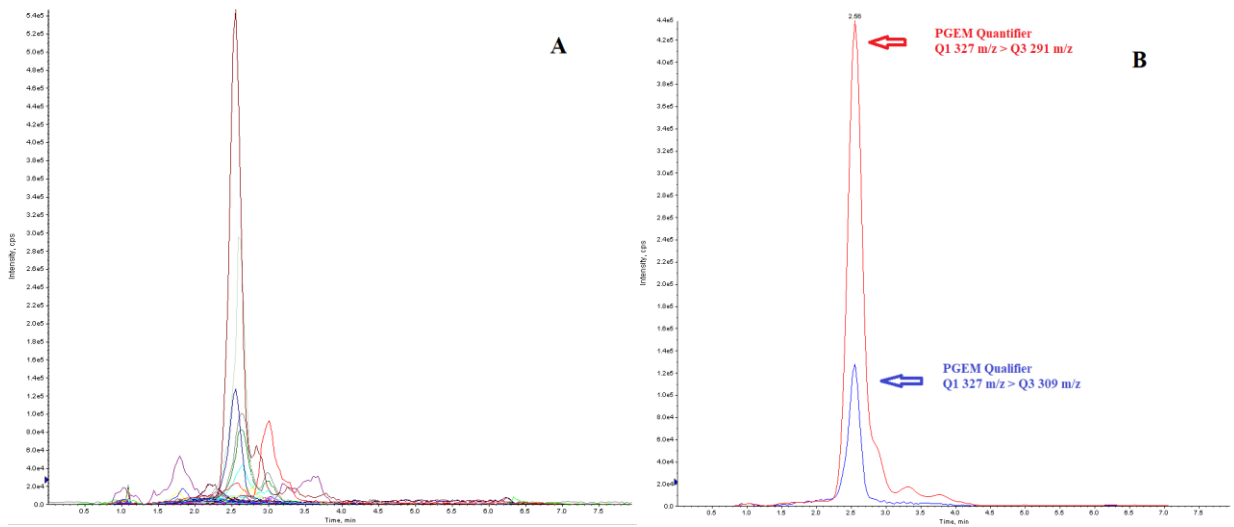

115

116

117 **Supplementary table 3.** List of PGs identified in the culture medium with their LC-MS/MS  
 118 parameters.

| <b>Molecule ID</b>                   | <b>rt</b> | <b>Q1</b> | <b>Q3</b> | <b>DP</b> | <b>CE</b> |
|--------------------------------------|-----------|-----------|-----------|-----------|-----------|
| <b>PGE<sub>1</sub></b>               | 1,13      | 353       | 235       | -60       | -29       |
| <b>15-d-PGD<sub>2</sub></b>          | 2,14      | 333       | 271       | -60       | -22       |
| <b>15-d-PGJ<sub>2</sub>*</b>         | 2,21      | 315       | 203       | -60       | -20       |
| <b>PGE<sub>3</sub></b>               | 2,28      | 349       | 269       | -60       | -24       |
| <b>PGE-M</b>                         | 2,56      | 327       | 291       | -60       | -23       |
| <b>PGA<sub>2</sub></b>               | 2,64      | 333       | 271       | -60       | -20       |
| <b>PGB<sub>2</sub>*</b>              | 2,69      | 333       | 271       | -60       | -25       |
| <b>PGF-M</b>                         | 2,7       | 329       | 293       | -60       | -25       |
| <b>2,3-dinor-11b-PGF<sub>2</sub></b> | 3,05      | 325       | 227       | -60       | -22       |
| <b>PGD<sub>1</sub></b>               | 3,14      | 353       | 271       | -60       | -29       |
| <b>PGD<sub>3</sub></b>               | 3,14      | 349       | 269       | -60       | -20       |
| <b>PGE<sub>2</sub>*</b>              | 3,23      | 351       | 272       | -60       | -23       |

119  
 120 ID: official abbreviated prostaglandin names; Q1: precursor ion (*m/z*) selected in quadrupole Q1; Q3:  
 121 fragment ion (*m/z*) selected in quadrupole Q3; Q1>Q3: transition pairs utilized for quantification; DP:  
 122 declustering potential; CE: collision energy for each molecule; rt: Liquid Chromatography retention  
 123 time in minutes. Asterisks indicate prostaglandins identified by comparison with their own standard  
 124 reference. The non-asterisk one indicates the prostaglandins identified by comparison with literature  
 125 data

126

127 **Aligned sequences, with gap, utilized in the phylogenetic analysis**

128

129 **Chaetoceros neogracile MMETSP0751-20121128\_3624**

130 MVFPNFAQFLTDGFAK-----SIPG-----  
131 TNFLRNNAHEADLCQIYGRNKDQTDCLRLMS-SSIGEEKGRLKSCMING-----  
132 EEWPMPYFLESGEVDP-----QFERLDPPKFSFDHVIEQLSRIDPNGRGLVQ-  
133 -----KIKKNIFA VGS DRGNTTPGVAAAFASLFLREHNRLAAEVENR-----NPA--  
134 ----WDDGQIFQTARNINIVIYIRIIMEDYLNQLSHAP-----  
135 ----FDFKLDPGPWTWDAKWNKK-----FRVA VEFSTVYR-WHSIIPNAIQIGE-----  
136 GDPLPIMQAMFNNELLIDR-----TLLKSFEDSSSRATSFTPFNTAD-----  
137 IMLPREYNTILQARQAGIRYYVDYLKQGFVPDLPKNYS DITS-DEKVQ-----  
138 KMLEEMYGKG--NVDKVEFYIGAICATHERN-A----  
139 PFSLFMNLQVAHDAIKAFYMNPLLQRSSWK----

140

141 **Asterionellopsis glacialis MMETSP0707-20130614\_6459**

142 MILPTFANHLTGGFIK-----STRG--PDGS-----  
143 YQYGRTHSNHNIDLLQLYGR TQEQTALRLRDNTTFGKKGRLKSQLNG----  
144 GEEWPPFLYKDGRIDPQ-----FEVLDPIAHGMSHLVDIMEGD-----  
145 -----RSKFFAMGSNQQNMLPQNIAMTTLFLREHN RVAGELERR-----YSD-----  
146 WDDDRIFETARNIVIVIYLYKIVIEEYINHISPLP-----  
147 DIVKFLVDPGPWMWNAEWNKP-----NWISAEFAILYR-WHALMPNKVMHA-----  
148 GIVFDLSSTLFQHDLLLGED---RSLKKT FVDM SAQRSASCECLNTAG-----  
149 PLVEREVESLRYSRALRFRPYVEYVEYWGLK--KPRRFEDITK-NAEVA-----  
150 SMLRDLYGT---VDKVEFFVGLIASDHSKN-G----  
151 IFGSSMNIGVGLDAFSQALTNPLLSEHVWK----

152

153 **Aulacoseira subarctica MMETSP1064-20121228\_17645**

154 MLFPVFAQMLIDSFIS-----TVTYTNTTTK---  
155 KLTFDWKRTNSPFEINLLPLYGRFEYQTDALRLKS-EKS--RGRLKSQIING-----  
156 EEYAEFLYNDLGEIKD-----EFQVLGPPQA-FNQILSKVDKTEEEKR-----  
157 -----KIKSKIFAFGGNRTNTTPQMAALNTLFLREHNRLAGQLEKH-----NED-----  
158 WDDDRVFQTARNINLVIYLYKIIIEEYINHITSS-----  
159 GARFKVQPKEWVWNADWNKP-----NWIAVEFAVL YR-WHALTPNSYLWE-----  
160 GKRVKISDDL FNNALLLET---SGGLRQAI AEISKNPATIMAPFNTAL-----  
161 ELLSQEQAAFAQTRQANVRPFADYRAYLGLP--LVKTFKDITQ-DKEVQ-----  
162 QKLEELYKT---PDRVEFWAGLVAEDKDPK-A----  
163 IFGPTLSTLVALDAFSQAL THPLLSEQVFN----

164

165 **Aulacoseira subarctica MMETSP1064-20121228\_57453**

166 MLFPVFAQYLIDSFIL-----TKRIKTEGGT---VSTIDWKRSDSPNDIVLLPLYG-  
167 FKNATDALRLKS-EEAQKRGKLSQLIDG-----EEYAPFLYDESGMVKE-----  
168 EFKALG-EPESLGEILKAMMADSNTVK-----  
169 KYKSKIFAFGLVRVNITPQLAAMNTLFLREHNRLAGVLEEN-----NPE-----  
170 WDDERVFQTARNINLVIYLYKIVIEEYINHIS-----  
171 GVQFKAKPEKWIWHASWNKP-----NWISVEFAVL YR-WHTLVPNSDEWN-----  
172 GIRYDFQNEIFNNEILLD-----AGGLRHSFASISANRAPSICPFNTGG-----  
173 FLLPREASALQQSRV NKL RPFGEYREYLYGK--KTKEFS DISS-DPQVQ-----

174 ETLRKLYKT---PDRVEFYAGLIAEDHVAK-G---  
 175 ILAPIMTDLVAKDAFTQALHPLLSNVFN----  
 176  
 177 **Chaetoceros affine MMETSP0090-20130426\_9955**  
 178 MLFPTFAQHLIDSFIV-----TAVKSDGGSG---  
 179 TEFEWKKTDSPHDIGLLPLYGRTFDQTKQLRVQN-PPRGKYGQLKSQIIHG-----  
 180 EEYAPYLYDADGKVKK-----EFDLLE-TPQGLERSLSMLSPE--DAKA-----  
 181 -----K-KSNIFAFGGARTNLVFNITAWNTLLLREHNRIAQTIEKE-----EPT-----  
 182 WDDERVFQTARNVLLVIYLKLVVEEYINHITGY-----  
 183 ---GIDFTVDPGKWMWNAPWYKR-----NWISAEFAVLYR-WHGVIPSCMKWG-----  
 184 DKTLSTHESLFNNAVLTED--MKGSLRDTFINISNHRATQMNLFNTE-----  
 185 MMVLRDMAALKQCRACKIKPYADYVVYLGTKR-RPTKFSISK-DKEVQ-----  
 186 EALEKVYKK---VENVEFWTGLLASDNPPE-G---  
 187 IMSPEMTTFVANDAFNQALCHPLLSNVWS----  
 188  
 189 **Chaetoceros curvisetus MMETSP0717-20131115\_51459**  
 190 MLFPTFAQHLIDSFIV-----TAIKENSSEG---  
 191 VVFNWRKTGSPHDIGLLPLYGKTIEQTTQLRLKS-EVKGSKGRMKTQIIKG-----  
 192 GEWSPYLFDSKGNKKA-----EFSSLP-DPEGLEFALMEAKKFGVDAEK-----  
 193 -----N-KASVFALGGSRANLTPNIVAWNTLLLREHNSIAAKIEAE-----NPE-----  
 194 WDDERVFQTARNVNLAVYLRLVIEEYINHITAF-----  
 195 --GVDFTVEPGKWMWDAPWYKR-----NWISAEFAVLYR-WHAVIPNCMKWG-----  
 196 EKTLPTAAYLYSNHLLDDT-GLKGDREAFINISNHRATSMEIHNSEK-----  
 197 WMTGRDSRALQMSRECELSFTEYCAYLKGP--VPKTFADITS-DVEVQ-----  
 198 NELKALYK---VENVEFWVGLIAKDHPTE-A---  
 199 IMSAELTTFVANDAFNQALHPLLSSEHVWP----  
 200  
 201 **Chaetoceros debilis MMETSP0149-20130528\_3320**  
 202 MLFPTFAQHLIDSFID-----TVYHYDDDG---  
 203 VVFDWKRKTETPHDIGLLTLYGKTIPETKQLRKQS-ETSGEKGLKLSQLVNG-----  
 204 EEWAPFLYDSNGKVKE-----EFNELP-VPQGIDEKMYAARPQ-VQAKL-----  
 205 -----K-ESIFAFFGGSRTNLTPNISAWNTLLLREHNRIAGLIEE-----NPT-----  
 206 WDDERVFQTARNCTLVIYLRLVIEEYINHITAY-----  
 207 -GVDFEIEPEKWMWDAPWYKR-----NWISAEFAVLYR-WHAVIPSLMKWG-----  
 208 KNTHTTMDYLFNNLLSDD-GMKGNLRDCFHNICDHRAATNMQLHNSEGG-----  
 209 FMVGRDKSALEMSRSCKLRSFSEYCGYLGTP--APESFADITQ-DKDLQ-----  
 210 KELKDVEYGE---VKNVEFWTGLIAKDHSCA-A---  
 211 IMSAELTKFVANDAFNQALHPLLSSEHVFN----  
 212  
 213 **Chaetoceros debilis MMETSP0150-20130528\_3844**  
 214 MLFPTFAQHLIDSFID-----TVYHYENDGN---  
 215 IVFDRKLTGTPHDIGLLTLYGKTIPETKQLRKQS-DTSGEKEKICPNLLKE-----  
 216 KSXAPFLYDSNGKVKE-----EFNKLP-VPQGIDGKMYAARPQ-VRAKL-----  
 217 -----K-ESIFAFFGGSRTNLTPNISAWNTLLLREHNRIAGLIEE-----NPT-----  
 218 WDDERVFQTARNCTLVIYLRLVIEEYINHITTY-----  
 219 -GVDFKIEPEKWMWDAPWYKR-----NWISAEFAVLYR-WHAVIPSLMKWG-----  
 220 KNTHTTMEYLFNNLLSDD-GMKGNLRDCFHNICDHRAATNMQLHNSEGG-----  
 221 FMVGRDKSALEMSRSCELRSFSEYCGYLGSP--APESFADITQ-DKDLQ-----

222 KELKDVYGE----VKNVEFWTGLIAKDHSC-E-A----IMSAELTKFVANDAFNXGFD----  
223 SSSPFR----  
224  
225 **Odontella MMETSP0015\_2-20120614\_17751**  
226 LLFPTVAQHLIDSFN-----TKYTKTING-----  
227 TFFDWARDTSPHEIGLSPLYGCPNKQTSQLRELN-EKIGCKGRLKTQILGD---  
228 GGEEWAPFLYGDSGKIKAE-----EFNELD-EPVALDHILGFNSENAEMMR-----  
229 -----KSIFAFGGSRANLNPNIWAWNTLLLREHNRVASKIEAS-----EPS-----  
230 WDDERVFQTARNVVLVIYLVKIVIEDYVAHIS-----  
231 GVNFKVQPGCEWWMWNAKWYKR-----NWMSVEFAVLYR-WHALIPNTTFWG-----  
232 SKTASTKDALYNNTLLLNEQGCAGNLRNIMVQISEQRITSFQLNNTED-----  
233 WLVDRLNALRQSRECNLASYADYCEYLGMD--RPKTFDISL-YPEVQ-----  
234 EKLRSLYKT---ADKVEFYVGLIAADHSPGGK----  
235 LFSEAMTRFVANDAFNQALANPLLESENWVK----  
236  
237 **Cyclotella meneghiniana MMETSP1057-20121228\_4220**  
238 LLFPTFAQHLIDSFN-----  
239 TRIDHEATEKNGGRPVFDWARDTSKHEIGLSPLYGDTTEQLNQLRLLS-  
240 NVNGFKGLMKTQIINE-----EEWAPFLYEVDGSKKK-----EFSAIW-  
241 DPSGASYVLGMRRDVGERQK-----  
242 RTLFAFGGARANLNPNIWAWNTLLLREHNRIAGEIEKS-----EPS-----  
243 WDDERVFQTARNVLLVVIYLVKLVIEEYIAHIA-----  
244 GVNFKVDPGEWWMWNAWAKT-----NWMSTEFAILYR-WHAVIPNTSSWGK-----  
245 AKNLKVLDTLNFNDLLLDTKEGLSGNLRDAFVSISEERVTAHQLFNTEE-----  
246 WMVDRELAAIKQGRANKVASADYAEYVDLP--RPKTFADISL-YPEVQ-----  
247 KALEEVYGT---VDRVEFYVGLIAVDMGAGGK---IFSP-  
248 MTKFVANDAFNQALTNPLLSMNWVN----  
249  
250 **Cyclotella meneghiniana MMETSP1057-20121228\_12622**  
251 LLFPTFAQHLIGSFN-----  
252 TKIDHEATEKNGGQVIFDWAKTYSRHDIGLSPLYGDTTEQTDQLRLMS-  
253 NVTGFKGRMKTQLIND-----EEWAPFLYRVDGTTKKP-----EFNAIW-  
254 DPAGASHVLKMRGEEGFKQK-----  
255 RTLFAFGGARANLNPNIWAWNTLLLREHNRLAGEIEKS-----EPS-----  
256 WDDERVFQTARNVNIVIYLVKLVIEEYIAHIS-----  
257 GADFKVDPGEWWMWNAWNA-----NWMSVEFAILYR-WHAIIPNTINWG-----  
258 TSNMKVSDILFNDLLVKETEGLDANLRDVFVQMSEQRATAHQLFNTEE-----  
259 WLLDRELAAVTQGRANKVASADYVEYLNLP--RPKTFADISL-YPEVQ-----  
260 NALKEVYGT---VARVELYVGLIAADMAGGK---IFSL-  
261 MTKFVANDAFNQALTNPLLSQNVVK----  
262  
263 **Pseudo-nitzschia arenysensis MMETSP0329-20121206\_15499**  
264 LLFPTVAQHLIDSFN-----THVDRKATEAKG-  
265 SPVFNWAKTDSPEIGLSPLYGDSKEQTDQLRERS-EEVGRKGRLKSQMIEG-----  
266 EEWSPFLYDSKGNKKT-----EFSKIP-DPSGMSHILKHVNAATAKKA-----  
267 -----SIFAFGGGARANLNPNIWAWNVLLLREHNRLASMIEES-----EPT-----  
268 WDDERVFQTARNVSIVIYLVKIVIEEYIKHIS-----  
269 GANFRVAPGKWLWNAQWNKT-----NWMSVEFAILYR-WHAIIPNSSSWGP-----



270 SKDVEVRESLFNNTLLLDKTKGMGAKLADIFVQISNERTTSFELNNTK-----  
 271 WLVDREMAAIKQGRNTNNVAPYADYCEYLGYE--RPKTFADINR-DPKVQ-----  
 272 EQLKELYGT---PDKVEFYVGLIAGEHPSGGK---IFSK-  
 273 MTSFVANDAFNQALGNPLLSQNVWE----  
 274  
 275 **Thalassionema frauenfeldii MMETSP0786-20121207\_3776**  
 276 LLFPTFAQHLIDSFN-----TRIKADTDKNK--  
 277 PPEFEWTRTDSKHEIGISPLYGDEPAQTKQLRELS-ETSGRKGRLKTQMIEG-----  
 278 EEWAPFLYNGN-NKKP-----EFS DIP-EPDGVRMIEKHG--FGDRS-----  
 279 -----TIFAFGGRRANLNPNI VAWNTLLLREHNRLAAEIEKS-----EPE-----  
 280 WDDERVFQTARNVLTVIYSKIVVEEYVGHIS-----  
 281 GVPFEVQPGPMMWNAEWNKT-----NWM SVEFAILYR-WHALIPDTIRWGP-----  
 282 KVDIGIMKQLFNNTLLLSKENGMGANLKDCFTEISRNRVTSFELFNTEGS-----  
 283 YMATREMQAIRQCRAANVAPFADYCEYLGDP--RPKTFEDISR-KPEVQ-----  
 284 KVLKELYGT---PDRVEFYVGLIAQDHSAGPK---  
 285 IFGDVMTK FVANDAFNQALANPLLSQNVWE----  
 286  
 287 **Skeletonema marinoi MMETSP0320-20121206\_19182**  
 288 LLFPTFAQHLIDSFN-----TKLN-TETG-----  
 289 QFEWDQTESKHEISLGPLYGDDVGQTNQLREKS-EVTGRRGRLKTQILDG---  
 290 GEEWAHFLYDETGTKKE-----EFNLIR-DPDGMKHILKALYNSDPAAKS-----  
 291 -----SIMQTIFAFGGRRVNLNPNMVAWNTLLLREHNRLAGEIERS-----EPS---  
 292 ---WDDERVFQTARNVLIVIYLKLVIEYIGHIS-----  
 293 --GVKFKLDPGEWMWNAPWYKT-----NWMSTEF SILYR-WHALIPNQNLGP-----  
 294 SKDLGVLKSLFNPLLLDEEKGLGGNLRDVFVDICKARITSFQLFNTEK-----  
 295 WMVGREAAATISQGRANNVQPYAKYCEYLRIK--PPKTFKDISL-VPEVQ-----  
 296 QALEELYGT---PDRVEFYVGLIAADHAPG-K---IFSL-  
 297 MTKFVANDAFNQALTNPLLSQNVWE----  
 298  
 299 **Skeletonema costatum MMETSP0013\_2-20120614\_556**  
 300 LLFPTFAQHLIDSFN-----TKLN-TETG-----  
 301 KFEWDQTESKHEISLGPLYGDDVGQTNQLREKS-EVTGRRGRLKTQILDG---  
 302 GEEWAHFLYDETGTKKE-----EFNLIR-DPDGMKHILKALYSSDPAAKS-----  
 303 -----SIMQTIFAFGGRRVNLNPNMVAWNTLLLREHNRLAGEIERS-----EPS---  
 304 ---WDDERVFQTARNVLIVIYLKLVIEYIGHIS-----  
 305 --GVKFKLDPGEWMWNAPWYKT-----NWMSTEF SILYR-WHALIPNQNLGP-----  
 306 SKDLGVLKSLFNPLLLDKEKGLGGNLRDVFVDICKARITSFQLFNTEK-----  
 307 WMVGREAAATINQGRANNVQPF AKYCEYLRIK--PPKTFKDISL-VPEVQ-----  
 308 QALEELYGT---PDRVEFYVGLIAADHAPG-K---IFSL-  
 309 MTKFVANDAFNQALTNPLLSQNVWE----  
 310  
 311 **Detonula confervacea MMETSP1058-20130122\_27510**  
 312 LLFPTFAQHLIDSFN-----TKTKPLESGRL----  
 313 GFEWDQTF SKHEIGLAPLYGDYEEETLQLREKS-EASGRKGRLKTQVLDG---  
 314 GEEWAPFLYDSEGTKKP-----EFSLLP-DPDGLQHIL---AMQPETME-----  
 315 -----KKKKSIFAFGGRRANLNPNI VAWNTLLLREHNRLASEIEKS-----EPS-----  
 316 WDDERIFQTSRNVVIVMYCKIIIEYIKHIS-----  
 317 GVNLRVEPGEWMMWNASWYKP-----NWMSTEF FAILYR-WHALIPNTSSWGA-----

318 SKNIEVVDALFNNNLLISKDTGMGGNLRDAFVEISKTRITSFELFNTEK-----  
 319 AMVQRETA AIEQGRFNNVASYADYCEYLELK--RPETFEDISL-KPEVQ-----  
 320 QALKELYGS---PDRVEFYIGLIAADHPAGGK---  
 321 VFSAAMTKFVANDAFNQALTNPLLSQNAWN---  
 322  
 323 **Skeletonema marinoi MMETSP1039-20121108\_4563**  
 324 LLFPTFAQHLIDSFN----TKIN-VETG-----EFEWDRDTSKHEIGIGPLYGDEVEQTSQLREKS-  
 325 EKPGRRGRLKTQVLEG---GEEWAPFLYNEDGTKKK-----EFSAIH-  
 326 DPDGMKITILGLVYSSDPTTKS-----  
 327 SIEQSIFAFGGRRANLNPVAVWNTLLLREHNRLAGEIEKS-----EPG-----  
 328 WDDERVFQTARNVLIVMYCKIVIEEYIKHIS-----  
 329 GVNFKVEPGPMMWNAPWYKT-----NWMSTEFALYR-WHALIPNEAGLGP-----  
 330 SKDAGVMEALFNNPMLLDDETGLGGNLRDIFVDISQTRVTSLQLFNTEK-----  
 331 WMVERESAAINQGRANNVQSYAA YCEYLDIE--PPKTFEXISM-VPERQ-----  
 332 QALKELYGT---PDRVEFYVGLIAADHPAGGK---IFSE-  
 333 MTKFVANDAFNQALTNPLLSQNVWE---  
 334  
 335 **Skeletonema marinoi MMETSP0319-20121206\_26582**  
 336 LLFPTFAQHLIDSFN----TKIN-VETG-----EFEWDRDTSKHEIGIGPLYGDEVEQTSQLREKS-  
 337 EKPGRRGRLKTQVLEG---GEEWAPFLYNEDGTKKKE-----FSAIEDGTKKEEFSAIH-  
 338 DPDGMKITILGLVYSSDPTTKS-----  
 339 SIEQSIFAFGGRRANLNPVAVWNTLLLREHNRLAGEIEKS-----EPG-----  
 340 WDDERVFQTARNVLIVMYCKIVIEEYIKHIS-----  
 341 GVNFKVEPGPMMWNAPWYKT-----NWMSTEFALYR-WHALIPNEAGLGP-----  
 342 SKDAGVMEALFNNPMLLDDETGLGGNLRDIFVDISQTRVTSLQLFNTEK-----  
 343 WMVERESAAINQGRANNVQSYAA YCEYLDIE--PPKTFEDISM-VPERQ-----  
 344 QALKELYGT---PDRVEFYVGLIAADHPAGGK---IFSE-  
 345 MTKFVANDAFNQALTNPLLSQNVWE---  
 346  
 347 **Skeletonema marinoi MMETSP0562-20121206\_1237**  
 348 LLFPTFAQHLIDSFN----TKIN-AETG-----EFEWDRDTSKHEIGIGPLYGDEVEQTSQLREKS-  
 349 EKPGRRGRLKTQVREG---GEEWAPFLYNKDGTKKE-----EFSAIH-  
 350 DPDGMKITILGLVYSSDPTTKS-----  
 351 SIEQSIFAFGGRRANLNPVAVWNTLLLREHNRLAGEIEKS-----EPG-----  
 352 WDDERVFQTARNVLIVMYCKIVIEEYIKHIS-----  
 353 GVNFKVEPGPMMWNAPWYKT-----NWMSTEFALYR-WHALIPNEAGLGP-----  
 354 SKDAGVMEALFNNPMLLDDETGLGGNLRDIFVDISQTRVTSFQLFNTEK-----  
 355 WMVYRESAAINQGRANNVQSYAA YCEYLDIE--PPKTFEDITM-VPERQ-----  
 356 QALKELYGT---PDRVEFYVGLIAADHPAGGK---  
 357 IFSEAMTKFVANDAFNQALTNPLLSQNVWE---  
 358  
 359 **Skeletonema marinoi MMETSP1428-20130617\_783**  
 360 LLFPTFAQHLIDSFN----TKIN-AKTG-----  
 361 EFEWDKNDKHEIGIGPLYGDEVEQTNQLREKS-EAPGRRGRLKTQVL-E---  
 362 GGEEWAPFLYNEDGTKKK-----EFSAIH-DPDGMKITILGLVYSSDPTTKS---  
 363 -----SIEQSIFAFGGRRANLNPVAVWNTLLLREHNRLAGEIEKS-----EPG---  
 364 --WDDERVFQTARNVLIVMYCKIVIEEYIKHIS-----  
 365 -GVNFKVDPGPMMWNAPWYKT-----NWMSTEFALYR-WHALIPNEAGLGP-----

366 SKDAGVMEALFNNPMLLDDKTGLGGNLRDIFVDISQTRVTSFQLFNTEK-----  
367 WMVYRESAAINQGRANNVQSYAAAYCEYLDIE--PPKTFEDITM-VPERQ-----  
368 QALKELYGT----PDRVEFYVGLIAADHPAGGK----  
369 IFSEAMTKFVANDAFNQALTNPLLSQNVWE----  
370  
371 **Synedropsis recta MMETSP1176-20130426\_10672**  
372 PTKPWLQGQCRGMALR---  
373 FPKRPLPDNLPDAKTLVEDFCIRPDDASFTPCANGVNSLTPYFALCVIHDFFRSDTGRSKV  
374 GKLDLDR---PWVNLHSSYLQTLQTVYGYN-----KKSCASVRTQKHG-----  
375 -----KLTEKKIVDHRLERMAVCHALILVMVKHHNFICDQLMER-----  
376 YPD---KFKTDEMIFQTARLINCQVYINLIELYSCLFHVWN-----  
377 -----EDGSNPVELRGLDYPRDIQGY-----HLSYEFNIMYR-FHAFIPKEWTPFYG-----  
378 -----LKEAIAYLKKGDFTHSVPALSSDDAIKTLVDAMSHRAGANHVPSNVPR-----  
379 -VMGPAEVKGIEDARLLGISTYNDFKEAVGEP--KYDTFLDMSGNRPELA-----  
380 AKLEKHYPT---VDDVEFAVGMRVETRTPLRG----  
381 AGFSTVGRAILADAFSSIRFDRFYSSQSEYH----  
382  
383 **Nostoc sp WP015113127**  
384 MLFPYVWQWFTDSFLR----LDHTN-----  
385 KLKNTSNHEIDL CNVYGLTRKQTHLLRSFQ-----  
386 GGGKFKTQKLRQDGVVEEYPLFYADPAQG-----IVDPQFAGLYE-  
387 PVNDE---KRQPAD-----  
388 KKQYLFAMGVERANVQIGYVMLNTLCLREHNRLCDVLASN-----YPD-----  
389 WDDERLFQTSRNILMAILKIIMEEYINHITPY-----  
390 HFKLFADPEAFTK-ESWYRT-----NHMAIEFDFVYR-WHSAIPETFNCNG-----  
391 KPTHVADTLWNNKILIDQG-----LGALMEETCSQAGTRIGLFNTPNI-----  
392 LVDLAELPSIKLGRQLQLASYNDYREL CGFP--RVTSFDQITG-DEFTQ-----  
393 QKLKEFYGH---VDNIEFFVGLYSEDVRQN-----STIPPVARLIGIDAFSQUALTNPLLSPKIFN---  
394 -  
395 **Chaetoceros cf neogracile MMETSP1336-20130426\_1470**  
396 LMLPIFAQWFTDSFLR----TKFRVDGPQD-----  
397 FKENESNHEIDL CQIYGMTETQTAMLRSM-----NGFLKSQIIDK----EEFPAHLFEETASG---  
398 LV-----QIKPEFAGLYT-EANVQRVFRRASKE-----  
399 HKLNCFAVGIEHGNSTMGNTLMNIIWMREHNRIAREIAKA-----HPT-----  
400 WDDERLFQTARNVNIVLLLKVVVEDYIFHIS-----  
401 GPPFKMDN-KIAEGERWYRS-----NWMAAEFALLYR-WHDLIPDTVEFGG-----  
402 ERKDSSALNKNNRWLMKVG-----VDRACLDASQEPSGKIMLGNTPNF-----  
403 LVEVGKMS-LKQGRVSGLASFNDYCEHYGLK--RKKNFMDLTGNNKEVS-----  
404 KKLEDVYGS---IDNLEWVGLWAEAYDDKTK---CMGP-  
405 LTYMVGND AFTQALTNPLLA AEVFN----  
406  
407 **Grammatophora oceanica MMETSP0009\_2-20130614\_5553**  
408 LLLPMFAQWFTDGFLR----TKWKPPTEQD-----  
409 YVENESTHQIDL NQIYGATEVQTNILRAKK-----GGKLRSQMIKG----EEYPEYLFDTET-----  
410 L-----QIKPEFEGLYS-DVNFTRVFQNVSDE-----  
411 QKKVTFAVGLEHGNSTVANTIMNTLFLREHNRLAGIIEAA-----HKD-----  
412 WDDERIFQTRNCLIVILMKIVINDYVAHIA-----  
413 DAPVFLDAGGFAEDQPWYRE-----NWMSVEFNLLYR-WHDMIPDQVSFTSADQVSFS---

414 SEDEYWDMESSKTLVNNNTLMLELG-----VEQILLDASKQRAGQLGLFNTPDF-----  
415 ---LLHVHKET-MKQCRMINLAPYVDYCKEYGLT--VPKTFRELTGGNLEYA-----  
416 KALESVYDS---VEHVEWFVGLWAGG-KALGQ----  
417 FSSDLLILMVGHDAVTQLFTNPLLSRRVYN----

418  
419 **Gersemia fruticosa AAF93168**  
420 WLFMFFAQHFHTEFFK-----TIYHS-PAFT-----WGN-  
421 HGVDVSHIYGQDMERQNKLSFE-----DGKLSQTING-----EEWPPYLKDVDNVTMQY-----  
422 -----PPNT-----  
423 PEDQKFALGHFPFYSMLPGLFMYASIWLREHNRVCTILRKE-----HPH-----  
424 WVDERLYQTGKLIITGELIKIVIEDYVNHLAN-----  
425 YNLKLTYNP-ELVFDHGYDYD-----NRIHVEFNHMYH-WHPFSPDEYNISG-----  
426 STYSIQDFMYHPEIVVKHG-----MSSFVDSMSKGLCGQMS-HHNHGA-----  
427 YTLDVAVEVIKHQRELRMQSFNNYRKHFALE--PYKSFEELTG-DPKMS-----  
428 AELQEVYGD---VNAVDLYVGGFFLEKGLTT-S---  
429 PFGITMIAFGAPYSLRGLLSNPVSSPTYWK----

430  
431 **Gersemia fruticosa AAS48061**  
432 WLFMFFAQHFHTEFFK-----TIYHS-PAFT-----WGN-HGVDVSHIYGQDIERQNKLSRFQ--  
433 ---DGKLSQMING-----EEWPPYLKDVDNVTMQY-----PPNT-----  
434 -----SEDQKFALGHFPFYGMLPGLFMYASIWLREHNRVCTILRKE-----  
435 -HPH-----WEDERLYHTGKLIITGELIKIVIEDYVNHLAN-----  
436 -----YNLKITYDP-ELVFDHGYDYD-----NRIHVEFNHMYH-WHPFSPDEYNISG-----  
437 -----STYSIHEFMYHPEIVVKHG-----MSSFVDSMSKGLCGQMS-HHNHGA-----  
438 YTLDVAVEVIKHQRELRMQSFNNYREHFALE--PYKSFEEMTG-DPKMA-----  
439 AELQETYGD---VNAVDLYVGGFFLEKGLTT-S---  
440 PFGITMIAFGAPYSLRGLLSNPVSSPTYWK----

441  
442 **Plexaura homomalla AAU87497**  
443 WLFMFFAQHFTHQFFK-----TVHHS-PAFS-----WGN-  
444 HGVDVSHIYGQGVRENKLRFAK-----DGKLSQMING-----EEYPPYLKDVDLKMQY-----  
445 -----LENT-----  
446 AEEQKFALGHPPFSMLPGLFMYATIWLREHNRVCMILRKE-----HPH-----  
447 WEDERIYQTGKLIITGELIKIVIEDYVNHLAN-----  
448 YNMKLRYDP-QLVFSRNYDYD-----NRIHLEFNHLYH-WHPFSPDQFNISG-----  
449 TTYAIKDFMYHPEIVVKHG-----MSSFVNAMSSGLCGKMS-HHNHGQ-----  
450 YTLDVAVEVIKYQRELRMQSFNXYRRHFGLH--AYKSFEEMTG-NPKMA-----  
451 AELKEVYGD---VNAVDLYVGGFFLEKSLTT-S---  
452 PFGITMIASGAPYSLRGLLSNPVSSPTYWK----

453  
454 **Plexaura homomalla AAF93169**  
455 WLFMFFAQHFTHQFFK-----TVHHS-PAFS-----WGN-  
456 HGVDVSHIYGQGVRENKLRFAK-----DGKLSQMING-----EEYPPYLKDVDGLKMQY-----  
457 -----LENT-----  
458 AEEQKFALGHPPFSMLPGLFMFATLWLREHNRVCMILRKE-----HPH-----  
459 WEDERIYQAKLIITGETIKIVIEDYINHLAN-----  
460 YNMKLRYDP-QLVFSRNYDYD-----NRIHLEFNHLYH-WHPFSPDQFNISG-----  
461 TTYTINDFMYHPEIVVKHG-----MSSFVNAMSSGLCGKMS-HHNHGQ-----

462 YTLDVAVEVIKYQRKLRMQSFNNYRRHFGLP--AYKSFEEMTG-DPKLA-----  
 463 AELKEVYGD---VNAVDFYVGGFFLEKSLPT-S----  
 464 PFGITMIASGAPYSLRGLLSNPVSSPTYWK----  
 465  
 466 **Gammarus sp ADB65786**  
 467 LLFQYYAQHFTHQFFR----TNYTKGPQFT-----KGN-  
 468 GGVDVSNIYGLTERQRRALRSNV-----DGKCLKFQING-----EHFPPYLKDVPGISMEY-----  
 469 -----PPLP-----  
 470 ITEDNKFALGHPPFALLPGLFVYSTIWMREHNRVCEVLKEQ-----HPH-----  
 471 WDDERLYHTAKLIITGEVIKITIEDYVQHLSQ-----  
 472 YKVDLKF KP-QVVHGTRFQFH-----NRINVEFDHLYH-WHPLIPEGIKVED-----  
 473 SYYSLMDMAFSTKSVFTHG-----LDAFVKALVTNRAGKLT-SRNHSP-----  
 474 VTVPVLKKMLENSRILRFQGVNQYRKKFNMR--PFRDFLDLTG-DEELA-----  
 475 RDMEEMYGD---INAVEYYVGLIAEKDSP--S----  
 476 LTPLTMVNVGGPWSVKGLIANPICSPHWWK----  
 477  
 478 **Caprella sp ADB65785**  
 479 LLFQYYAQHFTHQFFR----TNYTMCPQFT-----KGN-  
 480 GGVDVSNIYGLTEQHRRAIRMNS-----DGKCLKYQVIND-----EHYPPYLRDVQGIEMDY-----  
 481 -----PCHIP-----  
 482 ITEDNKFALGHPPFALLPGLFVVFSTIWMREHNRVCDVLKNQ-----HPD-----  
 483 WDDERLYQTAKLIITGEVIKITIEDYVQHLSQ-----  
 484 YKVDLKF KP-QVVHGTRFQFD-----NRINAEFNHLYH-WHPLIPDGIQVED-----  
 485 KYYSLMDMAFSTKSVFTHG-----LDKFIESMATS RAGKLS-HSNHPL-----  
 486 VTLPLVKKMMENGRKLR YQGINEYRKR FALK--PFKDFMDLTG-DEALA-----  
 487 KDLQELYGH---VDAVEFYVGLL TEKDSP--S----  
 488 LTPLTMVNVGGPWSVKGLIANPICSPHWWK----  
 489  
 490 **Nitzschia sp MMETSP0014\_2-20120614\_6887**  
 491 PQLNFWMLSFVNWFHD----DNFRTLPTDTG-----  
 492 AFTWSDRGLHMT HLYGHTEYRQAALRTMA----GDGKMKTS SRLG----  
 493 WDYYPPLLMDVQADFPD-----FDMWTSQRGSKHKSTSAGQTSEQADEN----  
 494 -----MPYYFAIGDPRFNLHLGHILWTSVGLYLHNTACVILQRE-----DPG-  
 495 ----LTDEDIFQRRARVIVFHIIQKIRLQDFVMD SISSTR-----  
 496 ---DHIRIPYDPKLLREEFAHHFAYSGGN-QPNFLEFNHLYQAWHALIPNGLVLNEDVD-----  
 497 --DGEKDILPIRKT LWAPKLM TTNFT----IGEMATSFASTPLTLYSPHNFPVF-----  
 498 LRGVTEAALKDERAQRMAPYNSYRELIGLD--PITSFEQFAVDDP-----  
 499 QKMAELYNN---DVDSVDFIAGILADSNPHLPG---  
 500 NFFGVQLV LVALFALQDLANNPLILD PVMS----  
 501  
 502 **Skeletonema marinoi MMETSP0319-20121206\_1511**  
 503 EADVALVANIMKRDTN--SFAPFNQLASAWIQFMT--HDWFQHDASSS--QGLK-----  
 504 -----MKNVVTHWWDASQMYGS-----SQEEVDAVRAE-  
 505 GGKHLHDVNDEIDYN-----  
 506 ASLPITGFRENWWAGLHILHTIFAREHNHIVDILAQS-----YPS-----  
 507 MTEDELFGTARNIIA VLLAKIHTVEWTP TLLDNAVSDMALNINWHGLQTVTSMYFKGKNIP  
 508 DEVKDIIDEMK-----VPSVFGSNYTTTEQTLFNTP-----FYMTEEFVSVYR-  
 509 MHTLLPDAMILEGGKT-----VSLQELAF TDARNLVSDPSKTTAT-----

510 LLQAFHAHTPAQALSCLKNYPKSLFNLQIGNGK-----  
511 SINLAEIDISRDRARGIPRYNDARRQLLLT--PYKSMDDLTSDE-----ELKLLKSVY-  
512 ---TDIEQVDFLVGCLVDKDRPDGF----AFGIVPYYIFVVMASRRLSDRFFQEGLTEENYS  
513

514 **Pseudo-nitzschia pungens MMETSP1061-20121228\_74475**

515 DNVQVIAQRLAREGFKPAGNQLNIAAAWIQAQV--  
516 HSWIQHLDGAPTSIEATAEAVGPVCPVKK--MNFETE-ERP-----GE----  
517 YNSFRTQWWDASFVYGQ-----  
518 NREQVHLGRLYKDGKLVNESNPDTLSFV-----  
519 EEGKSKIDVVGQDQSNVWVGTVLQVLFKEHNYCAEMIKKE-----NPQ-----  
520 LTDEEYGHCRNIALVAKIHTIDWTVLLKTEQLRVAMEINWKG-----  
521 ATKA VFGDKAPF-----HP--LRLINKPKADNKGVP-----FCLTEEFAAVYR-  
522 LHPLLPPGLVVEHG-----EGKEEFIEKLLTTKGRDKMREPG---  
523 MAKKIMFSAFHYSCHLSSNYPFIMRKFPTDTHKGVLDLQPPEDRVVDMAAIDLHRDRER  
524 GIQKYNEFRRQLKLR--PFKTWEALTGEENKSDN-----  
525 ELTDAKKLELIYGPAPEGIEKIDLLVGDLYERKIADGF----  
526 ALSETSFMIFLLMASRRIDSDPYLNEYYN EYYT  
527

528 **Thalassiosira rotula TR754|c0\_g1\_i1|m.3431**

529 MLFPTFAQHLIDSFIV-----TAIKENTSEG----  
530 VEFDWRTGSPHDIGLLPLYGKTIEQTTQLRLKS-ELKGSKGKLTQIIKG-----  
531 GEWSPYLFDAKGNKKP-----EFSSLP-DPEGLEFALGMAKQHGVDVKK-----  
532 -----N-KATVFALGGSRANLTPNIVAWNTLLLREHNRIASKIEE-----NPK----  
533 --WDDERVFQTARNVNLA VYLRVIEEYINHITGF-----  
534 ---GVDFTVEPGKWMWDAPWYKR-----NWISAEFAVLYR-WHAVIPNCMKWG-----  
535 EKTLPASYLYSNHLLDED-GMKGDLREAFINISDHRATSMQIHNTES-----  
536 WMKGRDARALQMSRACELRSFTEYCA YLGAK--VPKTFADITS-DVEVQ-----  
537 NELKALY GK---VENIEFWVGLIAKDHPTE-S---  
538 IMSAELTSFVANDAFNQAL THPLLSEHVWAAGPE  
539

540 **Skeletonema marinoi MMETSP0920-20130426\_33289**

541 LLFPTFAQHLIDSFIN-----TKIN-VETG-----EFEWDRDTSKHEIGIGPLYGDEVEQTSQLREKS-  
542 EKPGRRGRLKTQVLEG---DEEWAPFLYNEDGTKKE-----EFSAIH-  
543 DPDGMKITILGLVYSSDPTTKS-----  
544 SIEQSIFAFGGRRANLNPVAVWNTLLLREHNRLAGEIEKS-----EPG-----  
545 WDDERVFQTARNVLIVMYCKIVIEEYIKHIS-----  
546 GVNFKVDPGPWMWNAPWYKT-----NWMSTEFALYR-WHALIPNEAGLGP-----  
547 SKDAGVMESLFNNPVLLDDETGLGGNLRDIFVDISQTRITSFQLFNTEK-----  
548 WMVERESAANQGRANNVQSYAA YCEYLDIE--PPKTFEDISM-VPERQ-----  
549 QALKELYGT---PDRVEFYVGLIAADHPAGGK---  
550 IFSEAMTKFVANDAFNQALTNPLLSQNVWE----  
551

552 **Fragilariopsis kerguelensis MMETSP0907-20130614\_13332**

553 PNVQVVAQRLARESFTPAGDQLNIVAAGWIQAMV--  
554 HDWMKHEDGKKTSMVTPAVVGSQCPLHR--FNLFETK-ERP-----  
555 YNSERTNWWDA SFVYGQ-----  
556 NAEVQVQNSRAVGGKLVNEKNPDTLPSR-----DDG---  
557 TDLTGQDQSNVWVGSVLQTLFLYEHNYCAEQIAKE-----NPN-----

558 LTDHQIYGHCRNIIAALVAKIHTIDWTVELLKTPQLKIGMRTNWMG-----  
559 IIQAITGLKIPF-----LDRLRLRIKKKENNEGVP-----FCLTEEFAAVYR-  
560 LHPLLPPGLIIEGEGA----GDKDEDEDTFIDLRTLTTKGRDLMRKSG---  
561 MAKKVMKAVFTYPCGNMAPSNYPDVMRDFHPTDLLGNNL----  
562 DDRIDLAAIDLFRDRERGIQYFNNFRKLSMK--  
563 PFQTWEELTGDDKMTEEALAAFVAGTGNLTNAKKLELVYGAAPKIEHCDDLVDLYEK  
564 KIP-GF----AISETSFMIFLLMASRRLDADPYLNEYFDEEHYT  
565  
566 **Skeletonema grethea MMETSP0578-20130828\_1168**  
567 ILVAYSIXSFQYVLDFKPAASQLNVLAASWIQAMV--HDWIGHFDGDET--  
568 ETLDRGGESLCPFAKSPFSFKNTKTEKIDGVPF-----SPSERTNWWDASFVYGN-----  
569 -----NSEQIDRARTMQGGKMVTS-IPHALAED-----KDG---  
570 VYFAGDNKNSWVGVALLODLFIREHNYICDQIAAE-----AKEEGK--  
571 EMTDEELFGKARVVVAALVAKIHTVDWTVELLKTKLLAIGMKTNWDG-----  
572 LLKAVG-IPPG-----ILSQMGEKKGRVSDNEGTP-----FCLTEEFAAVYR-  
573 LHSLSPGLILGDG-----DAKDKFIGLEDLLGDEGRKQMRETKT--  
574 RPKEMMKSLHWPCGALMSSNYPNAFRDVAPTDDYGKDLK---  
575 SQNIDLAALDLFRDRERGILKFNEFRQLNLK--PYRTWLELTENEE-----  
576 DARKLELIYGPGQEGIERCDLLVGDMYERKVQPSF----  
577 ALSETSFIFLLMASRRLSADPFLNELYNEETYS  
578  
579 **Staurosira sp MMETSP1361-20130828\_23824**  
580 LLFPFFAQWFVDSFLR-----TKWKPLAEQD-----  
581 FKENESNHDIDLNQIYGTSEIQTDMRLSMK-----GGRLKSQIIDG-----EEYPVFLFDQKT-----  
582 A-----TLKPEFRGLYT-EENFKRVFGNASKE-----  
583 HKLHSFAVGLEHGNSTIGNTVMNTLFLREHNRVAGVISAA-----HPE-----  
584 WDDERVFQTTTRNVMIVLLIKIVLADYIYHIS-----  
585 GAAVFADPGGFAEDELWYRE-----NWMSVEFSLLYR-WHDLIPSSVTFDG-----  
586 ETRDAVDLQNNNRWLLKAG-----MDSVIQDASNQKAGVMGLGNTPDF-----  
587 LLSVTKMS-LHMARTCKLSSYVEYCKEYQGD--PPEDFMDLTG-DQDSA-----  
588 SKLERVYGS---IDKVEWVGLFAQK-RDV-----  
589 FSGLLMTLMVGNDAVTQAFTNPLLAKRVYN----  
590 **Skeletonema marinoi MMETSP1428-20130617\_31509**  
591 EADVALVANMMKRDTN--SFAPFNQLASAWIQFMT--HDWFQHDASS--QGLK-----  
592 -----MQNVVTHWWDASQMYGS-----SQEEVDAVRAE-  
593 GGKLHLDVNDEIDYN-----  
594 ASLPITGFRENWWAGLHILHTVFAREHNHIVDILAQS-----YPS-----  
595 MTEDELFGTARNIIAALLAKIHTVEWTP-----KNIPDEVKDIIDEMK-----  
596 -----VPSVFGSNYTTEQTLFNT-----FYMTEEFVSVYR-MHHLLPDEMILEGGK-----  
597 -LQELAFTDARNLVSDPSKTTAT-----LLQAFAPHTPAQALSLSKNYPKSLFNLQIGNGK-----  
598 --LINLAEIDISRDRARGIPRYNDARRQLLLT--PYKSMDDLTSKDE-----  
599 ELKLLKSVY---ADIEQVDFLVGCLVDKDRPDGF---AFGI--YYIFVVMASRRLSDRFFQ----  
600 ----  
601 **Homo sapiens NP000953**  
602 LMFAFFAQHFTHQFFK-----TSGKMGPGFT-----  
603 KALGHGVDLGHYGDNLERQYQLRLFK-----DGKLYQVLDG-----EMYPPSVVEEAP-  
604 VLMHY-----PRGI-----  
605 PPQSQMAVGQEVFGLLPGLMLYATLWLREHNRVCDLLKAE-----HPT-----

606 WGDEQLFQTTRLILIGETIKIVIEEYVQQLSG-----  
 607 YFLQLKFDL-ELLFGVQFQYR-----NRIAMEFNHLYH-WHPLMPDSFKVGS-----  
 608 QEYSYEQLFNLSMLVDYG-----VEALVDAFSRQIAGRIGGGRNMDH-----  
 609 HILHVAVDVIRESRMRLQPFNEYRKRFGMK--PYTSFQELVG-EKEMA-----  
 610 AELEELYGD---IDALEFYPLGKLLLEKCHPN-S---IFGESMIEIGAPFSLKGLLGNPICSPEYWK--  
 611 --  
 612  
 613 **Ovis aries NP001009476**  
 614 LMFAFFAQHFTHQFFK----TSGKMGPGFT-----  
 615 KALGHGVDLGHYGDNLERQYQLRLFK-----DGKLYQMLNG-----EVYPPSVEEAP-  
 616 VLMHY-----PRGI-----  
 617 PPQSQMAVGQEVFGLLPGLMLYATIWLREHNRVCDLLKAE-----HPT-----  
 618 WGDEQLFQTARLILIGETIKIVIEEYVQQLSG-----  
 619 YFLQLKFDL-ELLFGAQFQYR-----NRIAMEFNQLYH-WHPLMPDSFRVGP-----  
 620 QDYSYEQLFNLSMLVDYG-----VEALVDAFSRQPAGRIGGGRNIDH-----  
 621 HILHVAVDVIKESRVLRLQPFNEYRKRFGMK--PYTSFQELTG-EKEMA-----  
 622 AELEELYGD---IDALEFYPLGKLLLEKCHPN-S---  
 623 IFGESMIEMGAPFSLKGLLGNPICSPEYWK---  
 624  
 625 **Homo sapiens NP000954**  
 626 MMFAFFAQHFTHQFFK----TDHKRGPAFT-----  
 627 NGLGHGVDLNHIYGETLARQRKRLFK-----DGKMKYQIIDG-----EMYPTVKDTQ-  
 628 AEMHY-----PPQV-----  
 629 PEHLRFAVGQEVFGLVPLMMYATIWLREHNRVCDVVKQE-----HPE-----  
 630 WGDEQLFQTSRLILIGETIKIVIEDYVQHLSG-----  
 631 YHFKLKFDP-ELLFNKQFQYQ-----NRIAAEFNTLYH-WHPLLPDTFQIHD-----  
 632 QKYNQYQFIYNNLSILLEHG-----ITQFVESFTRQIAGRVAGGRNVPP-----  
 633 AVQKVSQASIDQSRQMKYQSFNEYRKRFMLK--PYESFEELTG-EKEMS-----  
 634 AELEALYGD---IDAVELYPALLVEKPRPD-A---  
 635 IFGETMVEVGAPFSLKGLMGNVICSPAYWK---  
 636  
 637 **Coccyzus truncatus AFN20596**  
 638 VLIAYYAQWVTHQFFN----TDESPTGHS-----  
 639 VKQPVGVNMSMLYGSKQEVKSVRAYK-----GGLLKSTIKNG-----QEFPEIMPCQEGSRIP--  
 640 -----  
 641 GKEMFNMPILIANMIPGFAAIHVLFFRRHQYICRELAKW-----AEAQGK--  
 642 NIDDEELFQKAKLIVTVNMLRITMHDYVSRALQSSHAKMR-----  
 643 -----FDQKVKQSRIWKMFDPYFPPS----NAIQFEFNIFYR-WHQFYPTTKIMKR-----  
 644 IDDLKFPKSKQQLDEKWNVAVRWIAD---PDGMERVLFSASSQRAGKLSLLNTNQW-----  
 645 -----IVEHVVKPGLARCREHQLASYNDYREKVGFP--RLTTFEQVTS-NPALL-----  
 646 EKLKRVYRN---VDQIEYYPGVFAEDKHFG-----  
 647 NVHGPLTFGSSMTFTGIFSSRLFETALDE---  
 648  
 649 **Ciona intestinalis XP002127674**  
 650 VLFPFFAQHFTHMFFK----TDPKMGMPYQ-----WGD-  
 651 QLVDSLQIYGHGKQRQHELRSV-----NGKLVSLVDG-----HEFPP-LSNQTTANMSN-----  
 652 -----INLL-----  
 653 PQEYQFVFGHQGFSMLPTFLIWSTIWLREHNRICDLIKEE-----NPA-----



654 WDDERIFQTARLVLTGETIKVVIEDYVQHLSG-----  
655 FHYKLLYDP-ELVQGGSHSFH-----NQIHVEFQLLYH-WHALMPDQIEFNG-----  
656 KSYTMKRLLFNPEPVVKGK-----LKRTIEDLSNQWAGQVAGGKTQGA-----  
657 ATLVHAGLAIKNGRDLRMQSFNAYKEKFEMK--KYTTFQELTG-EEEMA-----  
658 AELQKLYGD---IDAVEYYIGIMLEKRRSP-Q---  
659 LFGETLTEMGSPYSLKGLYSNPINHKDWWK----  
660  
661 **Ciona intestinalis XP002123273**  
662 VFFAFFAQHFTHQFFK-----TNTIKGMPFQ-----WGE-HSVDLSHVYGHYTIQRQHELRSHI--  
663 ---DGKLVFETNG-----EVFPP-LTESANVTMSG-----EKLM-----  
664 -----RGR-KFAIGHPGFGAFPSFFVIATLWLREHNRVCDILKDL-----  
665 HPD-----WDDERLFQTARLILTGETLKIIVEDYVQHVSG-----  
666 -----FHFQLSYDP-EILHKSTFSYN-----NQIHAEFHILYH-WHMLMPDFIELGE-----  
667 --HVYPLKELLFNVDPVVEIG-----METVLKQLSNQFAGKVVGGRNQGP-----  
668 ELVAVVELALKQTRQMRMCSFNKYRERFGMK--PYTSFEELTG-ETEVA-----  
669 ALLRNLYYD---IDALELFVGYFVEHRRNR-Q---  
670 VLGATMLEMGAPYSLKGVFGNPIGSPAWWK----  
671  
672 **Oncorhynchus mykiss CAC10360.1**  
673 LMFAFFAQHFTHQFFK-----TRNSMGLGFT-----  
674 RALGHGVDAGNVYGDNLVRQLNLRLLK-----DGKMKYQVVKG-----EVYPPTVAEAA-  
675 VNMRY-----PQET-----  
676 PVGQRMAIGQEVFGLLPGLTMYATLWLREHNRVCDILKAE-----HPT-----  
677 WGDEQLFQTARLIVIGETIRIVIEEYVQHLSG-----  
678 YLLDLKFDP-VLLFKSTFQYR-----NRIAVEFKQLYH-WHPLMPDSFHIDG-----  
679 DEVPYSQFIFNTSIVTHYG-----VEKLVDAFSRQCAGQIGGGRNHHP-----  
680 VVTNVAEGVIEESRTLRLQPFNEYRKRFLNK--PYTSFSDFTG-EEEMA-----  
681 RELEELYGD---IDALEFYPAIMLEKTRPN-A---  
682 IFGESMVEMGAPFSLKGLLGNPICSPEYWK----  
683  
684 **Fistulifera solaris GAX23950.1**  
685 LPPVKDVAAILRRPMNPTSVAPFNQIAVAWIQMMT--HDWFQHDP AHPDQK-----  
686 -----MNRVTHWWDASQLYGS-----  
687 TLAQQTAVRVPNTGKVRDLQHQELNYTT-----  
688 TGIPITGFADNWWAGLHMMHTLFRVREHNWLVDQFERQ-----YPG-----  
689 VYTANDKFQLARLCLLSALLAKIHTVEWTPTLNDNPVAALGLHTNWRG---  
690 VDAILEYGTRFELQLAYRIVGGD-----QSVPHAGNGTTRETLYNTT-----  
691 FAMTEEFVAVYR-MHPLLPEMEIEGKTFS-----LNDLSFVDARTLTKS-VKTTQT-----  
692 LLQAFGMTPANTLSLQNYPRQLYGLEKPGMS-----  
693 QPVNLAEIDLQRDRERNLPRYNDMRRQLLLK--PYKRLEDLTDDDET-----  
694 ELNLLKSVY---QDMDQVDLMVGCLVDKDRPYGF---  
695 AFGIVPFHVFLVMASRRILNDRFFMEDFNAKVYT  
696  
697 **Cyanothece sp ACB53655.1**  
698 PNPRVVSRTLMTREDFKPATILNLLAAAWIQFEN--  
699 HDWFHSHGDNKPEDKLEIPLEANDPWPEEYRPLEVGKTLPTDSRPEGAKPP--  
700 TFINTVTHWWDGSQLYGS-----NPETVDQLRSHEDGKLIIGENGLLPVDP---  
701 -----ETGVDITGFNDNWWIGLGMHLTLFTREHNLICDHLKQE-----YSQ---

702 ---WSDDDLFDHARLINAALMAKIHTVDWTPAILPLPATDIALNVNWNWNGFLG-----  
 703 EDIKQVLGTVG-----EGEIADLLTGIIGS-DKNHHTAP-----YYLTEEFVSVYR-  
 704 MHPLIPDELEFRSLEGD-----KFLQEVNFFEMSGKRTRALLESISL----  
 705 PDLFYSFGITHPGAITLHNYPRFLQQLVRDNGE-----  
 706 VFDLAAVDILRDRERGVPRYNRFREIMGRG--RVKCFEEISSNKQ-----  
 707 WVEEMRRVYN---DNIDQVDLMVGLFAEDT-PEGF----  
 708 GFSDTAFRVFILMASRRLKSDRFFTTDYRAEIYT  
 709  
 710 **Fistulifera solaris GAX18717.1**  
 711 LPPVKDVAAILRRPENPSTVAPFNQIAVAWIQMMT--HDWFQHDPTNPDSK-----  
 712 -----MNRVTHWWDASQLYGS-----  
 713 TLTQQRAVRVPNTGKLRLDKHQELNYTS-----  
 714 TGIPITGFADNWWAGLHMMHTLFVREHNWLADQFELQ-----YPG-----  
 715 VYTANDKFQLTRLCLSALLAKIHTIEWTPTLDDNPVAALGLHTNWRG---  
 716 VDAILEYGTQFELQLAYRIVGGD-----QSVPHAGNGTTRETMYNTT-----  
 717 FAMTEEFVAVYR-MHPLLDDMEIEGITLT-----LNDLSFVDARKLTKS-VKTTQT-----  
 718 LLQAFGTTPANTLSLQNYPRQLYGLEKPGMS-----  
 719 QPINLAEIDLQRDRERNLPRYNMRRQQLLK--PYKRLEDLTDDDET-----  
 720 ELNLLKSVY---QDIDQVDLMVGLVDKDRPYGF----  
 721 AFGIVPFHVFLVMASRRILNDRFFMEDFNAKVYT  
 722  
 723 **Alcanivorax nanhaiticus WP\_035233415.1**  
 724 PNPREVSNLIMSRGGDFKPATTLNFIATSWIQFMV--  
 725 HDWFDHGPRTDANPIEFPLPAGDVLGGGTMSVQRTRPDPDVSDEGIITY--ENIN--  
 726 THWWDGSQLYGS-----SKEKNDEVRSFVDGKLVGDGRLPTEF-----  
 727 -----FSGKPVTGFNENWWVGLSMLHHIFTQEHNAIADMLVAN-----YPG-----  
 728 QSDQWYFDKARLINSALMAKIHTVEWTPAILANPVLERAMYANWWGLGGDRDKRDYQ  
 729 DDLDNLNNNLGQIGLLDLVGIDNGLGDSPTGSLEHALAGLVGSRTPNNYNVP-----  
 730 YTLTEEFVSVYR-MHPLLDRDEIKVYDIGSN-----VVDEEIALEDTRNGDAEDLLGDIGQ---  
 731 DRLWYSFGITHPGALTLNNYPDFLRNLSMPLIG-----  
 732 DIDMAAIDILRDRERGVPRYNEFRRQIGLK--PLTSFEQLTSDPQ-----  
 733 LLADLKALYN---NDIELVDTLVGQLGEETRPEGF----  
 734 GFGETSFQIFILNASRRLMTDRFFTTDYTDEVYT  
 735  
 736 **Hordeum vulgare subsp. Vulgare BAJ90503.1**  
 737 PDPFVVATKLLARREYKDTGKQFNILAAAWIQFMV--  
 738 HDWMDHMEDTKQIEITAPKEVANECPLKS--FKFYATKEQPTNSDGIKT---  
 739 GYHNIRTAWWDGSAVYGN-----NEKQEKKIRTYADGKLVIGDD-GLLLHE-  
 740 -----ENG---VPLSGDVRNGWVGISILQALFVKEHNAVCDAIKEE-----  
 741 HPN-----LSDEELYRYAKLVTSAVIAKIHTIDWTVELLKTKTLRAGMRANWYG-----  
 742 LLGKKIKDTFGHIG-----GTALGGLVGLKKPINHGVP-----YSLTEEFVSVYR-  
 743 MHPLIPSTLKLDRDPTGQPA--ADNSPPYLEDIDIGELVGLKGEDQLSKIG----  
 744 FEKQTLSMGYQACGALELWNYPSSFRDLIPQNLDTGTRNS----  
 745 DRIDLAALEVYRDRERSVPRYNEFRRLFLI--PIKCWEDLTSDND-----  
 746 AIEAIRAIYG---DDVEKLDLLVGLLAEKKIK-GF----  
 747 ASETAFNIFILMASRRLEADRFLTSNFNEKTYT  
 748  
 749

750 **Triticum aestivum CDM84254.1**  
751 PDPFVVATKLLARREYKDTGKQFNILAAAWIQFMV--  
752 HDWMDHMEDTKQIEITAPKEVANECPLKS--FKFYATKEQPTNSDGIKT---  
753 GYNNVRTAWWDGSAVYGN-----NEKQAEKTRTYVDGKLVIGDD-  
754 GLLLHE-----ENG---VPLSGDVRNGWVGVSILQALFVKEHNAVCDAIKED-  
755 -----HPN-----LSDEELYRYAKLVTSAVIAKIHTIDWTVELLKTKTMRAAMRANWYG-----  
756 ----LLGKKFKDTFGHIG-----GTALGGLVGLKKPINHGVP-----YSLTEEFTSVYR-  
757 MHSLIPTTLKLRDPTGQPA--ANNSPPYLEDIDIGELVGLKGEDQLSKIG----  
758 FEKQTLSMGYQACGALELWNYPSPFRDLIPQNLDTGTRNS----  
759 DRIDLAALEVYRDRERSVPRYNEFRRLFLI--PIKSWEDLTSDKD-----  
760 AIESIRAIYG--DDVEKLDLLVGLMAEKKIK-GF----  
761 ASETAFNIFILMASRRLEADRFITSNFNEKTYT  
762  
763 **Rhizophagus clarus GBC07128.1**  
764 LELEHYITALTQLPLN----  
765 TPEEKLLSILERLLVTQLWSDISKPPAMIAGDIYRSSDGSYGNRLIQSLGKANSRYSLSRSI  
766 QYPIKLSVLPKSEDIFDKIMVQGGDFVEHPSGISSMLFYLAIIITHDLFHTSFADPNINLTSSYL  
767 DLTPLYGSNDQEKSIRTLKG-----  
768 GLLKPDTFADSRILLQPPGVSAVLVILFSRNHNFIQAQTLLKKNELGRFSVTNPNDPEQLKKQDE  
769 DLFQATARLINCIFYINVILHNYLRILGLDR-----  
770 TNSKWFVDPTVPYNKRGQLEPLPSGIGNIVSLEFNYYR-WHAATSKDDSKFVEDEFKTIFG-  
771 ----  
772 DDWENITIDEFKEKMGVWGRSIPKDPKWKFNHIERGSDNRFKDTDIAKEIINGTKKVSGA  
773 FGANRIPKVFRPIELLGIESARVLGLSSLNDFRRSLNLK--PYESFMEMNP-DPLIA-----  
774 -KKLEELYGS----  
775 IENVELYPGLMTEKTKPDMLGSAIALPFTISRILSDAVNLVRNDRYYTNDFPSRNL  
776  
777 **Emiliana huxleyi XP\_005780718.1**  
778 PFQALHNLPSADEVVR-----LLYKRDAFK-----  
779 KAPYGVNSLATWFANVAIHDFRTAT---GTDGGTHPERGSDK--  
780 EWVNLHSSYLDLQPLYGYS-----KTTADATREWS-----  
781 -----GGKLKAFAEDRMRRIPESRVIVELLRREHNYVAEQLAQR-----YPAQ----  
782 FATDEELYQQARLIMGGVYINIILRAYGCQMFG-----  
783 ---EIAPDGSGFCEL RQGYGGAGVG---NMCTFNFNLIYR-FHTSIPVEWSATD-----  
784 PPPIDTDEQMR-----TLLNGILNWESGGFGPNNVPDSILG-----  
785 ERARVSQRAIEAARLMGAPTLNTRRRRFTSG---YSSFEDMTGGDQATA-----  
786 DTLRQLYPG---GIEDVELLVGCQVEKCMSSGW----  
787 ALPSTIGQAIVADAFASIRQDRFYTQDWGASSYT  
788  
789 **Rhodococcus gordoniae WP\_064063209.1**  
790 VWFAFFAQWFTDSFLR-----TNSKD-----  
791 PRKNDSNHEIDLQCQYGVNQAKTMLRAGY-----GGRLDSQVIDK-----  
792 KEYPPFLFAARTPGEEL-----RFVVPKFEGLDREYLLDVTVLRRLCPDE-----  
793 -----RKKSVFVAVGLEHGNSTIGNTVLNVFLREHNRIAGILEGA-----YPEWD---  
794 ---DDRLFETTRNIMIVILLKIVIEEYIKHIG-----  
795 PFDFPIEFVP-FMADNAPWNRT-----NWCAIEFNLLYR-WHSLIPDTVVFDS-----  
796 QRVSTRILVDNNPLVLDRG-----IESIIDQCSRQKASRIGLGNTPAFLIDRHPMCPD-----  
797 RESVEERT-VGLMRQARLRSFNDRYEAFLG--RLTSFTELTG-DVEVQ-----

798 QKLARLYGD----VDAVEWYVGIFAED-YPRHR----

799 MMGELLTTMVAHDAFTQAFTNPLLARHVYHEDTF

800

801 **Herbidospora mongoliensis WP\_066371138.1**

802 VMFMFFAQWFTDSFLR-----TSRDD-----FRRNTSTQEIDLCQIYGLTEEKTHLLRAHR--

803 ----DGRLKSQLIDG----EYPEFLFRPRSSGEPP-----

804 VFKPEFEGLDHSEFIVSRLLLEDAPEK-----

805 QKDTFFAVGLEHGNSTIGNTIMNVVFLREHNRIAGLLKQA-----

806 HPEWAERPEGADARLFETTRNIMIVLLLKL VVEEYIRHIS-----

807 -----PYDFPLETVP-FIADGKRWNRS-----NWISIEFNLLYR-WHSLVPSTIGSGP-----

808 ----DRLDSTDFRNNNPLVLARG-----IESLVSQCSGERAGRIGLMNTPGFLVDRDPAHPE-----

809 ---RPSVQERT-IALSRKARLASYN DYRENFGLG--RLKDFGRLTQ-DAELR-----

810 ERLEKLYDD---IDKLEWYVGIFAED-YSRDE----

811 MMGRLMTTMVAYDAFTQALTNPLLARDVYNEATF

812

813 **Eutrema halophilum BAJ34623.1**

814 ---MVVATKLLTRRK MIDTGKQFN MIAASWIQFMI--

815 HDWVDHLEDTDQIELSAPKEAAKGCPLSS--FRFFKTKEVPTGFFEIKT---

816 GSLNTRTPWWDSSVIYGS-----NSKTLERVRTYKDGKLGKISEETGLLLHD---

817 -----DDG---LAISGDIRNSWVGVSALQALFIKEHNAVCDLLKKE-----YED--

818 ---LEDEDLYRHARLVTS AVIAKIHTIDWTVELLKTDTLLAGMRANWYG-----

819 LLGKKFKDTRFGHVG-----SSIFGGVVGMMKKPQNHGVP-----YSLTEEFTSVYR-

820 MHSLLPDQLHMRDIDVTPG--PNKSLPLTQEVSM EKLIGREGEETMSQIG----

821 FTKLMVSMGHQACGALELMNYPAWFRDLVPQDPNGHDRP----

822 DHIDLA ALEIYRDRERNVARYNDFRRAMFMI--PIKTWEDLTDDKE-----

823 AIELDDVYG---GDVDEL DLLVGLMAEKKIK-GF----

824 ASETAFNIFLLMATRRLEADRFFTSDFNEMTYT

825

826 **Pisum sativum CAH05011.1**

827 PDPMVVVTKLLERKTYKDTGTQFN VIAASWIQFMI--

828 HDWIDHMEDTKQVELSAPSEVASQCPLKS--FKFFKTKEIPTGFYDIKT---

829 GHANVRTPWWDGSSVYGS-----NEQVLNKVRTFKDGKLGKISKE-

830 GHLLHN-----EDG---TAISGDIRNSWAGVTTLQTLFVQEHN AVCDALKKE-

831 -----NSD-----LEDEDLYRHARLVTS AVIAKIHTIDWTVELLKTDTLLAGMRANWYG-----

832 ---LLGKQFKDRFGHVG-----NSILSGFVGMKRSENHGVP-----YSLTEEFATVYR-

833 MHPLLPDSLHLRDISASPG--PNKSPPLIKEIPMNDLIGLQGEKTLLEIG----

834 NAKKLVSMGHQACGALELWNYP SWLRNLVPHNIDGTERS----

835 DHVDLA ALEVYRDRERNVARYNQFRRGLLLI--PISKWEDLTDDDEE-----

836 AIKVLEEVYG---DDVEELDVLVGLMAEKKIK-GF----

837 ASETAFVIFLLMASRRLEADRFFTSNFNEETYT

838 **Original sequences, ungapped, utilized in the phylogenetic analysis**

839

840 **Chaetoceros neogracile MMETSP0751-20121128\_3624**

841 MVFPNFAQFLTLDGFAKSIPGTNFLRNNATHEADLCQIYGRNKDQTDCLRLMSSSIGE  
842 KGRLKSCMINGEWPMPYFLESGEVDPQFERLDPPKFSFDHVIEQLSRIDPNGRLGLVQKIK  
843 KNIFAVGSDRGNTTPGVAAFASLFLREHNRLAAEVENRNPAWDDGQIFQTARNINIVYIRII  
844 MEDYLNQLSHAPDFKLDPGPWTWDAKWNKKFRVAVEFSTVYRWHSIIPNAIQIGEGDPL  
845 PIMQAMFNNELLIDRTLLKSFEDSSSQRATSFTPFNTADIMLPREYNTILQARQAGIRYYVD  
846 YLKQFGFPVDLPKNYSDITSDEKVQKMLEEMYGKGNVDKVEFYIGAICATHERNAPFSLF  
847 MNLQVAHDAIKAFYMNPLLQRSSWK

848

849 **Asterionellopsis glacialis MMETSP0707-20130614\_6459**

850 MILPTFANHLTGGFIKSTRGPDGSYQYGRTHSNHNIDLLQLYGRTEQTLALRLRDN  
851 TTFGKKGRLKSQILNGGEEWPPFLYKDGRIQPEVLDPIAHGMSHLVDIMEGDRSKFFAM  
852 GSNQQNMLPQNIAMTTLFLREHNRVAGELERRYSDWDDDRIFETARNIVIVIYLYKIVIEEYI  
853 NHISPLPDIVKFLVDPGPWMWNAEWNKPNWISAEFAILYRWHALMPNKVMHAGIVFDLSS  
854 TLFQHDLLGEDRSLKKTFFVDMASQRSASCECLNTAGPLVEREVESLRYSRALRFRPYVEY  
855 VEYWGLKKPRRFEDITKNAEVASMLRDLYGTVDKVEFFVGLIASDHSKNGIFGSSMNIGVG  
856 LDAFSQALTNPLLSEHVWK

857

858 **Aulacoseira subarctica MMETSP1064-20121228\_17645**

859 MLFPVFAQMLIDSFISTVYTNNTTKLTFDWKRTNSPFEINLLPLYGRFEYQTDALR  
860 LKSEKSRGRLKSQIINGEEYAEFLYNDLGEIKDEFQVLGPPQAFNQILSKVDKTEEEKRRIKS  
861 KIFAFGGNRTNTPQMAALNTLFLREHNRLAGQLEKHNEWDDDR VFQTARNINLVIYLYKI  
862 IIEEYINHITSSGARFKVQPKWVWNADWNKPNWIAVEFAVLYRWHALTPNSYLWEGKRV  
863 KISDDL FNNALLETSGGLRQAIAEISKNPATIMAPFN TALELLS QEQA AFAQTRQANVRPF  
864 ADYRAYLGLPLVKTFKDITQDKEVQKLEELYKTPDRVEFWAGLVAEDKDPKAI FGPTLS  
865 TLVALDAFSQAL THPLLSEQVFN

866

867 **Aulacoseira subarctica MMETSP1064-20121228\_57453**

868 MLFPVFAQYLIDSFILTKRIKTEGGTVSTIDWKRS DSPNDIVLLPLYGFKNATDALRL  
869 KSEEAQKRGKLSQLIDGEEYAPFLYDESGMVKEEFKALGEPESLGEILKAMMADSNTVK  
870 KYKSKIFAFGLVRVNITPQLAAMNTLFLREHNRLAGVLEENNP EWDDERVFQTARNINLVI  
871 YLKIVIEEYINHISG VQFKAKPEKWIWHASWNKPNWISVEFAVLYRWHTLVPNSDEWNGI  
872 RYDFQNEIFNNEILLDAGGLRHSFASISANRAPSICPFNTGGFLLPREASALQ QSRV NKL RPF  
873 GEYREYLG YKKTKEFS DISSDPQVQETLRKLYKTPDRVEFYAGLIAEDHVAKGILAPIMTDL  
874 VAKDAFTQAL THPLLSENVFN

875

876 **Chaetoceros affine MMETSP0090-20130426\_9955**

877 MLFPTFAQHLIDSFIVTAVKSDGGSGTEFEWKKTDS PHDIGLLPLYGRTFDQTKQLR  
878 VQNPPRGKYGQLKSQIIHGEEYAPYLYDADGKVKKEFDLLETPQGLERSLSMLS PEDAKAK  
879 KSNIFAFGGARTNLVPNITAWNTLLLREHNRIAQTIEKEEPTWDDERVFQTARNVLLVIYLYK  
880 LVVEEYINHITGYGIDFTVDPGKWMWNAPWYKRNWISAEFAVLYRWHGVIPSCMKWGD  
881 KTLSTHESL FNNAVLTEDMKGSLRDTFINISNH RATQMNLFNTESMMVLRDMAALKQCRA  
882 CKIKPYADYVVYLGTKERPTKFS DISKDKEVQEAL EKVKVENVEFWTGLLASDN PPEGI  
883 MSPEMTTFVANDAFNQALCHPLLSENVWS

884 **Chaetoceros curvisetus MMETSP0717-20131115\_51459**  
885 MLFPTFAQHLIDSFIVTAIKENSSEGVVFNWRKTGSPHDIGLLPLYGKTIEQTTQLRL  
886 KSEVKGSKGRMKTQIIKGGEWSPYLFDSKGNKKAEFSSLPDPEGLEFALMEAKKFGVDAE  
887 KNKASVFALGGSRLNTPNIVAWNTLLLREHNSIAAKIEAENPEWDDERVFQTARNVNLA  
888 VYLRLVIEEYINHITAFGVDFTEVEPGKWMWDAPWYKRNWISAEFAVLRYRWHAVIPNCMK  
889 WGEKTLPTAAYLYSNHLLDDTGLKGDLEAFINISNHRATSMEIHNSEKWMTGRDSRAL  
890 QMSRECELSFTEYCAYLKGPVPKTFADITSDVEVQNELKALYGKVENVEFWVGLIAKDH  
891 PTEAIMSAELTTFVANDAFNQALHPLLESHVWP

892  
893 **Chaetoceros debilis MMETSP0149-20130528\_3320**  
894 MLFPTFAQHLIDSFIDTVYHYDDDGNVVFWDWKRTETPHDIGLLTLYGKTIPETKQLR  
895 KQSETSGEKGKLSQLVNGEEWAPFLYDSNGKVKEEFNELPVPQGIDEKMYAARPQVQA  
896 KLKESIFAFFGGSRTNLTNPISAWNTLLLREHNRIAGLIEENPTWDDERVFQTARNCTLVIY  
897 LRLVIEEYINHITAYGVDFEIEPEKWMWDAPWYKRNWISAEFAVLRYRWHAVIPSLMKWGK  
898 NTHTTMDYLFSNNLLSDDGMKGNLRDCFHNICDHRATNMQLHNSEGGFMVGRDKSALE  
899 MSRSCKLRSFSEYCGYLGTPAPESFADITQDKDLQKELKD VYGEVKNVEFWTGLIAKDHSC  
900 EAIMSAELTKFVANDAFNQALHPLLESHVFN

901  
902 **Chaetoceros debilis MMETSP0150-20130528\_3844**  
903 MLFPTFAQHLIDSFIDTVYHYENDGNVVFDRKLTGTPHDIGLLTLYGKTIPETKQLRK  
904 QSDTSGEKEKICPNLLKEKSXAPFLYDSNGKVKEEFNKLVPVQGDGKMYAARPQVRACL  
905 KESIFAFFGGSRTNLTNPISAWNTLLLREHNRIAGLIEEDNPTWDDERVFQTARNCTLVIYLR  
906 LVIEEYINHITTYGVDFKIEPEKWMWDAPWYKRNWISAEFAVLRYRWHAVIPSLMKWGKN  
907 THTTMEYLFSNNLLSDDGMKGNLRDCFHNICDHRATNMQLHNSEGGFMVGRDKSALEM  
908 SRSCELRSFSEYCGYLGSPAPESFADITQDKDLQKELKD VYGEVKNVEFWTGLIAKDHSC  
909 AIMS AELTKFVANDAFNXGFDSSSPFR

910  
911 **Odontella MMETSP0015\_2-20120614\_17751**  
912 LLFPTVAQHLIDSFINTKYTKTINGTFFDWARDTSPHEIGLSPLYGCNPKQTSQLREL  
913 NEKIGCKGRLKTQILGDGGEEWAPFLYGDGSKKAEFNELEPVALDHILGFNSENAEMMR  
914 KSIFAFFGGSRLNTPNIVAWNTLLLREHNRVASKIEASEPSWDDERVFQTARNVVLVIYLKI  
915 VIEDYVAHISGVNFKVQPGEW MWN AKWYKRNWMSVEFAVLRYRWHALIPNTTFWGSKTA  
916 STKDALYNN TLLL NKEQGCAGNLRNIMVQISEQRITSFQLNNTEDWL VDRDLNALRQSRE  
917 CNLASYADYCEYLGMDRPKTFTDISLYPEVQEKLRSLYKTADKVEFYVGLIAADHSPGGK  
918 LFSEAMTRFVANDAFNQALANPLLESEN VWK

919  
920 **Cyclotella meneghiniana MMETSP1057-20121228\_4220**  
921 LLFPTFAQHLIDSFINTRIDHEATEKNGGRPVFDWARDTSKHEIGLSPLYGDTEEQLN  
922 QLRLLSNVNGFKGLMKTQIINEEEWAPFLYEVDGSKKKEFS AIWDPSGASYVLGMRRDVG  
923 ERQKRTLFAFGGARANLNP NIVAWNTLLLREHNRIAGEIEKSEPSWDDERVFQTARNVLLV  
924 IYLKLVIEEYIAHIAGVNFKVDPGEW MWNAPWAKTNWMSTEFALRYRWHAVIPNTSSWG  
925 KAKNLKVLDTL FNNDLLLD TKEGLSGNLRDAFVSISEERVTAHQLFNTEEWMVDRELA AI  
926 KQGRANKVAS YADYAEYVDLPRPKTFADISLYPEVQKALEEVYGTVD RVEFYVGLIAVD  
927 MGAGGKIFSPMTKFVANDAFNQALTNPLLSMN VWN

928  
929 **Cyclotella meneghiniana MMETSP1057-20121228\_12622**  
930 LLFPTFAQHLIGSFINTKIDHEATEKNGGQVIFDWAKTYSRHDIGLSPLYGDTTEQTD  
931 QLRLMSNV TGFKGRMKTQLINDEEWAPFLYRVDGTTKPEFN AIWD PAGASHVLKMRGEE

932 GFKQKRTLFAFGGARANLNPNIWA WNTLLLREHNRLAGEIEKSEPSWDDERVFQTARNVNI  
933 VIYLKLVIEEYIAHISGADFKVDPGEWMWNADWNKANWMSVEFAILYRWHAIIPNTINWG  
934 TSNMKVSDILFNNDLLVKETEGLDANLRDVFVQMSEQRATAHQLFNTEEWLLDRELA AVT  
935 QGRANKVASYADYVEYLNLPKPTFADISLYPEVQNALKEVYGTVARVELYVGLIAADM  
936 GAGGKIFSLMTK FVANDAFNQALTNPLLSQNVWK  
937

938 **Pseudo-nitzschia arenisensis MMETSP0329-20121206\_15499**

939 LLFPTVAQHLIDSFINTHVDRKATEAKGSPVFNWAKTDS PHEIGLSPLYGDSKEQTD  
940 QLRERSEEVGRKGRLKSQMIEGEEWSPFLYDSKGNKKTEFSKIPDPSGMSHILKHVNAATA  
941 KKASIFAFGGARANLNPNIWA WNVLLLREHNRLASMIEESEPTWDDERVFQTARNVSIVIY  
942 LKIVIEEYIKHISGANFRVAPGKWLWNAQWNKTNWMSVEFAILYRWHAIIPNSSSWGPSKD  
943 VEVRESLFNNTLLLDKTKGMGAKLADIFVQISNERTTSFELNNTTEKWLVDREMAAIKQGR  
944 NNVAPYADYCEYLG YERP KTFADINRDPKVQEQLKELYGTPDKVEFYVGLIAGEHPSGGKI  
945 FSKMTSFVANDAFNQALGNPLLSQNVWE  
946

947 **Thalassionema frauenfeldii MMETSP0786-20121207\_3776**

948 LLFPTFAQHLIDSFINTRIKADTDKNKPPEFEWTRTDSKHEIGISPLYGDEPAQTKQLR  
949 ELSETSGRKGRLKTQMIEGEEWAPFLYNGNKKPEFSDIPEPDGVRMIEKHGFGDRSTIFAF  
950 GGRRANLNPNIWA WNTLLLREHNRLAAEIEKSEPEWDDERVFQTARNVLTVIYSKIVVEEY  
951 VGHISGVPFEVQPGPMMWNAEWNKTNWMSVEFAILYRWHALIPDTRWGPVKVDIGIMKQ  
952 LFNNTLLLSKENGMGANLKDCFTISRNRVTSFELFNTEGSYMATREMQAIRQCRAANVAP  
953 FADYCEYLGDPKPTFEDISRKPEVQKVLKELYGTPDRVEFYVGLIAQDHSAGPKIFGDVM  
954 TKFVANDAFNQALANPLLSQNVWE  
955

956 **Skeletonema marinoi MMETSP0320-20121206\_19182**

957 LLFPTFAQHLIDSFINTKLNTETGQFEWDQTESKHEISLGPLYGDDVGGQTNQLREKSE  
958 VTGRRGRLKTQILDGGEEWAHFLYDETGTCKKEEFNLIRDPDGMKHKALYNSDPAKSSI  
959 MQTIFAFGGRRVNLNPNMVA WNTLLLREHNRLAGEIERSEPSWDDERVFQTARNVLIVIYL  
960 KLVIQEYIGHISGVKFKLDPGEWMWNAPWYKTNWMSTEF SILYRWHALIPNQNGLGPSKD  
961 LGVLKSLFNPLLLDDEEKGLGGNLRDVFVDICKARITSFQLFNTEKWMVGREAAATISQGRA  
962 NNVQPYAKYCEYLRIKPPKTFKDISLVPEVQQALEELYGTPDRVEFYVGLIAADHAPGKIFS  
963 LMTK FVANDAFNQALTNPLLSQNVWE  
964

965 **Skeletonema costatum MMETSP0013\_2-20120614\_556**

966 LLFPTFAQHLIDSFINTKLNTETGKFEWDQTESKHEISLGPLYGDDVGGQTNQLREKSE  
967 VTGRRGRLKTQILDGGEEWAHFLYDETGTCKKEEFNLIRDPDGMKHKALYSSDPAKSSI  
968 MQTIFAFGGRRVNLNPNMVA WNTLLLREHNRLAGEIERSEPSWDDERVFQTARNVLIVIYL  
969 KLVIQEYIGHISGVKFKLDPGEWMWNAPWYKTNWMSTEF SILYRWHALIPNQNGLGPSKD  
970 LGVLKSLFNPLLLDKEKGLGGNLRDVFVDICKARITSFQLFNTEKWMVGREAAATINQGR  
971 ANNVQPF AKYCEYLRIKPPKTFKDISLVPEVQQALEELYGTPDRVEFYVGLIAADHAPGKIF  
972 SLMTK FVANDAFNQALTNPLLSQNVWE  
973

974 **Detonula confervacea MMETSP1058-20130122\_27510**

975 LLFPTFAQHLIDSFINTKTKPLESGRLGFEWDQTF SKHEIGLAPLYGDYEEETLQLRE  
976 KSEASGRKGRLKTQVLDGGEEWAPFLYDSEGTKKPEFSLLPDGLQHILAMQPETMEKK  
977 KKSIFAFGGRRANLNPNIWA WNTLLLREHNRLASEIEKSEPSWDDERIFQTSRNVVIVMYCK  
978 IIIIEYIKHISGVNLRVEPGEWMWNASWYKPNWISTEFAILYRWHALIPNTSSWGASKNIEV  
979 VDALFNNTLLISKDTGMGGNLRDAFVEISKTRITSFELFNTEKAMVQRETA AIEQGRFNNV

980 ASYADYCEYLELKRPFEDISLKPEVQQALKELYGSPDRVEFYIGLIAADHPAGGKVFSAA  
981 MTKFVANDAFNQALTNPLLSQNAWN

982

983 **Skeletonema marinoi MMETSP1039-20121108\_4563**

984 LLFPTFAQHLIDSFINTKINVETGEFEWDRTDSKHEIGIGPLYGDEVEQTSQLREKSEK  
985 PGRRGRLKTQVLEGGEWAPFLYNEDGTTKKEFSAIHDPDGMKTILGLVYSSDPTTKSSIE  
986 QSIFAFGGRRANLNPNIWA WNTLLLREHNRLAGEIEKSEPGWDDERVFQTARNVLIVMYCK  
987 IVIEEYIKHISGVNFKVEPGPMMWNAPWYKTNWMSTEFAILYRWHALIPNEAGLGPSKDA  
988 GVMEALFNNPMLLDDETGLGGNLRDIFVDISQTRVTSLQLFNTEKWMVERESAAINQGRA  
989 NNVQSYAAAYCEYLDIEPPKTFEXISMVPERQQALKELYGTPDRVEFYVGLIAADHPAGGKI  
990 FSEMTKFVANDAFNQALTNPLLSQNVWE

991

992 **Skeletonema marinoi MMETSP0319-20121206\_26582**

993 LLFPTFAQHLIDSFINTKINVETGEFEWDRTDSKHEIGIGPLYGDEVEQTSQLREKSEK  
994 PGRRGRLKTQVLEGGEWAPFLYNEDGTTKKEFSAIEDGTTKKEFSAIHDPDGMKTILGLV  
995 YSSDPTTKSSIEQSIFAFGGRRANLNPNIWA WNTLLLREHNRLAGEIEKSEPGWDDERVFQT  
996 ARNVLIVMYCKIVIEEYIKHISGVNFKVEPGPMMWNAPWYKTNWMSTEFAILYRWHALIP  
997 NEAGLGPSKDAGVMEALFNNPMLLDDETGLGGNLRDIFVDISQTRVTSLQLFNTEKWMVE  
998 RESAAINQGRANNVQSYAAAYCEYLDIEPPKTFEDISMVPERQQALKELYGTPDRVEFYVGL  
999 IAADHPAGGKIFSEMTKFVANDAFNQALTNPLLSQNVWE

1000

1001 **Skeletonema marinoi MMETSP0562-20121206\_1237**

1002 LLFPTFAQHLIDSFINTKINAETGEFEWDRTDSKHEIGIGPLYGDEVEQTSQLREKSEK  
1003 PGRRGRLKTQVREGGEWAPFLYNKDGTTKKEFSAIHDPDGMKTILGLVYSSDPTTKSSIE  
1004 QSIFAFGGRRANLNPNIWA WNTLLLREHNRLAGEIEKSEPGWDDERVFQTARNVLIVMYCK  
1005 IVIEEYIKHISGVNFKVEPGPMMWNAPWYKTNWMSTEFAILYRWHALIPNEAGLGPSKDA  
1006 GVMEALFNNPMLLDDETGLGGNLRDIFVDISQTRVTSFQLFNTEKWMVYRESAAINQGRA  
1007 NNVQSYAAAYCEYLDIEPPKTFEDITMVPERQQALKELYGTPDRVEFYVGLIAADHPAGGKI  
1008 FSEAMTKFVANDAFNQALTNPLLSQNVWE

1009

1010 **Skeletonema marinoi MMETSP1428-20130617\_783**

1011 LLFPTFAQHLIDSFINTKINAETGEFEWDKNDKHEIGIGPLYGDEVEQTNQLREKSE  
1012 APGRRGRLKTQVLEGGEWAPFLYNEDGTTKKEFSAIHDPDGMKTILGLVYSSDPTTKSSI  
1013 EQSIFAFGGRRANLNPNIWA WNTLLLREHNRLAGEIEKSEPGWDDERVFQTARNVLIVMYC  
1014 KIVIEEYIKHISGVNFKVDPGPMMWNAPWYKTNWMSTEFAILYRWHALIPNEAGLGPSKD  
1015 AGVMEALFNNPMLLDDETGLGGNLRDIFVDISQTRVTSFQLFNTEKWMVYRESAAINQGR  
1016 ANNVQSYAAAYCEYLDIEPPKTFEDITMVPERQQALKELYGTPDRVEFYVGLIAADHPAGGK  
1017 IFSEAMTKFVANDAFNQALTNPLLSQNVWE

1018

1019 **Synedropsis recta MMETSP1176-20130426\_10672**

1020 PTKPWLQGQCRGMALRFPKRPLPDNLPAKTLVEDFCIRPDDASFTPCANGVNSL  
1021 TPYFALCVIHDFFRSDTGRSKVGLDRPWVNLHSSYLDLQTVYGYNKKSCASVRTQKHGK  
1022 LTEKKIVDHRLEMAVCHALILVMVKHHNFICDQLMERYPDKFKTDEMIFQTARLINC GV  
1023 YINLIIELYSCLFHVWNEDGSNPVELRGLDYPRDIQGYHLSYEFNIMYRFHAFIPKEWTPFY  
1024 GLKEAIAYLKKGDFTHSVPALSDDAIKTLVDAMSHRAGANHVPSNVPRVMGPAEVKGIE  
1025 DARLLGISTYNDKFKA VGEPKYDTFLDMSGNRPELAAKLEKHYPTVDDVEFAVGMRVETR  
1026 TPLRGAGFSTVGRAILADAFSSIRFDRFYQSSEYH



1027 **Nostoc WP015113127**  
1028 MLFPYWVQWFTDSFLRLDHTNKLKNTSNHEIDL CNVYGLTRKQTHLLRSFQGGKF  
1029 KTQKLKRQDGVVEEYPLFYADPAQGI VDPQFAGLYEPV NDEKRQPADKKQYLFAMGVE  
1030 RANVQIGYVMLNTLCLREHNRLCDV LASNYPDWDDERLFQTSRNILMAILKIIMEEYINHI  
1031 TPYHFKLFADPEAFTKESWYRTNHMAIEFDFVYR WHSAIPETFNCNGKPTHVADTLWNNK  
1032 ILIDQGLGALMEETCSQAGTRIGLFNTPNILVDLAELPSIKLGRQLQLASYNDYRELCGFPRV  
1033 TSFDQITGDEFTQQKLKEFYGHVDNIEFFVGLYSEDVRQNSTIPPVARLIGIDAFSQALTNP  
1034 LSPKIFN  
1035

1036 **Chaetoceros cf neogracile MMETSP1336-20130426\_1470**  
1037 LMLPIFAQWFTDSFLRTKFRVDGPQDFKENESNHEIDL CQIYGMTETQTAMLRSM  
1038 NGFLKSQIIDKEEFPAHLFEETASGLVQIKPEFAGLYTEANVQRVFRRASKEHKLNCFAVGI  
1039 EHGNTMGNTLMNIIWMREHNRIAREIAKAHPTWDDERLFQTARNVNIVLLLKVVVEDYI  
1040 FHISGFPFKMDNKIAEGERWYRSNWMAAEFALLYRWHDLIPDTVEFGGERKDSSALNKNN  
1041 RWLMKVGVDRACLDASQEPSGKIMLGNTPNFLVEVGKMSLKQGRVSGLASFN DYCEHYG  
1042 LKRKKNFMDLTGNNKEVSKKLEDVYGSIDNLEWVGLWAEAYDDKTKCMGPLYMVG  
1043 DAFTQALTNP LLAAEVFN  
1044

1045 **Grammatophora oceanica MMETSP0009\_2-20130614\_5553**  
1046 LLLPMFAQWFTDGLR TKWKPPTEQDYVENESTHQIDL NQIYGATEVQTNILRAKK  
1047 GGKLR SQMIKGEEYPEYLFDTETLQIKPEFEGLYSDVNFTRVFQNV SDEQKKVTFAVGLEH  
1048 GNSTVANTIMNTLFLREHNRLAGIIEAAHKDWDDERIFQTRNCLIVILMKIVINDYVAHIA  
1049 DAPVFLDAGGFAEDQPWYRENWMSVEFNLLYRWHDMIPDQVSFTSADQVSFSSEDEYWD  
1050 MESSKTLVNNNTLMLELGVEQILLDASKQRAGQLGLFNTPDFLLHVHKETMKQCRMINLA  
1051 PYVDYCKEYGLTVPKTFRELTGGNLEYAKALESVYDSVEHVEWVFWGLWAGGKALGQFSS  
1052 DLLILMVGHDAVTQLFTNPLLSRRVYN  
1053

1054 **Gersemia fruticosa AAF93168**  
1055 WLFMFFAQHF THEFFKTIYHSPAFTWGNHGV DVSHIYGQDMERQNKLR SFEDGKL  
1056 KSQTINGEEWPPY LKDV DNVTM QYPPNTPEDQKFALGH PFYSMLPGLFMYASIWLREHNR  
1057 VCTILRKEHPHWDERLYQTGKLIITGELIKIVIEDYVNHLANYNLKLTYNPELVFDHGYDY  
1058 DNRIHVEFNHMYHWHPFSPDEYNISGSTYSIQDFMYHPEIVVKHGMSSFVDSMSKGLCGQ  
1059 MSHHNHGAYTLDVAVEVIKHQRELRMQSFNNYRKHFAL EPYKSFEELTGDPKMSAELQE  
1060 VYGDVNAV DLYVGGFFLEKGLTTS PFGITMIAFGAPYSLRGLLSNPVSSPTYWK  
1061

1062 **Gersemia fruticosa AAS48061**  
1063 WLFMFFAQHF THEFFKTIYHSPAFTWGNHGV DVSHIYGQDI ERQNKLR SFQD GKLK  
1064 SQMINGEEWPPY LKDV DNVTM QYPPNTPEDQKFALGH PFYGMPLPGLFMYASIWLREHNR  
1065 VCTILRKEHPHWEDERLYHTGKLIITGELIKIVIEDYVNHLANYNLKITYDPELVFDHGYDY  
1066 DNRIHVEFNHMYHWHPFSPDEYNISGSTYSIHEFMYHPEIVVKHGMSSFVDSMSKGLCGQ  
1067 MSHHNHGAYTLDVAVEVIKHQRELRMQSFNNYREHFALEPYKSFEEMTGDPKMAAELQE  
1068 TYGDVNAV DLYVGGFFLEKGLTTS PFGITMIAFGAPYSLRGLLSNPVSSPTYWK  
1069

1070 **Plexaura homomalla AAU87497**  
1071 WLFMFFAQHF THQFFKTVHHS PAFSWG N HGV DVSHIYGQGV ERENKLRAF KD GKL  
1072 KSQMINGEEYPPY LKDVDDLKM QYLENTAE EQKFALGH PFFSMLPGLFMYATIWLREHNR  
1073 VCMILRKEHPHWEDERLYQTGKLIITGELIKIVIEDYVNHLANYNMKLR YDPQLVFSRNYD  
1074 YDNRIHLEFNHLYHWHPFSPDQFNISGTTYAIKDFMYHPEIVVKHGMSSFVNAMSSGLCGK

1075 MSHHNHGQYTLDVAVEVIKYQRELRMQSFNXYRRHFGLHAYKSFEEMTGNPKMAAELK  
1076 EVYGDVNAVDFYVGGFFLEKSLTTSFPGITMIASGAPYSLRGLLSNPVSSPTYWK

1077

1078 **Plexaura homomalla AAF93169**

1079 WLFMFFAQHFTHQFFKTVHHSWPAFSWGNHGVDVSHIYGQGVERENKLRAFKDGKL  
1080 KSQMINGEEYPPYLKDVDGLKMQYLENTAEEQKFALGHPPFSMLPGLFMFATLWLRHNR  
1081 VCMILRKEHPHWEDERIYQTAKLITGETIKIVIEDYINHLANYNMKLRYDPQLVFSRNYDY  
1082 DNRIHLEFNHL YHWHPFSPDQFNISGTTYTINDFMYPHPEIVVKHGMSSFVNAMSSGLCGKM  
1083 SHHNHGQYTLDVAVEVIKYQRKLRMQSFNNYRRHFGLPAYKSFEEMTGDPKLAAELKEV  
1084 YGDVNAVDFYVGGFFLEKSLTTSFPGITMIASGAPYSLRGLLSNPVSSPTYWK

1085

1086 **Gammarus sp ADB65786**

1087 LLFQYYAQHFTHQFFRTNYTKGPQFTKGNNGVDVSNIYGLTERQRRALRSNVDGK  
1088 LKFQIINGEHFPPYLKDVPGISMEYPPHLPITEDNKFALGHPPFALLPGLFVYSTIWMREHNR  
1089 VCEVLKEQHPHWDDERLYHTAKLITGEVIKITYEDYVQHLSQYKVDLKFQVVGTRFQ  
1090 FHNRIINVEFDHLYHWHPLIPEGIKVEDSYSLMDMAFSTKSVFTHGLDAFVKALVTNRAG  
1091 KLTSRNHSPVTVPVLLKMLENSRILRFQGVNQRKKNMRPFRDFDLTGDEELARDMEE  
1092 MYGDINAVEYYVGLIAEKDPSLTPMTMVNNGPWSVKGLIANPICSPHWWK

1093

1094 **Caprella sp. ADB65785**

1095 LLFQYYAQHFTHQFFRTNYTMCPQFTKGNNGVDVSNIYGLTEQHRRAIRMNSDGK  
1096 LKYQVINDEHYPPYLKDVQGIEMDYPPHIPITEDNKFALGHPPFALLPGLFVSTIWMREHN  
1097 RVCDVLKNQHPDWDDERLYHTAKLITGEVIKITYEDYVQHLSQYKVDLKFQVVGTRFQ  
1098 QFDNRINAEFNHL YHWHPLIPDGIQVEDKYSLMDMAFSTKSVFTHGLDKFIESMATSRAG  
1099 KLSHSNHPLVTLPLVLLKMMENGRKLR YQGINEYRKRFAKPFKDFMDLTGDEALAKDLQ  
1100 ELYGHVDAVEFYVGLLTKDPSLTPMTMVNNGPWSVKGLIANPICSPHWWK

1101

1102 **Nitzschia sp. MMETSP0014\_2-20120614\_6887**

1103 PQLNFWMLSFVNWFHDDNFRTLPD TDGAF TWSDRGLHMT HLYGHTEYRQAALR  
1104 TMAGDGKMKTSRSLGWDYYP LLM DVQADFPDFDMWTSQRGSKHKSTSAGQTSEQADE  
1105 NMPYYFAIGDPRFNLHLGHILWTSVGLYLHNTACVILQREDPGLTDEDIFQRARVIVFHIIQ  
1106 KIRLQDFVMSISSTRDHIRIPYDPKLLREEFAHHFAYS GGNQPNFLEFNHLYQAWHALIPN  
1107 GLVLNEDVDDGEKDILPIRKT LWAPKLMTTNTFTIGEMATSFAS TPLTLYSPHNFPVFLRGVT  
1108 EAALKDERAQRMAPYNSYRELIGLDPITSFEQFAVDDPQKMAELYNNDVDSVDFIAGILAD  
1109 SNPHLPGNFFGVQLVLVALFALQDLANNPLILD PVMS

1110

1111 **Skeletonema marinoi MMETSP0319-20121206\_1511**

1112 EADVALVANIMKRDTNSFAPFNQLASAWIQFMTHDWFQHDASSSQGLKMKNVVT  
1113 HWWDASQMYGSSQEEVDAVRAEGGKLHLDVND EIDYNASLPITGFRENWWAGLHILHTI  
1114 FAREHNHIVDILAQSYPSMTEDELFGTARNIIAVLLAKIHTVEWTP TLLDNAVSDMALNIN  
1115 WHGLQTVTSMYFKGKNIPDEVKDIIDEMKVPSVFGSNYTT EQTLFNTPFYMTEEFVSVYR  
1116 MHTLLPDAMILEGGKTVSLQELAF TDARNLVSDPSKTTATLLQAF AHTPAQALSLKNYPKS  
1117 LFNLQIGNGK SINLAEIDISRDRARGIPRYNDARRQLL LTPYKSMDDLTS DKEELKLLKSVY  
1118 TDIEQVDFLVGCLVDKDRPDGFAFGIVPYYIFVVMASRRLLSDRFFQEGLTEENYS

1119

1120 **Pseudo-nitzschia pungens MMETSP1061-20121228\_74475**

1121 DNVQVIAQRLAREGFKPAGNQLNIIAAAWIQAQVHSWIQHLDGAPTSIEATAEAV  
1122 GPVCPVKKMNFFETEERPDGEYNSFRTQWWDAS FVYGQNREQVHLGR LYKDGKLVNES

1123 NPDTLFVVEEGKSKIDVVGDQSNWSVGVTVLQVLFKEHNYCAEMIKKENPQLTDEEIYGH  
1124 CRNIISALVAKIHTIDWTVELLKTEQLRVAMEINWKGATKAVFGDKAPFHPLRLINKPKAD  
1125 NKGVPFCLTEEFAAVYRLHPLLPPGLVVEHGEKKEEFIEKLLTTKGRDKMREPGMAKKI  
1126 MFSAFHYSCGHLKSSNYPFIMRKFTPTDHKGVDLQPPEDRVVDMAAIDLHRDRERGIQKY  
1127 NEFRRQLKLRPFKTWEALTGEENKSDNELTDAKKLELIYGPAPEGIEKIDLLVGDLYERKIA  
1128 DGFALSETSFMIPLLMASTRIDSDPYLNEYNEEYYT

1129

1130 **Thalassiosira rotula TR754|c0\_g1\_i1|m.3431**

1131 MLFPTFAQHLIDSFIVTAIKENTSEGVEFDWRKTGSPHDIGLLPLYGKTIEQTTQLRL  
1132 KSELKGSKGLKTQIIKGGWSPYLFDAKGNKKPEFSSLPDPEGLEFALGMAKQHGVDVK  
1133 KNKATVFALGGSANLTPNIVAWNTLLLREHNRIASKIEEENPKWDDERVFQTARNVNLA  
1134 VYLRVIEEYINHITGFGVDFTVEPGKWMWDAPWYKRNWISAEFAVLRYRHAVIPNCMK  
1135 WGEKTLPTASYLYSNHLLDDEDGMKGDLEAFINISDHRATSMQIHNTESWMKGRDARAL  
1136 QMSRACELRSFTEYCAYLGAKEVPKTFADITSDVEVQNELKALYKVENIEFWVGLIAKDH  
1137 PTESIMSAELTSFVANDAFNQALTHPLLSEHVWAAGPE

1138

1139 **Skeletonema marinoi MMETSP0920-20130426\_33289**

1140 LLFPTFAQHLIDSFINTKINVETGEFEWDRDTSKHEIGIGPLYGDEVEQTSQLREKSEK  
1141 PGRRGRLKTQVLEGDEEWAPFLYNEDGTKKEEFSAIHDPDGMKTILGLVYSSDPTTKSSIEQ  
1142 SIFAFGGRRANLNPNIWA WNTLLLREHNRLAGEIEKSEPGWDDERVFQTARNVLIVMYCKI  
1143 VIEEYIKHISGVNFKVDPGPWMWNAPWYKTNWMSTEFAILYRWHALIPNEAGLGPSKDAG  
1144 VMESLFNPNVLLDDETGLGGNLRDIFVDISQTRITSFQLFNTEKWMVERESAAINQGRANN  
1145 VQSYAAAYCEYLDIEPPKTFEDISMVPERQQALKELYGTPDRVEFYVGLIAADHPAGGKIFSE  
1146 AMTKFVANDAFNQALTNPLLSQNVWE

1147

1148 **Fragilariopsis kerguelensis MMETSP0907-20130614\_13332**

1149 PNVQVVAQRLLARESFTPAGDQLNIVAAGWIQAMVHDWMKHEDGKKTSMEVTPA  
1150 VVGSQCPLHRFNLFETKERPDGHYNSERTNWWDASFVYQGNAEQVQNSRAFVGGKLVN  
1151 EKNPDTLPSRDDGTDLTGDQSNWSVGVSVLQTLFLYEHNYCAEQIAKENPNLTDHQIYGH  
1152 CRNIIAALVAKIHTIDWTVELLKTPQLKIGMRTNWMGIIQAITGLKIPFLDRLLRLIKKKENN  
1153 NEGVPFCLTEEFAAVYRLHPLLPPGLIIEGEGAGDKDEDEDTFIDLRDTLTTKGRDLMRKSG  
1154 MAKKVMKAVFTYPCGNMAPSNYPDVMRDFHPTDLLGNNLDDRIDLAAIDLFRDRERGIQ  
1155 YFNNFRRKLSMKPFQTWEELTGDDKMTEEALAAFVAGTGNLNNAKKLELVYGAAPKGIE  
1156 HCDLLVGDLYEKKIPGFAISETSFMIPLLMASTRILDADPYLNEYFDEEHYT

1157

1158 **Skeletonema grethea MMETSP0578-20130828\_1168**

1159 ILVAYSIXSFQYVLDKPAASQLNVLAASWIQAMVHDWIGHFDGDETETLDRGGES  
1160 LCPFAKSPFSFKNTKTEKIDGVFPSPERTNWWDASFVYGNNSAQIDRARTMQGGKMVTS  
1161 DIPHALAEDKDG VYFAGDNKNSWVGVALQLDFIREHNYICDQIAAEAKEEGKEMTDEEL  
1162 FGKARVVVAALVAKIHTVDWTVELLKTKLLAIGMKTNDWGLLKA VGIPIPGILSQMGEKK  
1163 GRVSDNEGTPFCLTEEFAAVYRLHLSLPPGLILGDGDAKDKFIGLEDLLGDEGRKQMRETK  
1164 TRPKEMMKSCLHWPCGALMSSNYPNAFRDVAPTDDYGKDLKSQNIDLAALDLFRDRERGI  
1165 LKFNEFRRQLNLKPYRTWLELTENEEDARKLELIYGPQEGIERCDLLVGDMYERKVQPSF  
1166 ALSETSFIIPLLMASTRILSADPFLNELYNEETYS

1167

1168 **Staurosira sp MMETSP1361-20130828\_23824**

1169 LLFPFFAQWFVDSFLRTKWKPLAEQDFKENESNHIDIDLNQIYGTSEIQTDMRLSMK  
1170 GGRLKSQIIDGEEYPVFLFDQKTATLKPEFRGLYTEENFKRVFGNASKEHKLHSFAVGLEH

1171 GNSTIGNTVMNTLFLREHNRVAGVISAAHPEWDDERVFQTTTRNVMIVLLIKIVLADYIYHIS  
1172 GAAVFADPGGFAEDELWYRENWMSVEFSLLYRWHDLIPSSVTFDGETRDAVDLQNNNRW  
1173 LLKAGMDSVIQDASNQKAGVMGLGNTPDFLLSVTKMSLHMARTCKLSSYVEYCKEYGGQD  
1174 PPEDFMDLTGDQDSASKLERVYGSIDKVEWVGLFAQKRDFVSGLLMTLMVGNDAVTQA  
1175 FTNPLLAKRVYN

1176

1177 **Skeletonema marinoi MMETSP1428-20130617\_31509**

1178 EADVALVANMMKRDTNSFAPFNQLASAWIQFMTHDWFQHDASSSQGLKMQNVV  
1179 THWWDASQMYGSSQEEVDAVRAEGGKLHLVDNDEIDYNASLPITGFRENWWAGLHILHT  
1180 VFAREHNHIVDILAQSYPSMTEDELFGTARNIIAALLAKIHTVEWTPKNIPDEVKDIIDEMKV  
1181 PSVFGSNYTTEQTLFNTPFYMTEEFVSVYRMHLLPDEMILEGGKLQELAFDARNLVSDP  
1182 SKTTATLLQAFAPHTPAQALSLKNYPKSLFNLQIGNGKLNLAEIDISRDRARGIPRYNDARR  
1183 QLLLTPYKSMDDLTSKKEELKLLKSVYADIEQVDFLVGCLVDKDRPDGFAFGIYYIFVMA  
1184 SRRLLSDRFFQ

1185

1186 **Homo sapiens NP000953**

1187 LMFAFFAQHFTHQFFKTSKGKMGPGFTKALGHGVLDLGHYGDNLERQYQLRFLKDG  
1188 KLKYQVLDGEMYPPSVVEEAPVLMHYPRGIPPQSQMAVGQEVFGLLPGLMLYATLWLREH  
1189 NRVCDLLKAEHPTWGDEQLFQTTRLILIGETIKIVIEEYVQQLSGYFLQLKFDPELLFGVQFQ  
1190 YRNRIAMEFNHLYHWHPLMPDSFKVGSQEYSYEQFLFNTSMLVDYGVVEALVDAFSRQIAG  
1191 RIGGGRNMDHHILHVAVDVIRESRMRLQPFNEYRKRFGMKPYTSFQELVGEKEMAAELE  
1192 ELYGDIDALEFYPLGALLEKCHPNSIFGESMIEIGAPFSLKGLLGNPICSPEYWK

1193

1194 **Ovis aries NP001009476**

1195 LMFAFFAQHFTHQFFKTSKGKMGPGFTKALGHGVLDLGHYGDNLERQYQLRFLKDG  
1196 KLKYQMLNGEVYPPSVVEEAPVLMHYPRGIPPQSQMAVGQEVFGLLPGLMLYATIWLREHN  
1197 RVCDLLKAEHPTWGDEQLFQTARLILIGETIKIVIEEYVQQLSGYFLQLKFDPELLFGAQQFQ  
1198 YRNRIAMEFNQLYHWHPLMPDSFRVGPQDYSYEQFLFNTSMLVDYGVVEALVDAFSRQPA  
1199 GRIGGGRNIDHHILHVAVDVIKESRVLRLQPFNEYRKRFGMKPYTSFQELTGEKEMAAELE  
1200 ELYGDIDALEFYPLGALLEKCHPNSIFGESMIEMGAPFSLKGLLGNPICSPEYWK

1201

1202 **Homo sapiens NP000954**

1203 MMFAFFAQHFTHQFFKTDHKGPAFTNGLGHGVLDLNHIYGETLARQRKLRLFLKDG  
1204 KMKYQIIDGEMYPPPTVKDTQAEMIPPQVPEHLRFAVGQEVFGLVPGLMMYATIWLREHN  
1205 RVCDVLKQEHPEWGDEQLFQTSRLILIGETIKIVIEDYVQHLSGYHFKLKFDPELLFNKQFQ  
1206 YQNRIAAEFNTLYHWHPLLPDTFQIHDQKYNYYQFIYNNSSILLEHGITQFVESFTRQIAGRV  
1207 AGGRNVPPAVQKVSQASIDQSRQMKYQSFNEYRKRFMLKPYESFEELTGEKEMSAELEAL  
1208 YGDIDAVELYPALLVEKPRPDAIFGETMVEVGAPFSLKGLMGNVICSPAYWK

1209

1210 **Coccotylus truncatus AFN20596**

1211 VLIAYYAQWVTHQFFNTDESPTGHSVKQPVGVNMSMLYGSKQEVVEKSVRAYKG  
1212 GLLKSTIKNGQEFPEIMPCQEGSRIPGKEMFNMPILIANMIPGFAAIHVLFFRRHQYICRELA  
1213 KWAEAQGNIDDEELFQAKLIVTVNMLRITMHDYVSRALQSSHAKMRFDQKVKQSRIW  
1214 KMFGPDYFPPSNAIQFEFNIFYRWHQFYPTTKIMKRIDDLKFPKSKQQLDEKWNVAVRWIA  
1215 DEPDGMRVLFSASSQRAGKLSLLNTNQWIVEHVVKPGLARCREHQLASYNDYREKVGFP  
1216 RLTTFEQVTSNPALLEKLRVYRNVDQIEYYPGVFAEDKHFGNVHGPLTFGSSMTFTGIFSS  
1217 RLFETALDE

1218 **Ciona intestinalis XP002127674**  
1219 VLFPFFAQHFTHMFFKTDPMKGMPIYQWGDQLVDLSQIYGHGKQRQHELRSVNG  
1220 KLKVSLLVDGHEFPPLSNQTTANMSNINLLPQEYQFVFGHQGFSLMPTFLIWSTIWLREHNRI  
1221 CDLIKEENPAWDDERIFQTARLVLTGETIKVVIEDYVQHLSGFHYKLLYDPELVQGGSHSF  
1222 HNQHVEFQLLYHWHALMPDQIEFNGKSYTMKRLLFNPEPVVKGGGLKRTIEDLSNQWAGQ  
1223 VAGGKTQGAATLHVAGLAIKNGRDLRMQSFNAYKEKFEMKKYTTFQELTGEEEMAELQ  
1224 KLYGDIDAVEYYIGIMLEKRRSPQLFGETLTEMGSPYSLKGLYSNPINHKDWWK  
1225

1226 **Ciona intestinalis XP002123273**  
1227 VFFAFFAQHFTHQFFKTNITIKGMPFQWGEHSVDLSHVYGHITQRQHELRSIDGKL  
1228 KVFETNGEVFPPLTESANVTMSGEKLMRGRKFAIGHPGFGAFPSFFVIATLWLREHNRVCDI  
1229 LKDLHPDWDDERLFQTARLILTGETLKIIVEDYVQHVS GFHFQLSYDPEILHKSTFSYNNQI  
1230 HAEFHILYHWHMLMPDFIELGEHVYPLKELLFNVDPVVEIGMETVLKQLSNQFAGKVVG  
1231 RNQGPPELVAVVELALKQTRQMRMCSFNKYRERFRGMKPYTSFEELTGETEVAALLRNLYY  
1232 DIDALELFGYFVEHRRNRQVLGATMLEMGAPYSLKGVFGNPIGSPAWWK  
1233

1234 **Oncorhynchus mykiss CAC10360.1**  
1235 LMFAFFAQHFTHQFFKTRNSMGLGFTRALGHGVDAGNVYGDNLVRQLNLRLLKD  
1236 GKMKYQVVKGEVYPPTVAEAAVNMRYPQETPVGQRMAIGQEVFGLLPGLTMYATLWLR  
1237 EHNRVCDILKAEHPTWGDEQLFQTARLIVIGETIRIVIEEYVQHLSGYLLDLKFDPVLLFKST  
1238 FQYRNRIAVEFKQLYHWHPLMPDSFHIDGDEVPYSQFIFNTSIVTHYGVEKLVDAFSRQCA  
1239 GQIGGGRNIHPVVTNVAEGVIEESRTLRLQPFNEYRKRFLNPKPYTSFSDFTGEEEMARELEE  
1240 LYGDIDALEFYPAIMLEKTRPNAIFGESMVEMGAPFSLKGLLGNPICSPEYWK  
1241

1242 **Fistulifera solaris GAX23950.1**  
1243 LPPVKDVAAILRRPMNPTSVAPFNQIAVAWIQMMTHDWFQHDPAHPDQKMNRVT  
1244 HWWDASQLYGSTLAQQTAVRVPNTGKVRDLQHQELNYTTTGIPITGFADNWWAGLHMM  
1245 HTLFRVREHNWLVDQFERQYPGVYTANDKFQLARLCLSALLAKIHTVEWTPTLNDNPVAAL  
1246 GLHTNWRGVDAILEYGTREFELQAYRIVGGDQSVPHAGNGTTRETLYNTTFAMTEEFVAV  
1247 YRMHPLLPDEMEIEGKTFSLNDLSFVDARTLTKSVKTTQTLLQAFGMTANTLSLQNYPRQ  
1248 LYGLEKPGMSQPVNLAEIDLQRDRERNLPRYNDMMRQQLLKPYPKRELDLTDDETELNLLK  
1249 SVYQDMDQVDLMVGCLVDKDRPYGFAFGIVPFHVFLVMASRRILNDRFFMEDFNAKVYT  
1250

1251 **Cyanothece sp Heam peroxidase ACB53655.1**  
1252 PNPRVVSRTLMTREDFKPATILNLLAAAWIQFENHDWFSHGDNKPEDKLEIPLEAN  
1253 DPWPPEEYRPLEVGKTLPTDTSRPEGAKPPTFINTVTHWWDGSGIYGSNPETVDQLRSHEDGK  
1254 LIIGENGLLPVDPETGVDITGFNDNWWIGLGMHLTLFTREHNLICDHLKQEYSQWSDDDL  
1255 DHARLINAALMAKIHTVDWTPAILPLPATDIALNVNWNGLGEDIKQVLGTVGEGEADLL  
1256 TGIIGSDKNHHTAPYYLTFEFSVYRMHPLIPDELEFRSLEGDKFLQEVNFFEMSGKRTRAL  
1257 LESISLPDLFYSGITHPGAITLHNYPRFLQQLVRDNGEVFDLAAVDILRDRERGVPRYNRFR  
1258 EIMGRGRVKCFEEISSNKQWVEEMRRVYNDNIDQVDLMVGLFAEDTPEGFGFSDTAFRVFI  
1259 LMASRRLKSDRFFTTDYRAEIYT  
1260

1261 **Fistulifera solaris GAX18717.1**  
1262 LPPVKDVAAILRRPENPSTVAPFNQIAVAWIQMMTHDWFQHDPTNPDSKMNRVTH  
1263 WWDASQLYGSTLTQQRVAVRVPNTGKLRDLKHQELNYTSTGIPITGFADNWWAGLHMMH  
1264 TLFVREHNWLADQFELQYPGVYTANDKFQLTRLCLSALLAKIHTIEWTPTLNDNPVAALGL  
1265 HTNWRGVDAILEYGTQFELQAYRIVGGDQSVPHAGNGTTRETMYNTTFAMTEEFVAVY

1266 RMHPLLDDMEIEGITLTLNDLSFVDARKLTKSVKTTQTLLQAFGTTTPANTLSLQNYPRQL  
1267 YGLEKPGMSQPINLAEIDLQRDRERNLPRYNMRRQLLLKPYKRLEDLTDDTELNLLKSV  
1268 YQDIDQVDLMVGCLVDKDRPYGFAFGIVPFHVFLVMASRRILNDRFFMEDFNAKVYT  
1269

1270 **Alcanivorax nanhaiticus WP\_035233415.1**

1271 PNPREVSNLIMSRGGDFKPATTLNFIATSWIQFMVHDWFDHGPRTDANPIEFPLPAG  
1272 DVLGGGTMSVQRTRPDPDVSDEGHIYENINTHWWDGSQLYGSSKEKNDEVRSFVDGKL  
1273 KVDGDGRLPTEFFSGKPVTGFNENWWVGLSMLHHIFTQEHNADMLVANYPGQSDQWY  
1274 FDKARLINSALMAKIHTVEWTPAILANPVLERAMYANWWGLGGDRDKRDKYQDDLDNL  
1275 NNNLGQIGLLDLVGIDNGLGDSPTGSLEHALAGLVGSRTPNNNYNVPYTLTEEFVSVYRM  
1276 HPLLREDEIKVYDIGSNVDEEIALEDTRNGDAEDLLGDIGQDRLWYSFGITHPGALTLNNYP  
1277 DFLRNLSMPLIGDIDMAAIDILRDRERGVPYRNEFRRQIGLKPLTSFEQLTSDPQLLADLKAL  
1278 YNNDIELVDTLVGQLGEETRPEGFVGFGETSFQIFILNASRRLMTDRFFTTDYTDEVYT  
1279

1280 **Hordeum vulgare subsp. vulgare BAJ90503.1**

1281 PDPFVVATKLLARREYKDTGKQFNILAAAWIQFMVHDWMDHMEDTKQIEITAPKE  
1282 VANECPLKSFKFYATKEQPTNSDGIKTGYHNIRTAWWDGSAVYGNNEKQEKKIRTYADG  
1283 KLVIGDDGLLLHEENGVPVLSGDVRNGWVGISILQALFVKEHNAVCDAIKEEHPNLSDEELY  
1284 RYAKLVTSAVIAKIHTIDWTVELLKTKTLRAGMRANWYGLLGKKIKDTFGHIGGTALGGL  
1285 VGLKKPINHGVPYSLTEEFTSVYRMHPLIPSTLKLDPDTPGQPAADNSPPYLEIDIDIGELVGLK  
1286 GEDQLSKIGFEKQTLSMGYQACGALELWNYPSSFRDLIPQNLDTNRSDRIDLAALEVYRD  
1287 RERSVPRYNEFRRLFLIPIKCWEDLTSNDIAIEAIRAIYGDDVEKLDLLVGLLAEKKIKGFA  
1288 ISETAFNIFILMASRRLEADRFLTSNFNEKTYT  
1289

1290 **Triticum aestivum CDM84254.1**

1291 PDPFVVATKLLARREYKDTGKQFNILAAAWIQFMVHDWMDHMEDTKQIEITAPKE  
1292 VANECPLKSFKFYATKEQPTNSDGIKTGYNNVRTAWWDGSAVYGNNEKQAEKTRTYVDG  
1293 KLVIGDDGLLLHEENGVPVLSGDVRNGWVGVSILQALFVKEHNAVCDAIKEDHPNLSDEEL  
1294 YRYAKLVTSAVIAKIHTIDWTVELLKTKTMRAAMRANWYGLLGKKFKDTFGHIGGTALG  
1295 GLVGLKKPINHGVPYSLTEEFTSVYRMHSLIPTTLKLDPDTPGQPAANNSPPYLEIDIDIGELV  
1296 LKGEDQLSKIGFEKQTLSMGYQACGALELWNYPSSFRDLIPQNLDTNRSDRIDLAALEVY  
1297 RDRERSVPRYNEFRRLFLIPIKSWEDLTSKDAIESIRAIYGDDVEKLDLLVGLMAEKKIK  
1298 GFAISETAFNIFILMASRRLEADRFLTSNFNEKTYT  
1299

1300 **Rhizophagus clarus GBC07128.1**

1301 LELEHYITALTQLPLNTPEEKLLSILERLLVTQLWSDISKPPAMIAGDIYRSSDGSY  
1302 NRLIQSLGKANSRYSLSRIQYPIKLSVLPKSEDIFDKIMVQGGDFVEHPSGISSMLFYLAIIIT  
1303 HDLFHTSFADPNINLTSSYLDLTPLYGSNDQEQKSIRTLKGGLLKPDTFADSRILLQPPGVSA  
1304 LVILFSRNHNFAIQTLLKKNELGRFSVTNPNDPEQLKKQDEDLFQTARLINCIFYINVILHNY  
1305 LRTILGLDRNSKWFVDPTVPYNKRGQLEPLPSGIGNIVSLEFNYYRWAATSKDDSKFVE  
1306 DEFKTIFGDDWENITIDEFKEKMGVWGRSIPKDPSKWKFNHIERGSDNRFKDTDIAKEIING  
1307 TKKVSGAFGANRIPKVFRPIELLGIESARVLGLSSLNDFRRSLNLKPYESFMEMNPDPLIAKK  
1308 LEELYGSIENVELYPGLMTEKTKPDMLGSAIALPFTISRILSDAVNLVRNDRYYTNDFSR  
1309 NLT  
1310

1311 **Emiliana huxleyi XP\_005780718.1**

1312 PFQALHNLPSADEVVRLLYKRDAFKKAPYGVNSLATWFANVAIHDFFRATATGTDG  
1313 GTHPERGSDKEWVNLHSSYLDLQPLYGYSKTTADATREWSGGKLLKAFEDRMRRIPESRV

1314 IVELLRREHNYVAEQLAQRYPAQFATDEELYQQARLIMGGVYINILRAYGCQMFGEIAPD  
1315 GSGFCELRRQGYGGAGVGNMCTFNFNLIYRFHTSIPVEWSATDPPPIDTDEQMRTLNGILN  
1316 WESGGFGPNNVPDSILGERARVSQRAIEAARLMGAPTLNTRRRFTSGYSSFEDMTGGDQA  
1317 TADTLRQLYPPGGIEDVELVVGVCQVEKCMSGGWALPSTIGQAIVADAFASIRQDRFYTQDW  
1318 GASSYT

1319

1320 **Rhodococcus gordoniae WP\_064063209.1**

1321 VWFAFFAQWFTDSFLRTNSKDPKNDNSNHEIDLCQIYGVNQAKTMLRAGYGGRL  
1322 DSQVIDKKEYPPFLFAARTPGEELRFVPKFEGLHDREYLLDTVLRLCPDERKKS VFAVGLE  
1323 HGNSTIGNTVLNVFLREHNRIAGILEGAYPEWDDDRLFETTRNIMIVILLKIVIEEYIKHIGP  
1324 FDFPIEFVPMADNAPWNRTNWCAIEFNLLYRWHSLIPDTVVFDSQRVSTRILVDNNPLVL  
1325 DRGIESIIDQCSRQKASRIGLGNTPAFLIDRHPMCPDRESVEERTVGLMRQARLRSFNDYRE  
1326 AFGLGRLTSFTELTGDVEVQQKLARLYGDVDAVEWYVGIFAEDYPRHRMMGELLTTMVA  
1327 HDAFTQAFTNPLLARHVYHEDTF

1328

1329 **Herbidospora mongoliensis WP\_066371138.1**

1330 VMFMFFAQWFTDSFLRTSRDDFRNTSTQEIDLCQIYGLTEEKTHLLRAHRDGRK  
1331 SQLIDGEEYPEFLFRPRSSGEPVFKPEFEGLHDSEFIVSRILLEDAPKQKDTFFAVGLEHGN  
1332 STIGNTIMNVVFLREHNRIAGLLKQAHPEWAERPEGADARLFETTRNIMIVLLLKLVVEEYI  
1333 RHISPYDFPLETVPFIADGKRWNRSNWISIEFNLLYRWHSLVPSTIGSGPDRLDSTDFRNNNP  
1334 LVLARGIESLVSQCSGERAGRIGLMNTPGFLVDRDPAHPERPSVQERTIALSRKARLASYN  
1335 YRENFGLGRLKDFGRLTQDAELRERLEKLYDDIDKLEWYVGIFAEDYSRDEMMGRLMTT  
1336 MVAYDAFTQALTNPLLARDVYNEATF

1337

1338 **Eutrema halophilum BAJ34623.1**

1339 MVVATKLLTRRKMIDTGKQFNMAASWIQFMIHDWVDHLEDTDQIELSAPKEAAK  
1340 GCPLSSFRFFKTKEVPTGFFEIKTGSLNTRTPWWDSSVIYGSNSKTLERVRTYKDGKLIKISEE  
1341 TGLLLHDDDDGLAISGDIRNSWVGVSALQALFIKEHNAVCDLLKKEYEDEDLRYRHARL  
1342 VTSAVIAKIHTIDWTVELLKTDTLLAGMRANWYGLLGKFKDFTFGHVGSSIFGGVGMKK  
1343 PQNHGVPYSLTEEFTSVYRMHSLLPDQLHMRDIDVTPGPNKSLPLTQEVSMKLGREGEE  
1344 TMSQIGFTKLMVSMGHQACGALELMNYPAWFRDLVPQDPNGHDRPDHIDLAALEIYRDR  
1345 ERNVARYNDFRRAMFMIPIKTWEDLTDDKEAIELDDVYGGDVDELDDLVLGLMAEKKIKG  
1346 FAISETAFNIFLLMATRRLEADRFFTSDFNEMTYT

1347

1348 **Pisum sativum CAH05011.1**

1349 PDPMVVVTKLLERKTYKDTGTQFNVAASWIQFMIHDWIDHMEDTKQVELSAPSEV  
1350 ASQCPLKSFKFFKTKEIPTGFYDIKTGHANVRTPWWDGSSVYGSNEQVLNKVVRTFKDGKL  
1351 KISKEGHLLHNEDGTAISGDIRNSWAGVTTLQTLFVQEHNAVCDALKKENS DLEDEDLYR  
1352 HARLVTSAVIAKIHTIDWTVELLKTDTLLAGMRANWYGLLGKQFKDRFGHVGNSILSGFV  
1353 GMKRSENHGVPYSLTEEFATVYRMHPLLPDSLHLRDISASPGPNKSPPLIKEIPMNDLIGLQ  
1354 GEKTLLEIGNAKKLVS MGHQACGALELWNYPSWLRNLVPHNIDGTERS DHVDLALEVY  
1355 RDRERNVARYNQFRRGLLLIPISKWEDLTDDEEAIK VLEEVYGGDDVEELDVLVGLMAEKKI  
1356 KGFAISETAFVIFLLMASRRLEADRFFTSNFNEETYT

1357

1358

1359

1360

1361

1362 References

1363 1. Kelley, L. A., Mezulis, S., Yates, C. M., Wass, M. N. & Sternberg, M. J. E. The Phyre2 web portal  
1364 for protein modeling, prediction and analysis. *Nature Protocols* **10**, 845–858 (2015).

1365

1366
